1 Comprehensive taxon sampling and vetted fossils help  
2 clarify the time tree of shorebirds (Aves,  
3 Charadriiformes)

4 David Černý<sup>a,\*</sup>      Rossy Natale<sup>b</sup>

5 <sup>a</sup>Department of the Geophysical Sciences, University of Chicago, Chicago 60637, USA

6 <sup>b</sup>Department of Organismal Biology & Anatomy, University of Chicago, Chicago 60637,  
7 USA

8 \*Corresponding author. Email: david.cerny1@gmail.com

## 9 Abstract

10 Shorebirds (Charadriiformes) are a globally distributed clade of modern birds and, due  
11 to their ecological and morphological disparity, a frequent subject of comparative studies.  
12 While molecular phylogenies have been instrumental to resolving the suprafamilial back-  
13 bone of the charadriiform tree, several higher-level relationships, including the monophyly  
14 of plovers (Charadriidae) and the phylogenetic positions of several monotypic families,  
15 have remained unclear. The timescale of shorebird evolution also remains uncertain as a  
16 result of extensive disagreements among the published divergence dating studies, stem-  
17 ming largely from different choices of fossil calibrations. Here, we present the most compre-  
18 hensive non-supertree phylogeny of shorebirds to date, based on a total-evidence dataset  
19 comprising 336 ingroup taxa (89% of all extant species), 24 loci (15 mitochondrial and 9  
20 nuclear), and 69 morphological characters. Using this phylogeny, we clarify the charadri-  
21 iform evolutionary timeline by conducting a node-dating analysis based on a subset of 8  
22 loci tested to be clock-like and 16 carefully selected, updated, and vetted fossil calibra-  
23 tions. Our concatenated, species-tree, and total-evidence analyses consistently support  
24 plover monophyly and are generally congruent with the topologies of previous studies, sug-  
25 gesting that the higher-level relationships among shorebirds are largely settled. However,  
26 several localized conflicts highlight areas of persistent uncertainty within the gulls (Lari-  
27 dae), true auks (Alcinae), and sandpipers (Scolopacidae). At shallower levels, our phylo-  
28 genies reveal instances of genus-level nonmonophyly that suggest changes to currently ac-  
29 cepted taxonomies. Our node-dating analyses consistently support a mid-Paleocene origin  
30 for the Charadriiformes and an early diversification for most major subclades. However,  
31 age estimates for more recent divergences vary between different relaxed clock models, and  
32 we demonstrate that this variation can affect phylogeny-based macroevolutionary studies.  
33 Our findings demonstrate the impact of fossil calibration choice on the resulting divergence  
34 time estimates, and the sensitivity of diversification rate analyses to the modeling assump-  
35 tions made in time tree inference.

36 *Keywords:* Phylogeny; Birds; Charadriiformes; Fossil calibrations; Relaxed molecular clock

## 37 1 Introduction

38 Shorebirds (Charadriiformes) are an ecologically diverse and globally distributed order of  
39 approximately 380 species of neoavian birds (Boyd, 2019; Clements et al., 2019). Given the  
40 variation in habitat use, foraging mode, and behavior present in the group, the Charadri-  
41 iformes have been a frequent subject of comparative research. A number of studies have in-  
42 vestigated the origins and macroevolution of ecological, behavioral, or phenotypic traits in  
43 specific charadriiform genera or families, shedding light on questions such as the evolution  
44 of beak morphology in the Charadrii and Scolopacidae (Barbosa and Moreno, 1999), loco-  
45 motor ecologies in auks and relatives (Smith and Clarke, 2012), migration behaviors in the  
46 *Charadrius* plovers (Joseph et al., 1999), and plumage in gulls and terns (Crochet et al.,  
47 2000; Bridge et al., 2005; Dufour et al., 2020). Despite these efforts, comparative analyses  
48 of shorebird morphology, ecology, and behavior at the ordinal level have been hampered by  
49 the lack of a robust, comprehensive time-calibrated phylogeny for the clade as a whole.

50 A division of Charadriiformes into three suborders has become well-established  
51 since molecular data started to replace or supplement the osteological (Strauch, 1978;  
52 Björklund, 1994; Chu, 1995), syringeal (Brown and Ward, 1990), integumentary (Jehl,  
53 1968; Nielsen, 1975; Dove, 2000), and behavioral (Moynihan, 1959) characters that were  
54 used (often together, e.g. Chu, 1998; Jehl, 1968) to generate the earliest hypotheses of  
55 charadriiform phylogenetic relationships. This three-suborder structure consists of the  
56 Charadrii (plovers, thick-knees, oystercatchers, avocets), Scolopaci (sandpipers, jacanas,  
57 snipes), and the Lari (gulls, terns, skimmers, coursers). This basic structure was first iden-  
58 tified by the DNA-DNA hybridization work of Sibley and Ahlquist (1990). Their phy-  
59 logeny helped resolve the position of several taxa whose charadriiform affinities had been  
60 controversial, such as the auks (Verheyen, 1958; Gysels and Rabaey, 1964) and the plains-  
61 wanderer (Wetmore, 1960; Cracraft, 1981). The inclusion of the auks within Lari sug-  
62 gested by Sibley and Ahlquist (1990) corresponded to early hypotheses suggesting their  
63 close relationship to the gulls (Storer, 1960; Kozlova, 1961), while a sister-group relation-  
64 ship between the plains-wanderer and seedsnipes within Scolopaci corroborated the earlier  
65 morphological study of Olson and Steadman (1981). Topology-wise, Sibley and Ahlquist  
66 (1990) found the Scolopaci as the sister group of (Charadrii + Lari). Later studies using  
67 sequence data altered this topology by placing the Charadrii as sister to a clade formed by  
68 the Scolopaci and Lari, and by recovering the enigmatic buttonquails (Turnicidae), pre-  
69 viously considered to be either gruiforms (Wetmore, 1960; Cracraft, 1981; Rotthowe and  
70 Starck, 1998) or a separate early-branching neoavian order (Sibley and Ahlquist, 1990),  
71 as early-diverging members of the Lari (Paton et al., 2003; Cracraft et al., 2004; Fain and  
72 Houde, 2004; Paton and Baker, 2006; Baker et al., 2007; Fain and Houde, 2007; Hackett  
73 et al., 2008; Hu et al., 2017; Prum et al., 2015).

74 Despite this general consensus, there remain several outstanding questions regard-  
75 ing higher-level charadriiform phylogenetic relationships, some of which concern the po-  
76 sition of several monotypic families. The ibisbill (*Ibidorhyncha struthersii*) has been re-  
77 covered as the sister group to the Recurvirostridae in morphological (Chu, 1995; Livezey,  
78 2010) and supertree (Thomas et al., 2004) studies, while molecular analyses have allied it  
79 with the Haematopodidae (Baker et al., 2007; Chen et al., 2018) or a (Haematopodidae  
80 + Recurvirostridae) clade (hereafter referred to as Haematopodoidea following Cracraft,  
81 2013; Burleigh et al. 2015). The monotypic crab plover (*Dromas ardeola*) was not repre-  
82 sented in the early molecular phylogenetic studies on charadriiforms (Paton et al., 2003;  
83 Paton and Baker, 2006; Baker et al., 2007; Fain and Houde, 2007), and larger phyloge-  
84 nomic studies that did include it failed to sample shorebirds densely enough to unambigu-  
85 ously resolve its position within the order (Hackett et al., 2008; Reddy et al., 2017). Re-  
86 cent molecular evidence indicates a sister-group relationship of *Dromas* to the coursers and  
87 pratincoles (Glareolidae), albeit with varying degrees of support (Pereira and Baker, 2010;  
88 Burleigh et al., 2015; De Pietri et al., 2020; see also the supertree of Kimball et al., 2019).  
89 Finally, the monophyly of lapwings and plovers (Charadriidae) has been contested, with  
90 multiple studies finding the gray and golden plovers (genus *Pluvialis*) to be more closely  
91 related to the Haematopodoidea than to the rest of the family (Baker et al., 2007; Fain  
92 and Houde, 2007; Burleigh et al., 2015; Chen et al., 2018), or to fall outside of the clade  
93 formed by the Haematopodoidea and other plovers (Ericson et al., 2003). This contradicts  
94 the traditional morphological hypothesis of charadriid monophyly (Chu, 1995; Livezey,

2010) as well as the nuclear sequence analysis of Baker et al. (2012), who attributed the earlier molecular results to stochastic gene tree estimation error stemming primarily from the use of fast-evolving mitochondrial loci. However, phylogenies based on complete mitogenomes have since recovered *Pluvialis* within the Charadriidae (Hu et al., 2017; Chen et al., 2018), whereas the taxonomically comprehensive analysis of Burleigh et al. (2015), in which the position of *Pluvialis* was informed by three nuclear loci in addition to mtDNA data, again supported plover paraphyly.

The timescale of charadriiform evolution also remains uncertain due to incongruence among studies employing different types of molecular data and different interpretations of the fossil record. Notably, there is an almost threefold difference between the oldest (95% credible interval: 68–107 Ma; Paton et al., 2003) and the youngest (95% credible interval: 35.1–60.3 Ma; Prum et al., 2015) estimates of the age of the charadriiform root (Figure 1), with the two values implying drastically different scenarios for the tempo and mode of shorebird diversification. Early molecular dating studies based on mitochondrial DNA or small samples of nuclear loci placed the origin of crown shorebirds deep in the Late Cretaceous (Paton et al., 2002, 2003; Pereira and Baker, 2006), and in some cases suggested that many of their interfamilial divergences predated the Cretaceous–Paleogene (K–Pg) boundary (Baker et al., 2007; Brown et al., 2007, 2008; Pereira and Baker, 2008). These divergence time estimates are incompatible with the lack of any Cretaceous fossils that could be reliably attributed not only to charadriiforms (Smith, 2015), but even to neoavians in general (Field et al., 2020), and with phylogenomic evidence for an explosive origin of neoavian orders that largely (Ericson et al., 2006; Jarvis et al., 2014; Kimball et al., 2019; Kuhl et al., 2020) or perhaps entirely (Claramunt and Cracraft, 2015; Cracraft et al., 2015; Prum et al., 2015) postdated the K–Pg boundary, reflecting a rapid radiation into the ecological niches emptied by the Cretaceous–Paleogene mass extinction (Ksepka and Phillips, 2015; Suh, 2016; Berv and Field, 2017).

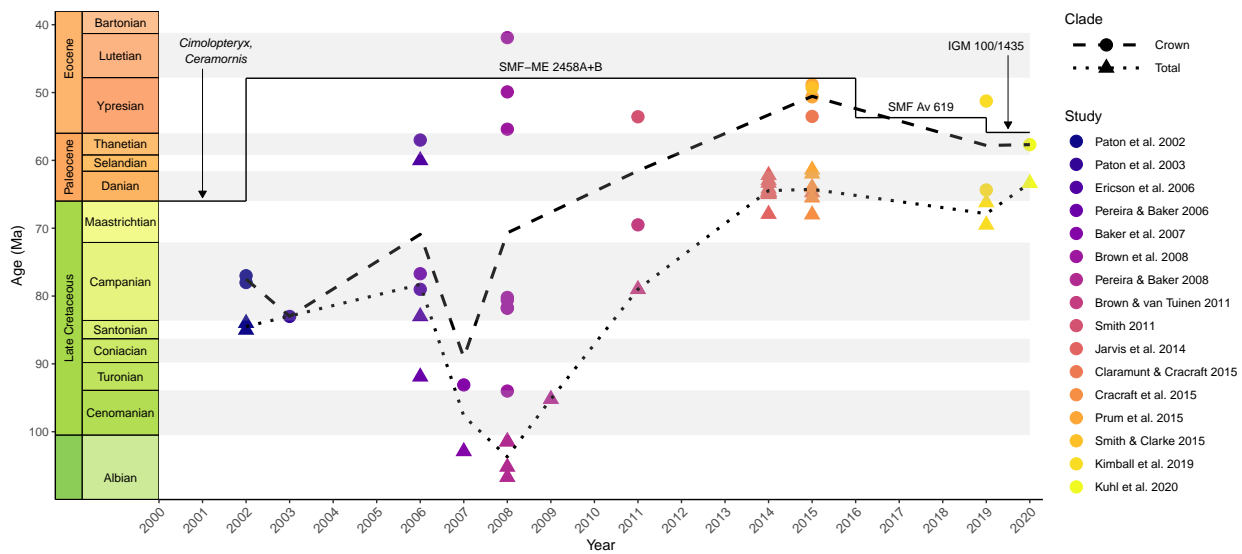

In part, the implausibly old divergence times inferred by early analyses can be attributed to the reliance on mitochondrial data (Brown and van Tuinen, 2011), which fre-

123 quently overestimate node ages as a result of substitution saturation and small effective  
124 population sizes (Zheng et al., 2011; Smith and Klicka, 2013). However, inadequate cal-  
125 ibration choices also play a role (Mayr, 2011; Smith, 2015). A number of early studies  
126 relied primarily on external calibrations phylogenetically distant from the clade of inter-  
127 est (Paton et al., 2002; Pereira and Baker, 2006), or re-used previous and excessively old  
128 divergence time estimates as secondary calibrations (Paton et al., 2003). The choice of  
129 calibration points within the Charadriiformes has been equally problematic, as the rele-  
130 vant taxa were drawn from obsolete fossil compilations without considering more recent  
131 re-assessments. Thus, Baker et al. (2007) calibrated the split between charadriiforms and  
132 their sister group with the ~66 Ma old taxa *Ceramornis* and *Cimolopteryx*, which were re-  
133 garded as charadriiforms by Brodkorb (1967) but subsequently re-evaluated as crown birds  
134 (Neornithes) of uncertain affinities by Hope (2002). Moreover, both fossils may be either  
135 latest Cretaceous or early Paleocene in age (Mayr, 2009), making them poorly constrained  
136 both phylogenetically and stratigraphically. Similar problems extended to nearly all cali-  
137 brations used by Baker et al. (2007) and Pereira and Baker (2008) (see Mayr, 2011; Smith,  
138 2011 for detailed criticisms), rendering the resulting divergence time estimates untrustwor-  
139 thy.

140 More recent node-dating analyses have generally inferred much younger divergence  
141 times for the Charadriiformes (Figure 1), estimating their origin to be younger than the  
142 K–Pg boundary (Jarvis et al., 2014; Kuhl et al., 2020) and often as young as Eocene in  
143 age (Claramunt and Cracraft, 2015; Prum et al., 2015; Kimball et al., 2019). While this  
144 shift to younger dates may have been aided by the transition to more slowly evolving and  
145 less saturated nuclear loci, as well as by the smaller branch length estimation error result-  
146 ing from the use of larger quantities of sequence data (Yang and Rannala, 2005), the fact  
147 that a similar estimate was obtained by a study using a short mtDNA-dominated align-  
148 ment along with carefully vetted calibrations (Smith and Clarke, 2015) points to calibra-  
149 tion choice as a decisive factor. Indeed, a number of recent phylogenomic studies have  
150 cited and followed the “best practices” outlined by Parham et al. (2011), according to  
151 which calibrations should be assigned to nodes based on a list of apomorphies or the re-  
152 sults of phylogenetic analysis, and explicit reasoning should be provided for the conversion  
153 of the available stratigraphic information into numeric ages. However, an overly conser-  
154 vative interpretation of these guidelines may have caused recent studies to over-correct  
155 and disregard pertinent fossil evidence, possibly resulting in the underestimation of di-  
156 vergence times (Figure 1). In the worst case, this bias may even give rise to “zombie lin-  
157 eages” (*sensu* Springer et al., 2017) whose estimated divergence time postdates their first  
158 appearance in the fossil record. For example, Jarvis et al. (2014) used the ~32 Ma old  
159 *Boutersemia* to calibrate the divergence of the Charadriiformes from their sister group, de-  
160 spite the fact that an almost 50% older fossil had already been described by Mayr (2000)  
161 and assigned to the Charadriiformes based on apomorphies determined by outgroup com-  
162 parison. Other fossils older than 32 Ma had been recovered as crown-group charadriiforms  
163 in a formal phylogenetic analysis by Smith (2011), demonstrating that even this more  
164 stringent criterion did not justify basing the calibration on *Boutersemia*.

165 Near-complete species-level phylogenies are increasingly available for many avian  
166 clades (e.g. Garcia-R et al. 2014; Marki et al. 2017; Olsson and Alström 2020), provid-  
167 ing a robust basis for inferences ranging from diversification rate estimation to historical

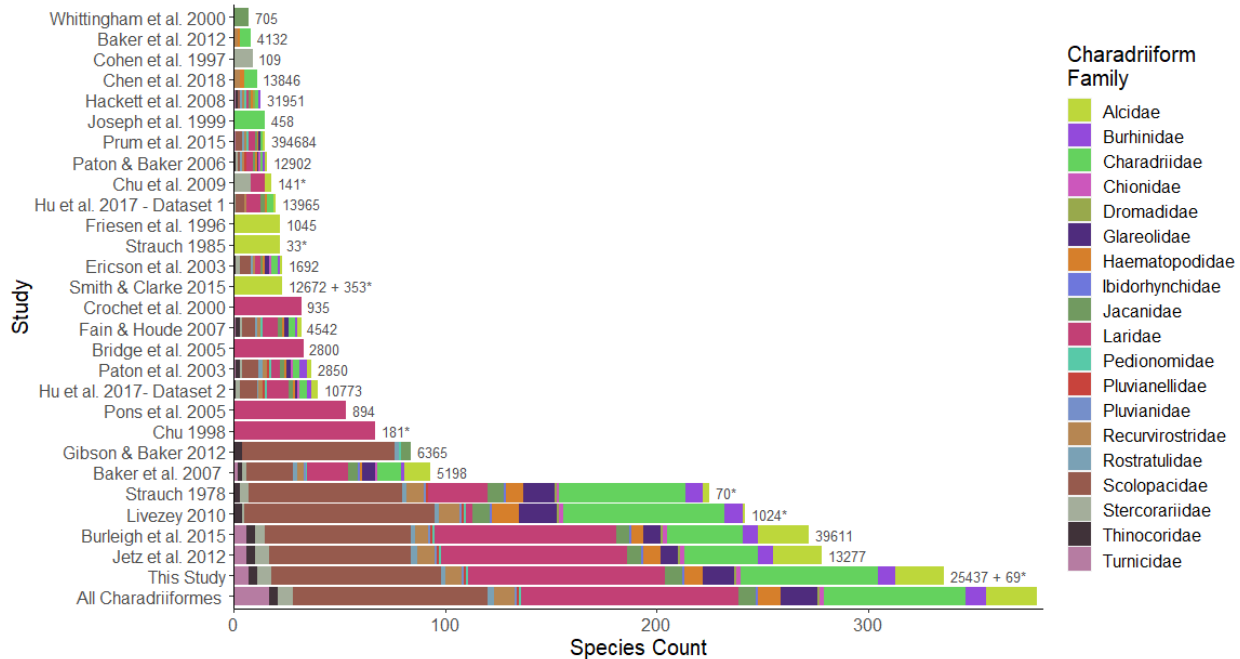

168 biogeography. In shorebirds, however, such phylogenies (summarized in Figure 2) remain  
169 subject to methodological shortcomings and limited data availability. With 227 species,  
170 the charadriiform matrix of Strauch (1978) still represents one of the largest morphologi-  
171 cal phylogenetic datasets ever constructed in terms of the number of taxa, but this early  
172 achievement has not been followed by subsequent morphological and molecular studies,  
173 whose taxon sampling has mostly remained either broad but sparse (Baker et al., 2007;  
174 Mayr, 2011) or dense but narrow (Pons et al., 2005; Smith and Clarke, 2015). As a re-  
175 sult, attempts to construct a comprehensive shorebird phylogeny have so far relied on su-  
176 pertree techniques. The supertree of Thomas et al. (2004) succeeded at including all 350  
177 then-recognized non-turnicid species, but aside from problems inherent to the method used  
178 (Gatesy and Springer, 2004; Bininda-Emonds, 2014), it also suffered from poor resolution  
179 and the reliance on obsolete source trees incompatible with the emerging consensus about  
180 shorebird phylogeny. Using a more advanced “backbone-and-patch” approach, Jetz et al.  
181 (2012) first inferred separate time trees for Charadrii, Scolopaci, Turnicidae, and the non-  
182 turnicid Lari from sequence data, and attached them to a phylogenomic backbone to pro-  
183 duce a set of phylogenies comprising a total of 278 charadriiform species. These were then  
184 expanded to all 369 then-recognized species by using taxonomy to constrain the place-  
185 ment of those taxa for which no molecular data were available, and stochastically resolv-  
186 ing the resulting polytomies. While accommodating uncertainty better than the approach  
187 of Thomas et al. (2004), this workflow, too, suffers from important drawbacks. The infor-  
188 mation about topology and divergence times present in the sequence data is not allowed  
189 to inform the backbone, and the placement of many taxa (> 25% of the extant charadri-  
190 iform diversity) is not based on actual data and may reproduce the errors of previous tax-  
191 onomies. Moreover, the use of birth-death polytomy resolvers may lead to unreliable down-  
192 stream inferences (Rabosky, 2015; Weedop et al., 2019). The more recent phylogeny of



193 Burleigh et al. (2015), based on a single molecular supermatrix, avoided these problems  
194 at the cost of reduced taxon sampling (272 charadriiform species; Figure 2).

195 Here, we assemble the most comprehensive molecular dataset for the Charadri-  
196 iformes to date, and combine it with a pre-existing morphological character matrix to esti-  
197 mate the phylogenetic interrelationships of 336 species of shorebirds ( $\sim 89\%$  of the extant  
198 diversity). This taxon sample substantially exceeds that of any previous study not based  
199 on supertrees or stochastic polytomy resolvers (Figure 2), making it possible to address  
200 outstanding areas of uncertainty due to insufficient sampling. Furthermore, we combine  
201 the resulting comprehensive total-evidence phylogeny with an up-to-date, extensively vet-  
202 ted set of 16 fossil calibrations to resolve the controversial timescale of shorebird evolution,  
203 and show how inferences about the tempo and mode of charadriiform diversification are  
204 sensitive to the estimated divergence times.

## 205 **2 Material and methods**

### 206 **2.1 Data assembly and alignment**

207 We obtained published sequences from GenBank (Benson et al., 2013) using Geneious  
208 (Kearse et al., 2012) or manual queries via the NCBI web interface. To ensure all avail-  
209 able data was obtained, taxonomic coverage was further checked against a previous study  
210 attempting to comprehensively sample charadriiform species represented by molecular data  
211 (Burleigh et al., 2015). Taxonomy followed the Taxonomy in Flux (TiF) checklist (Boyd,  
212 2019), which includes splitting of the traditionally broad genera *Charadrius*, *Larus*, and  
213 *Sterna*. A custom synonym dictionary and R script (R Core Team, 2019) were used to rec-  
214 oncile differences between the NCBI taxonomy and the TiF checklist.

215 To date, phylogenomic analyses have not conclusively identified the sister group  
216 of shorebirds (Hackett et al., 2008; Kimball et al., 2013; McCormack et al., 2013; Yuri  
217 et al., 2013; Jarvis et al., 2014; Burleigh et al., 2015; Prum et al., 2015). The Charadri-  
218 iformes represent one of the six (Houde et al., 2019) to nine (Suh, 2016) major neoavian  
219 lineages whose interrelationships remain unresolved even with genome-scale data (Jarvis  
220 et al., 2014; Prum et al., 2015; Reddy et al., 2017), and which may constitute a hard poly-  
221 tomy (Suh et al., 2015; Suh, 2016). Here, we chose a gruiform species as the outgroup,  
222 as the Gruiformes were found to be the sister group of shorebirds in two recent genome-  
223 scale analyses (Jarvis et al., 2014; Kuhl et al., 2020). This hypothesis is also supported  
224 by phylogenetic analyses of phenotypic data from extant taxa (McKittrick, 1991; Livezey  
225 and Zusi, 2007) and a high degree of morphological similarity between the early members  
226 of both clades (Musser and Clarke, 2020). To maximize data coverage for this outgroup,  
227 we specifically selected the Gray-crowned Crane (*Balearica regulorum*), a taxon for which  
228 both the complete nuclear genome (Zhang et al., 2014) and the complete mitochondrial  
229 genome (Krajewski et al., 2010) are available.

230 In assembling our dataset, we selected loci with the largest number of available se-  
231 quences, and required at least 20 species to have available data for each gene to exclude  
232 low-coverage loci. The final sample included 2 mitochondrial ribosomal genes, 13 mito-  
233 chondrial protein-coding genes, and 9 nuclear protein-coding genes represented by intronic

234 and/or exonic sequences (Table 1). We aligned the sequences using MUSCLE (Edgar,  
 235 2004) as implemented in Geneious (Kearse et al., 2012) or as a standalone program. Align-  
 236 ments were visually inspected in AliView (Larsson, 2014) and manually edited if necessary.  
 237 Reading frames in exonic sequences were identified using amino acid translation and were  
 238 employed to check for poorly aligned sequences. A custom R script was used to exclude  
 239 sequences consisting entirely of gaps or undetermined nucleotides.

| Code                 | Gene                                                           | Aligned length (bp) | Species sampled | Avg. pairwise identity (%) |
|----------------------|----------------------------------------------------------------|---------------------|-----------------|----------------------------|
| <i>Mitochondrial</i> |                                                                |                     |                 |                            |
| 12S                  | 12S ribosomal RNA                                              | 1044                | 194             | 84.0                       |
| 16S                  | 16S ribosomal RNA                                              | 1735                | 113             | 82.5                       |
| ATP6                 | ATP synthase membrane subunit 6                                | 675                 | 84              | 83.0                       |
| ATP8                 | ATP synthase membrane subunit 8                                | 175                 | 73              | 79.7                       |
| COX1                 | Cytochrome <i>c</i> oxidase subunit I                          | 1552                | 248             | 85.9                       |
| COX2                 | Cytochrome <i>c</i> oxidase subunit II                         | 691                 | 63              | 85.8                       |
| COX3                 | Cytochrome <i>c</i> oxidase subunit III                        | 784                 | 57              | 86.9                       |
| CytB                 | Cytochrome <i>b</i>                                            | 1204                | 261             | 84.0                       |
| ND1                  | NADH dehydrogenase subunit 1                                   | 988                 | 74              | 83.0                       |
| ND2                  | NADH dehydrogenase subunit 2                                   | 1059                | 210             | 81.7                       |
| ND3                  | NADH dehydrogenase subunit 3                                   | 352                 | 92              | 84.0                       |
| ND4                  | NADH dehydrogenase subunit 4                                   | 1378                | 60              | 83.0                       |
| ND4L                 | NADH dehydrogenase subunit 4L                                  | 290                 | 60              | 83.4                       |
| ND5                  | NADH dehydrogenase subunit 5                                   | 1832                | 92              | 83.8                       |
| ND6                  | NADH dehydrogenase subunit 6                                   | 527                 | 70              | 83.2                       |
| <i>Nuclear</i>       |                                                                |                     |                 |                            |
| ADNH                 | Alcohol dehydrogenase 1, exon 5 to exon 6                      | 883                 | 54              | 90.0                       |
| ALDOB                | Fructose-bisphosphate aldolase B, exon 3 to exon 8             | 2217                | 27              | 84.8                       |
| BDNF                 | Brain-derived neurotrophic factor                              | 689                 | 22              | 97.5                       |
| CMOS                 | Oocyte maturation factor Mos                                   | 648                 | 23              | 95.0                       |
| FGB7                 | Beta-fibrinogen, intron 7                                      | 1336                | 70              | 83.6                       |
| GAPDH                | Glyceraldehyde-3-phosphate dehydrogenase, intron 3 to intron 5 | 802                 | 28              | 81.0                       |
| MB2                  | Myoglobin, intron 2                                            | 708                 | 61              | 92.3                       |
| NTF3                 | Neurotrophin-3                                                 | 730                 | 23              | 96.9                       |
| RAG1                 | Recombination activating gene 1                                | 3138                | 190             | 92.9                       |

Table 1: Information for the 24 loci used to construct the concatenated alignment. The table includes alignment length, number of sequences available (based on the TiF taxonomy and after the exclusion of conspecifics), and average pairwise identity.

240 In addition to molecular data, we also employed the morphological matrix of  
 241 Strauch (1978), which we first modified based on the recommendations of Chu (1995).  
 242 After the modifications, the matrix comprised a total of 69 characters scored for 225  
 243 taxa, including 61 parsimony-informative characters and 8 autapomorphies. Unlike the  
 244 molecular alignment, the morphological matrix did not include an outgroup.

## 245 2.2 Gene tree and species tree analyses

246 We subjected the 24 individual gene alignments to two iterations of tree searches to iden-  
 247 tify mislabeled and conspecific sequences. Preliminary maximum likelihood (ML) gene  
 248 trees were inferred using RAxML v8.2.12 (Stamatakis, 2014) under the general time-  
 249 reversible model with discrete gamma-distributed among-site rate variation (GTR+ $\Gamma$ ), no  
 250 codon position partitioning, and the slower but more thorough traditional search option  
 251 (-f o). The resulting trees were inspected and accessions that violated the monophyly of



252 well-established families were regarded as mislabeled. In addition, conspecific sequences  
253 were excluded at this stage; whenever the sequences were not identical, only the most  
254 complete one was retained.

255 The pruned alignments were then refined using MUSCLE and used for the sec-  
256 ond iteration of gene tree inference. Main tree searches followed the same settings as in  
257 the first iteration. Additionally, RAxML bootstrap analyses with 1000 pseudoreplicates  
258 were performed for all nuclear genes. A different treatment was applied to the mitochon-  
259 drial loci, which constitute a single nonrecombinant unit or “superlocus” due to linkage,  
260 and are therefore not expected to provide independent estimates of the species tree (Reyes  
261 et al., 2004; Brown and van Tuinen, 2011; Richards et al., 2018). To account for this non-  
262 independence, we concatenated the pruned and refined alignments for all mitochondrial  
263 loci using the Python package PHYLUCE (Faircloth, 2015). To find the best partitioning  
264 scheme for the mitochondrial genome as a whole, we initialized PartitionFinder 2 (Lan-  
265 fear et al., 2016) with a scheme partitioned both by locus and by codon position for the  
266 protein-coding genes (41 partitions) and performed a greedy search using the Bayesian In-  
267 formation Criterion (BIC) to evaluate model fit. The set of candidate substitution models  
268 was restricted to those implemented in RAxML. The best-fit scheme consisted of 13 par-  
269 titions, all of which favored either the GTR+ $\Gamma$  or GTR+ $\Gamma$ +I model. However, since the  
270  $\Gamma$  and I parameters are not identifiable (Yang, 2014), we chose to analyze the mitogenome  
271 alignment with GTR+ $\Gamma$  assigned to all partitions. Except for partitioning, the RAxML  
272 settings for the main tree search and bootstrapping followed those applied to other gene  
273 tree analyses.

274 To accommodate potential gene tree conflict due to incomplete lineage sorting  
275 (ILS) or hybridization, we used ASTRAL-III v5.7.3 (Mirarab et al., 2014b; Zhang et al.,  
276 2018) to infer a species tree. Given a profile of unrooted and possibly only partially re-  
277 solved gene trees, ASTRAL-III performs a limited tree search restricted to combinations of  
278 bipartitions observed in the source trees to find the species tree sharing the largest number  
279 of induced quartets with the profile. Assuming error-free gene trees, this method repre-  
280 sents an estimator of the species tree topology that is statistically consistent even in the  
281 presence of heavy ILS which renders concatenation-based approaches positively misleading  
282 (Degnan and Rosenberg, 2006; Mirarab et al., 2014b,a). To minimize gene tree error, we  
283 collapsed all branches with bootstrap support of <10% using a custom R script. The cut-  
284 off was chosen based on previous simulation results showing this value to outperform both  
285 unfiltered analyses and more aggressive filtering (Zhang et al., 2018). The 1,000 bootstrap  
286 pseudoreplicates inferred for each of the 10 gene trees (9 nuclear loci and the mitogenome)  
287 were used to expand the search space but did not affect the quartet score, which was  
288 calculated from the ML estimates alone. We used the `-t 2` flag to annotate the species  
289 tree with internal branch lengths in coalescent units (inversely proportional to the amount  
290 of gene tree discordance if the latter were due entirely to ILS), the effective number of  
291 genes per branch (Sayyari and Mirarab, 2018), and local posterior probabilities (localPP;  
292 Sayyari and Mirarab, 2016). The localPP metric is a conservative measure of support that  
293 assumes error-free gene trees and the perfect accuracy of the four subtrees surrounding  
294 the focal branch. Its value depends on the frequency with which the branch appears in the  
295 input gene trees, as well as the total number of gene trees evaluated (Sayyari and Mirarab,  
296 2016).

297 The resulting ASTRAL tree included multiple quadripartitions whose quartet sup-  
298 port was lower than that of the alternatives, including two at the interfamilial level (in-  
299 volving *Pluvianus* and *Dromas*; see Results). To determine whether this was due to in-  
300 teraction between adjacent quadripartitions (whereby the inclusion of a better-supported  
301 alternative would decrease the quartet support of surrounding branches), or merely the  
302 failure of ASTRAL to sufficiently explore the search space, we quantified the support for  
303 alternative topologies differing in the positions of the two taxa. As there are three possible  
304 resolutions for each of the two quadripartitions of interest, with one of their 9 combina-  
305 tions already included in the best tree, we scored an additional 8 topologies using the `-q`  
306 flag and compared them to the best ASTRAL estimate in terms of overall quartet support.  
307 We used DiscoVista (Sayyari et al., 2018) to visualize the quartet frequencies and exam-  
308 ine the relative strength of gene tree discordance with respect to the best-supported and  
309 alternative interfamilial relationships.

### 310 **2.3 Concatenated analyses**

311 We used PHYLUCE (Faircloth, 2015) to concatenate the pruned and refined alignments  
312 of all 24 genes, and calculated the partial decisiveness (Sanderson et al., 2010) of the re-  
313 sulting supermatrix using the Python package SUMAC (Freyman, 2015). To identify the  
314 best partitioning scheme, we provided PartitionFinder2 (Lanfear et al., 2016) with an ini-  
315 tial scheme consisting of 94 partitions (2 for the ribosomal RNA genes, 39 for the three  
316 codon positions of the 13 mitochondrial protein-coding loci, 42 for the three codon posi-  
317 tions of the 14 nuclear exons, and 11 for nuclear introns). A greedy search using the BIC  
318 score for model comparison found the best scheme to comprise 22 partitions. Having as-  
319 signed a separate GTR+ $\Gamma$  model to each partition, we then used this scheme to perform  
320 another RAxML analysis as well as a bootstrap run of 1000 pseudoreplicates.

321 The use of resampling techniques, such as bootstrap, for measuring branch support  
322 has recently been criticized, since their application to phylogenomic-scale data is likely to  
323 result in high values even in the presence of substantial intra-dataset conflict (Salichos  
324 and Rokas, 2013; Suh, 2016). To take this criticism into account, we further estimated  
325 internode certainty (IC; Salichos and Rokas, 2013; Salichos et al., 2014; Kobert et al.,  
326 2016) for every branch of our ML tree. IC is an entropy-based measure of incongruence  
327 that is calculated for a reference tree based on a collection of (partial) alternative trees. It  
328 ranges from 1 (in the case of no conflict) through 0 (if the bipartition in the reference tree  
329 is present in the same percentage of trees as the most prevalent conflicting bipartition) to  
330 negative values (if there are more frequent alternatives to the bipartition present in the  
331 reference tree; Kobert et al. 2016). Since IC is only robust as a measure of support when  
332 the collection of alternative trees is sufficiently large (Salichos et al., 2014), we chose to use  
333 the bootstrap set for this purpose, and scored the ML tree accordingly using the `-f i -t`  
334 RAxML flags.

335 In addition to the ML analysis, we also performed Bayesian phylogenetic inference  
336 using ExaBayes v1.5 (Aberer et al., 2014) via the CIPRES portal (Miller et al., 2010).  
337 We used the best partitioning scheme described above, with a separate GTR+ $\Gamma$  substi-  
338 tution model for each partition and branch lengths linked across partitions. We placed flat  
339 Dirichlet priors on the exchangeability and state frequency vectors, a  $U(0, 200)$  prior on

340 the shape parameter of the  $\Gamma$  distribution, and an  $\text{Exp}(10)$  prior on branch lengths (all de-  
341 faults). A total of 4 independent runs were executed, each consisting of one cold and three  
342 incrementally heated Metropolis-coupled chains of 5 million generations. Convergence was  
343 assessed by ensuring that the average standard deviation of split frequencies (ASDSF) did  
344 not exceed 5% and by visually inspecting trends in scalar parameter values along each  
345 chain in Tracer v1.7 (Rambaut et al., 2018). This led us to exclude one of the 4 runs and  
346 set the burn-in proportion for the remaining three to 40%, which ensured that the effective  
347 sample sizes (ESS) exceeded 200 for all but 5 of the 246 continuous parameters. Finally,  
348 after the first 40% of trees were removed from each file, we combined the tree files from  
349 the three runs and used the program ‘consense’ from the ExaBayes suite to generate the  
350 extended majority-rule (MRE) consensus tree.

351 To identify which regions of the ML and Bayesian trees may have been affected by  
352 alignment incompleteness, we used the protocol introduced by McCraney et al. (2020) to  
353 calculate per-branch locus coverage, i.e., the number of genes informative (but not nec-  
354 essarily supportive) with respect to a given branch. We first pruned both trees down to  
355 the species sampled for each of the 24 genes, and used ASTRAL-III (Zhang et al., 2018)  
356 with the `-q` and `-t 2` flags to score and annotate the original RAxML and ExaBayes trees  
357 based on the resulting set of subsampled trees. Since the pruned trees only differ from  
358 the reference trees in terms of taxon coverage rather topology, the effective number of loci  
359 computed by ASTRAL (defined as the number of gene trees that contain one of the three  
360 possible quartets around the branch of interest; Sayyari et al. 2018) is simply equal to per-  
361 branch locus coverage.

## 362 2.4 Combined analyses

363 We employed two different methods to expand our taxon sample by including species rep-  
364 resented only by morphological data. First, we combined the concatenated alignment with  
365 the morphological character matrix of Strauch (1978), modified as described above. The  
366 resulting total-evidence supermatrix consisted of 27 partitions: 22 for the nucleotide data,  
367 delimited according to the best scheme described above; and 5 for the morphological char-  
368 acters, which were grouped into partitions according to the number of states (ranging from  
369 2 to 6). This supermatrix was analyzed using RAxML-NG (Kozlov et al., 2019) after as-  
370 signing the GTR model to the nucleotide partitions and appropriate  $Mk$  models (with  $k$   
371 again ranging from 2 to 6) to the morphological partitions. A  $\Gamma$  distribution discretized  
372 into 4 categories was used to account for among-site rate variation within all models ex-  
373 cept those applied to the 5-state and 6-state morphological partitions, which contained  
374 fewer characters than there were rate categories. Since the matrix of Strauch (1978) only  
375 contained variable characters, an ascertainment bias correction (Lewis, 2001) was applied  
376 to all morphological models. We conducted 100 tree searches (with 50 random and 50 par-  
377 simony starting trees) followed by a bootstrap analysis with 1000 pseudoreplicates run on  
378 the CIPRES Science Gateway (Miller et al., 2010). In these total-evidence (TE) analyses,  
379 the morphological characters helped determine the overall topology of the tree by inform-  
380 ing the relationships among taxa represented by both morphological and molecular data.

381 Second, we performed an alternative analysis using the evolutionary placement  
382 algorithm (EPA; Berger and Stamatakis, 2010; Berger et al., 2011), in which the ML

383 estimate from the concatenated analysis served as a fixed molecular scaffold, and the  
384 contribution of the morphological characters was limited to attaching to this scaffold the  
385 31 species from Strauch's (1978) matrix that lacked sequence data. To achieve this, we  
386 first pruned the 306-tip concatenated ML tree down to the 194 tips that were represented  
387 by both molecular and morphological data, and then used RAxML (-f u) to compute  
388 weights for the 69 characters based on their fit to this subsampled reference phylogeny,  
389 expressed in terms of per-site log likelihood scores (Berger et al., 2011). Since the weights  
390 were equal for all characters, we ran an unweighted EPA analysis using the -f v RAxML  
391 flag on the complete 306-tip scaffold. Next, we passed the resulting .jplace files to the  
392 program GAPP (Czech et al., 2020) and grafted the morphology-only taxa onto the  
393 molecular scaffold at their most likely insertion positions. To obtain a strictly bifurcating  
394 topology comparable to the TE tree, we ran GAPP with the --fully-resolve flag,  
395 allowing the edges of the scaffold tree to be split by the insertion edges according to the  
396 proximal length of the placements. Finally, we used a suite of likelihood tests implemented  
397 in IQ-TREE v1.6.12 (Nguyen et al., 2014), including the Shimodaira-Hasegawa (SH; Shi-  
398 modaira and Hasegawa, 1999) and approximately unbiased (AU; Shimodaira, 2002) tests,  
399 to compare the fit of the TE and EPA trees to the combined dataset.

## 400 2.5 Fossil calibrations

401 We assembled a total of 16 calibrations (Table 2): 9 from a recently published, expert-  
402 vetted compendium (Smith, 2015), two that were utilized in a previous divergence time  
403 analysis (De Pietri et al., 2020), and 5 that were used here for the first time. Eight out  
404 of the 16 calibrations were described in or after 2010; 4 were described in or after 2015.  
405 All calibrations were thoroughly vetted to ensure compliance with the criteria of Parham  
406 et al. (2011). The 11 calibrations taken from earlier studies were revised following recent  
407 geochronological and phylogenetic studies; in all cases, this resulted in changes to their nu-  
408 meric ages, and in one case, the reassignment of a calibration to a different node (see Sup-  
409 plementary Information for details). We paid particular attention to the choice of the root  
410 calibration, since multiple fossils have been put forward as the earliest known shorebird  
411 remains (Mayr, 2000, 2016; Smith, 2015; Hood et al., 2019). In particular, a recent phy-  
412 logenetic analysis suggested a crown-charadriiform affinity for at least two fossils dating  
413 to the early Eocene (Musser and Clarke, 2020). However, the resulting trees either exhib-  
414 ited a lack of resolution within Charadriiformes or contradicted well-established molecular  
415 results, rendering the placement of the fossils within the crown inconclusive.

416 To assess the confidence in the phylogenetic position of the early Eocene fossils, we  
417 re-analyzed the morphological character matrix of Musser and Clarke (2020) under three  
418 sets of "soft" topological constraints which fixed the relationships among most of the ex-  
419 tant taxa but allowed the 8 included fossils to attach anywhere in the tree. The constraints  
420 enforced interfamilial relationships within all orders represented by more than two taxa  
421 (Anseriformes, Charadriiformes, Gruiformes) in addition to all applicable supraordinal re-  
422 lationships from three recent avian phylogenomic trees (Prum et al., 2015; Reddy et al.,  
423 2017; Kimball et al., 2019). Note that in the analyses of Musser and Clarke (2020), the in-  
424 terfamilial relationships within Charadriiformes were left unconstrained, and the supraor-  
425 dinal relationships were only selectively enforced. All three analyses were performed us-

| #  | Fossil                                                                | Node calibrated                                          | $t_L$ (Ma) | $t_U$ (Ma) | Density                |
|----|-----------------------------------------------------------------------|----------------------------------------------------------|------------|------------|------------------------|
| 1  | CASG 71892 ( <i>Uria lomvia</i> )                                     | <i>Uria lomvia</i> + <i>U. aalge</i>                     | 2.58       | 44.01      | Cauchy ( $c = 1.264$ ) |
| 2  | <i>Miocepphus bohaskai</i>                                            | <i>Uria</i> + <i>Alle</i>                                | 18.1       | 57.62      | Cauchy ( $c = 0.172$ ) |
| 3  | <i>Synthliboramphus rineyi</i>                                        | <i>Synthliboramphus craveri</i> + <i>S. hypoleucus</i>   | 1.73       | 43.89      | Cauchy ( $c = 1.918$ ) |
| 4  | <i>Cepphus olsoni</i>                                                 | <i>Cepphus columba</i> + <i>C. carbo</i>                 | 6.6        | 44.48      | Cauchy ( $c = 0.452$ ) |
| 5  | <i>Brachyramphus dunkeli</i>                                          | <i>Brachyramphus marmoratus</i> + <i>B. brevirostris</i> | 1.73       | 43.89      | Cauchy ( $c = 1.918$ ) |
| 6  | USNM 192994, USNM 215783<br>( <i>Fratercula</i> cff. <i>arctica</i> ) | <i>Fratercula arctica</i> + <i>F. corniculata</i>        | 3.92       | 32.03      | Cauchy ( $c = 0.564$ ) |
| 7  | <i>Aethia barnesi</i>                                                 | Crown-group Fraterculinae                                | 6.6        | 44.48      | Cauchy ( $c = 0.452$ ) |
| 8  | GCVP 5690                                                             | Crown-group Alcoidea                                     | 34.44      | 70.04      | Cauchy ( $c = 0.081$ ) |
| 9  | <i>Mirolia</i> spp.                                                   | Crown-group Arenariinae                                  | 12.6       | 37.77      | Cauchy ( $c = 0.157$ ) |
| 10 | <i>Gallinago azovica</i>                                              | <i>Gallinago</i> + <i>Coenocorypha</i>                   | 6.1        | 28.39      | Cauchy ( $c = 0.288$ ) |
| 11 | <i>Elorius</i> spp., <i>Parvelorius</i> spp.                          | Crown-group Scolopacidae                                 | 20.0       | 48.32      | Cauchy ( $c = 0.111$ ) |
| 12 | <i>Nupharanassa tolutaria</i>                                         | Crown-group Jacanoidea                                   | 30.5       | 59.12      | Cauchy ( $c = 0.074$ ) |
| 13 | <i>Oligonomus milleri</i>                                             | Crown-group Thinocoroidea                                | 24.47      | 48.98      | Cauchy ( $c = 0.079$ ) |
| 14 | NMB S.G.20252                                                         | Crown-group Haematopodoidea                              | 20.0       | 68.50      | Cauchy ( $c = 0.191$ ) |
| 15 | <i>Chionoides australiensis</i>                                       | Crown-group Chionida                                     | 24.76      | 68.94      | Cauchy ( $c = 0.140$ ) |
| 16 | IGM 100/1435                                                          | Crown-group Charadriiformes                              | 55.88      | 66.0       | Soft-bounded uniform   |

Table 2: Fossil calibrations used for divergence time estimation. Specimen numbers are given for remains belonging to extant species and fossils not assigned to a named species.  $t_L$  = minimum,  $t_U$  = soft maximum (95th percentile), Cauchy = truncated Cauchy distribution with scale parameter  $ct_L$  (Inoue et al., 2009), Soft-bounded uniform = uniform distribution  $U(t_L, t_U)$  with a power-decay left tail  $(0, t_L)$  and an exponential-decay right tail  $(t_U, \infty)$  (Yang and Rannala, 2005). Detailed justification and additional references for the choice of calibrations and their numeric ages are provided in Supplementary Information.

ing MrBayes v3.2.6 (Ronquist et al., 2012b) under the  $Mk+\Gamma$  substitution model and an Exp(10) branch length prior. For each analysis, we ran 4 independent replicates, each with 4 Metropolis-coupled chains (three of which were incrementally heated) of 20 million generations. After discarding the first 40% of states as burn-in, we verified that the analyses reached convergence based on the ASDSF ( $<0.01$ ), ESS values for scalar parameters ( $>200$ ), and potential scale reduction factor (PSRF;  $\sim 1.00$ ). Finally, we used the MRE consensus tree to summarize the post-burn-in posterior sample.

A long-recognized problem of node-dating analyses is the fact that fossil calibrations can only provide a reliable lower bound on the age of any given clade (Yang and Rannala, 2005; Benton and Donoghue, 2006; Wilkinson et al., 2010). To avoid arbitrary upper bounds, we used a simple, Bayesian method devised by Hedman (2010) and first applied to fossil calibration design by Friedman et al. (2013). In this approach, the age of origin of a clade is informed by the sequence of the first appearance dates of its successive outgroups. The algorithm starts with the assumption that the age of the node connecting the most distant outgroup to the clade of interest is uniformly distributed between the first appearance of that outgroup and some arbitrary upper bound  $t_0$ . The next outgroup diverges at a time that is uniformly distributed between its own first appearance date and the divergence time of the previous outgroup, integrating over the uncertainty in the latter. The process is then repeated until a non-uniform posterior distribution is obtained on the interval  $[t_L, t_0]$ , where  $t_L$  is the oldest known fossil belonging to the clade of interest (Hedman, 2010). Following Friedman et al. (2013), we took the conservative approach of excluding stratigraphically inconsistent outgroups (i.e., those that appear later in the fossil record despite diverging earlier). Together with the uncertain relationships within Neoaves (Jarvis et al., 2014; Prum et al., 2015; Suh, 2016) and the fact that few neornithine lineages predate the oldest known charadriiform occurrence from the Paleocene/Eocene boundary (Mayr, 2014; Ksepka et al., 2017), this required extending the



452 outgroup sequence into the neornithine stem group. We used recent phylogenies of Meso-  
453 zoic birds to construct several alternative sequences (Supplementary Information). After  
454 setting  $t_0 = 160$  Ma and evaluating the node age distributions at 1000 discrete time steps,  
455 we calculated the 95% credibility interval (CI) for the age of each calibrated node. We  
456 then averaged the 95% CI upper bounds across the different outgroup sequences to ac-  
457 count for phylogenetic uncertainty, and used the resulting value as a soft maximum when  
458 designing the corresponding calibration density (Table 2).

459 While parameter-rich calibration densities offer substantial flexibility (Brown and  
460 van Tuinen, 2011), they also run the risk of being arbitrary, since it is frequently only the  
461 minimum and the maximum age that can be objectively determined for a given calibration  
462 (but see Wilkinson et al., 2010; Claramunt and Cracraft, 2015). Arbitrarily specified pa-  
463 rameters can have a huge impact on the resulting node age posteriors (Inoue et al., 2009;  
464 Warnock et al., 2012). To avoid this, we constrained the truncated Cauchy densities imple-  
465 mented in the program MCMCTree (Yang, 2007; Inoue et al., 2009) to approximate two-  
466 parameter offset exponentials, which are fully determined by their minimum (offset) and  
467 soft maximum (95th percentile). Starting with a truncated Cauchy distribution of the form  
468  $t \sim L(t_L, p, c, p_L)$ , we set  $p_L$  (the probability of violating the lower bound  $t_L$ ) to  $10^{-300}$  to  
469 approximate a hard minimum, and fixed  $p$  (the offset of the mode from the minimum) to  
470 0 to ensure the monotonic decline of the density function after the fossil-based minimum.  
471 Finally, we analytically calculated  $c$  (parameter controlling the rate of the decline; Table 2)  
472 to ensure that 95% of the total probability mass would be located between the fossil-based  
473 hard minimum  $t_L$  and the soft maximum  $t_U$  estimated using the outgroup method. Since  
474 MCMCTree does not accept Cauchy densities at the root of the tree, a soft-bounded uni-  
475 form density was used instead for the root calibration (Table 2).

## 476 **2.6 Divergence time estimation**

477 We used the program MCMCTree from the PAML v4.9j suite (Yang, 2007) to estimate  
478 node ages on the fixed topology of the total-evidence RAXML-NG tree based on the 16  
479 fossil calibrations described above. We performed a number of preliminary analyses that  
480 either had difficulty reaching stationarity, even after very long Markov chain Monte Carlo  
481 (MCMC) runs, or were found to be computationally intractable due to the large number  
482 of partitions used (Supplementary Information). Comparisons with additional test runs  
483 sampling from the prior suggested that these problems were caused by the misspecification  
484 of the relaxed clock priors, large amounts of rate heterogeneity across the alignment, and  
485 nonrandom distribution of missing data across the tree. To mitigate these issues, we set  
486 out to identify a subset of our sequences evolving in a homogeneous and a relatively clock-  
487 like manner.

### 488 **2.6.1 Locus filtering**

489 Using the R packages adephylo (Jombart et al., 2010), phangorn (Schliep, 2010), and phy-  
490 tools (Revell, 2012), we reimplemented the SortaDate pipeline (Smith et al., 2018) to carry  
491 out a multistep filtering workflow on the gene trees described in section 2.2. In SortaDate,  
492 individual gene trees are evaluated for their length (correlated with the rate of evolution),



493 root-to-tip path length variance (a proxy for rate heterogeneity across lineages), and per-  
494 centage of bipartitions shared with a reference tree (quantifying topological congruence  
495 with the species tree to be dated). We used the total-evidence RAxML-NG phylogeny as  
496 our reference tree, and after pruning it down to the taxon sample of a given gene tree, we  
497 calculated the percentage of shared bipartitions as  $1 - d/(2n - 6)$ , where  $d$  is the unnor-  
498 malized Robinson-Foulds (RF) distance (Robinson and Foulds, 1981) and  $n$  is the number  
499 of tips represented by sequence data for the gene in question.

500 Despite our overall focus on rate homogeneity, we chose to include CytB (the least  
501 clock-like of all the genes examined: root-to-tip path length variance = 0.0248) in the fil-  
502 tered set of loci because of its high taxonomic coverage (Table 1). Next, we excluded four  
503 loci sharing fewer than 50% bipartitions with the reference tree, and ranked the remaining  
504 19 loci from the most ( $7.72 \times 10^{-5}$ ) to the least (0.0208) clock-like. We then kept adding  
505 loci in this order until the cumulative taxon sample included all 306 species for which at  
506 least some molecular data were available. The final dataset consisted of 8 loci comprising  
507 10,883 base pairs: ADNH, ALDOB, COX1, CytB, GAPDH, ND3, NTF3, and RAG1.

## 508 **2.6.2 Relaxed clock hyperpriors**

509 We used the program BASEML (Yang, 2007) bundled with MCMCTree to estimate the  
510 mean substitution rate for the 8-locus dataset under a strict molecular clock. A single cali-  
511 bration was placed at the root of the tree and assigned a point-mass prior set to the mean  
512 of the soft uniform density to be used for the subsequent divergence time analysis (Ta-  
513 ble 2). We used a time unit of 10 million years, resulting in a value of 6.108 assigned to  
514 the root prior. The maximum likelihood estimate of the substitution rate was  $2.456 \times 10^{-9}$   
515 substitutions per site per year ( $\text{ss}^{-1}\text{y}^{-1}$ ), which we used as the mean of a diffuse gamma  
516 hyperprior on the mean clock rate hyperparameter (`rgene_gamma`) with shape  $\alpha = 2$ , rate  
517  $\beta = 81.44$ , and the 95% prior CI of  $[2.965 \times 10^{-10}, 6.852 \times 10^{-9}] \text{ss}^{-1}\text{y}^{-1}$ . Following Mc-  
518 Gowen et al. (2019), we placed a gamma hyperprior with shape  $\alpha = 2$  and rate  $\beta = 2$  on  
519 the variance of the logarithm of the clock rate (`sigma2_gamma`). Assuming mean values for  
520 both hyperpriors, these choices specified a highly diffuse prior distribution of branch rates  
521 (95% prior CI:  $[2.641 \times 10^{-10}, 1.326 \times 10^{-8}] \text{ss}^{-1}\text{y}^{-1}$ ), intended to accommodate the large  
522 amount of expected rate heterogeneity among genome types (nuclear vs. mitochondrial)  
523 and codon positions.

## 524 **2.6.3 Bayesian clock model selection**

525 We used Bayes factors to compare two relaxed clock models implemented in MCMC-  
526 Tree. Specifically, we evaluated the marginal likelihoods and posterior probabilities of the  
527 uncorrelated or independent-rates (IR) model, in which branch rates are drawn from a  
528 lognormal distribution whose mean and variance are themselves estimated from the data  
529 as hyperparameters (Drummond et al., 2006), and the geometric Brownian motion or  
530 autocorrelated-rates (AR) model, in which the logarithm of the substitution rate diffuses  
531 along the tree following Brownian motion. Consequently, in the AR model, the rate at the  
532 midpoint of a given branch is drawn from the distribution with variance proportional to  
533 the length of that branch, and with a mean equal to the rate at the parent branch (Ran-

534 nala and Yang, 2007). To estimate the marginal likelihoods, we used the stepping-stone  
535 sampling technique (Xie et al., 2011) as implemented in the R package `mcmc3r` (dos Reis  
536 et al., 2018). This method belongs to a broader class of path-sampling approaches, in  
537 which a number of unnormalized “power posterior” distributions of the form  $f_\beta = (\text{prior})$   
538  $\times (\text{likelihood})^\beta$  are constructed along a path between the prior ( $\beta = 0$ ) and the posterior  
539 ( $\beta = 1$ ). The product of the ratios of the estimated normalizing factors of the successive  
540 power posteriors then approximates the marginal likelihood (Xie et al., 2011).

541 Because sampling from the power posteriors requires the computationally inten-  
542 sive calculation of exact likelihoods, the stepping-stone method is not practical for large  
543 datasets containing hundreds of tips and multiple calibrations (dos Reis et al., 2018; Mc-  
544 Gowen et al., 2019). We therefore chose to perform model comparisons on two subsets of  
545 the full 336-species sample. First, we generated a subset of 19 species by drawing one rep-  
546 resentative from every family. For the non-monotypic families, we selected the species with  
547 the highest sequence coverage in the filtered 8-locus alignment. Since the signal of rate au-  
548 tocorrelation is expected to decay over long periods of time, it may be difficult to detect  
549 from sparse phylogenies of old clades (Drummond et al., 2006; Brown and van Tuinen,  
550 2011), running the risk that the 19-species tree may be biased toward the IR model. To  
551 alleviate this risk, we enlarged the first subset to 40 species, purposely using diversified  
552 sampling (Höhna et al., 2011) to break down long branches. Specifically, we identified the  
553 deepest split within each non-monotypic family, and drew a representative from that side  
554 of the split which was not yet represented in the 19-species subset. As before, if multiple  
555 species satisfied this condition, the highest-coverage one was selected. Finally, after sam-  
556 pling two species from each non-monotypic family following the aforementioned criteria,  
557 we kept adding the highest-coverage species not yet included in the subset regardless of  
558 their phylogenetic position, until a total of 40 species was reached.

559 We used 16  $\beta$  points to construct the sampling path for the analysis of the 19-  
560 species dataset, drawing 20,000 samples from each power posterior at the frequency of one  
561 sample per 20 generations. For the 40-species dataset, we used 64  $\beta$  points associated with  
562 shorter chains, such that each power posterior was represented by 6000 samples collected  
563 every 20 generations. Since only relative rather than absolute node ages were of interest at  
564 this stage of the analysis, we used a single narrow  $U[0.999, 1.001]$  calibration assigned to  
565 the root. The birth-death-sampling hyperparameters were fixed to `BDparas = 1 1 0.05`  
566 or `BDparas = 1 1 0.105` for the 19-species and 40-species datasets, respectively. In both  
567 cases, the sampling fraction corresponded to the proportion of the known extant charadri-  
568 iform diversity (380 species) represented in a given tree. The substitution model and its  
569 associated priors, as well as the relaxed clock hyperpriors, were identical to those used for  
570 the main analysis.

#### 571 **2.6.4 Main and sensitivity analyses**

572 The main analyses were performed using a single HKY85+ $\Gamma$  model applied to the entire  
573 8-locus alignment. We used 5 categories to discretize the  $\Gamma$  among-site rate distribution,  
574 assigning informative priors to its shape parameter  $\alpha$  and to the transition/transversion  
575 ratio  $\kappa$  (`ncatG = 5`, `kappa_gamma = 6 2`, `alpha_gamma = 2 14`). The birth and death  
576 rates were both fixed to 1 species per the time unit of 10 million years following Marshall’s

(2017) paleobiological “law” stating that the rates of speciation and extinction tend to be approximately equal, while the sampling fraction was set to the proportion of extant shorebird species included in the 336-species tree (`BDparas = 1 1 0.887`). For both the AR and IR models, we ran two MCMC analyses of 15,000 samples each, sampling every 250 generations. All analyses employed likelihood approximation based on the BASEML estimates of branch lengths (dos Reis and Yang, 2011). To diagnose convergence, we visually inspected the posterior traces from both runs in Tracer (Rambaut et al., 2018), determined the proportion of samples to be discarded as burnin (10%), and verified that after doing so, the ESS values exceeded 200 for all parameters in either run. We further used the ‘postProcParam’ utility from the ExaBayes suite (Aberer et al., 2014) to calculate the PSRF values between the two runs and the ESS values for both runs combined, ensuring that they were less than 1.01 and greater than 200 for all parameters, respectively. Finally, we concatenated the log files from both runs (excluding burnin) using LogCombiner v1.10 (Rambaut and Drummond, 2018), and summarized the combined MCMC sample in the form of posterior mean ages and 95% CIs. To assess the impact of prior interactions and the informativeness of the sequence data with regard to divergence times, we ran MCMC-Tree without data to sample from the joint prior. For both the AR and IR model, a single chain was used to draw 50,000 samples at the frequency of one sample per every 1000 generations.

Finally, to evaluate whether the results were influenced by the lack of partitioning across the relatively heterogeneous alignment, we performed additional analyses on a subset of the 8-locus dataset, which was divided into two partitions expected to exhibit less rate and process variation across sites. The “fast” partition comprised mitochondrial codon position 3, while the “slow” partition consisted of nuclear codon positions 1+2. An independent BASEML analysis was performed as described above to estimate the strict-clock rate for either partition, and the weighted average (by partition length) of the partition-specific rates was used to set up a gamma-Dirichlet hyperprior on the mean substitution rate, with another hyperprior of the same type assigned to the variance of its logarithm. These hyperpriors use a gamma distribution to specify the average value of both hyperparameters across partitions, and apportion their total value among partitions according to a Dirichlet distribution (dos Reis et al., 2014). We specified a flat distribution over all apportionment schemes by setting the concentration parameter to 1 (`rgene_gamma = 2 55.92 1, sigma2_gamma = 2 2 1`). As before, a HKY85 model with 5 rate categories was specified for either partition, but a more diffuse prior was assigned to  $\alpha$  to allow for smaller amounts of within-partition rate heterogeneity (`alpha_gamma = 1 1`). All other priors were identical to the main analyses. The partitioned analyses were again conducted under both the AR and IR clock models, with likelihood approximation, two chains of 18,000 samples per analysis, and a sampling period of 250 generations. Convergence was assessed using the same criteria as that of the main analyses.

## 2.7 Macroevolutionary rate estimation

To infer the diversification dynamics of the Charadriiformes, we used Bayesian Analysis of Macroevolutionary Mixtures (BAMM) v2.6, a model-averaging approach that employs a time-scaled phylogeny to detect clade-specific shifts between distinct macroevolution-

ary regimes (Rabosky, 2014; Mitchell et al., 2018). The method relies on reversible-jump MCMC (rjMCMC) to sample models with different numbers of parameters, which correspond to within-regime rates of speciation and extinction. The number of regimes and the locations of the shifts between them are inferred from the data, and the estimates of macroevolutionary rates through time are marginalized over the models involving different regime numbers and shift configurations. To assess the sensitivity of the inferred shift configurations and marginal rates to the modeling choices made upstream in the divergence time estimation step, we performed separate BAMM analyses on both the AR and IR time trees. After taxonomic reconciliation, 388 stratigraphically unique species-level fossil occurrences associated with the tips of both time trees were located in the Paleobiology Database (<http://www.paleobiodb.org>; last accessed April 22, 2021) to inform the estimated extinction and fossil preservation rates (Mitchell et al., 2018).

We used the R package BAMMtools (Rabosky et al., 2014) to set the priors on the initial rates and the hyperprior on the exponential rate change parameter. The expected number of shifts was set to 1, and within-regime speciation rates were allowed to vary through time. The global sampling fraction was set to 0.887 following the same rationale as in the node dating analyses. For each tree, we performed two rjMCMC runs consisting of 4 Metropolis-coupled chains (one cold and three incrementally heated) of 50 million generations, sampling every 10,000 generations. After examining the posterior traces, the first 10% of samples were discarded as burnin, and convergence was assessed by calculating the ESS ( $> 200$ ) and PSRF ( $< 1.01$ ) using the R package coda (Plummer et al., 2006). We used BAMMtools to process the output, compare the prior and posterior probabilities of different diversification models, and calculate their Bayes factors relative to the best-supported model. Additionally, we computed the 95% credible set of rate shift configurations, and extracted the single maximum *a posteriori* (MAP) configuration. Finally, we summarized marginal macroevolutionary rates through time, calculated the mean rates inside and outside the shifted clade to determine the magnitude of the shift (Upham et al., 2020), and obtained the 95% CIs about the root and tip speciation rates within each regime to evaluate the support for rate variation over time.

## 3 Results

### 3.1 Data assembly and alignment

The final supermatrix obtained by concatenating all 24 loci (Table 1) included 25,437 sites from a single outgroup and 305 species of charadriiforms (Table S1), accounting for  $\sim 81\%$  of the extant diversity (Dickinson and Remsen, 2013; Boyd, 2019; Clements et al., 2019). This concatenated alignment contained a total of 2,216,525 complete cells (excluding gaps and indeterminate residues), corresponding to 71.5% missing data. The number of genes per taxon (gene occupancy) ranged from 1 to all 24 in the outgroup and 22 in the highest-occupancy ingroup species (killdeer; *Charadrius vociferus*), with an average of 7.3 and a median of 5.5 (Supplementary Information, Fig. S2). Every ingroup species was represented by at least 275 (Olrog's gull, *Larus atlanticus*; lava gull, *Leucophaeus fuliginosus*) and up to 22,660 (*Charadrius vociferus*) nucleotides (average = 7244, median =

661 5900). The dataset included representatives of all 19 extant families, of which 6 monotypic  
662 (Chionidae, Dromadidae, Ibidorhynchidae, Pedionomidae, Pluvianellidae, Pluvianidae) and  
663 2 non-monotypic (Stercorariidae, Thinocoridae) families were sampled exhaustively. The  
664 partial decisiveness of our concatenated alignment was 0.87, meaning that the subtrees in-  
665 duced by the incomplete taxon coverage of the individual genes uniquely define 87% of all  
666 possible trees when combined. The inclusion of morphological data increased the number  
667 of sampled charadriiform species to 336 ( $\sim 89\%$  of the extant diversity), and the number of  
668 exhaustively sampled families to 9 by completing the sampling of the Jacanidae.

### 669 3.2 Gene tree and species tree analyses

670 The initial round of gene tree analyses described in section 2.2 resulted in the removal of  
671 11 species-level duplicates and 18 potentially mislabeled sequences whose phylogenetic po-  
672 sitions rendered well-supported families non-monophyletic. The final gene trees contained  
673 between 22 (BDNF) and 261 (CytB) tips (Table 1), with an average of 94 and a median of  
674 70 tips per gene tree. On average, more species were included in the trees based on mito-  
675 chondrial rather than nuclear loci (117 vs. 55 tips, respectively). Treating the entire mito-  
676 chondrial genome as a single locus, as in the ASTRAL analyses, yielded a tree of 300 tips.

677 The average local posterior probability (localPP) across the branches of the AS-  
678 TRAL species tree was 0.68. Almost 40.0% of branches were associated with localPP val-  
679 ues greater than 0.7, a threshold considered to represent an adequate balance between  
680 accuracy (proportion of branches above the threshold that are correct) and recall (pro-  
681 portion of correct branches that are above the threshold) by Sayyari and Mirarab (2016).  
682 Only 7.3% of branches exceeded a more stringent threshold of localPP  $> 0.95$ . On aver-  
683 age, the branches of the species tree were informed by 2.2 genes, with 55.8% of branches  
684 represented by at least 2 genes and 7.9% of branches informed by 5 or more genes. The ef-  
685 fective number of genes was highest for the deepest branches in the tree, especially those  
686 connecting suborder and “parvorder”-level taxa. Using Bayesian correlation testing as im-  
687 plemented in the R package bayestestR (Makowski et al., 2019), we found decisive evi-  
688 dence (*sensu* Kass and Raftery, 1995) for a positive correlation between the localPP of  
689 a branch and its effective number of genes ( $\rho = 0.49$ , Bayes factor in favor of a nonzero  
690  $\rho = 1.72 \times 10^{17}$ ).

691 The ASTRAL tree supported the monophyly of the three charadriiform suborders  
692 (localPP: Charadrii = 0.60, Scolopaci = 0.87, Lari = 0.78), as well as the sister-group re-  
693 lationship of Scolopaci and Lari to the exclusion of Charadrii (localPP = 1). This was re-  
694 flected in the generally high support for the corresponding nodes across the 10 gene trees  
695 (Figure 3). At the subordinal level, notable discordance between the species tree and gene  
696 trees was limited to the monophyly of Charadrii, which was strongly rejected by one locus  
697 (FGB7) and weakly rejected by 5 others (ADNH, BDNF, MB2, NTF3, RAG1). Relation-  
698 ships within suborders were mostly also in agreement with recent molecular phylogenies,  
699 and all of the “superfamily” or “parvorder”-level clades of Cracraft (2013) were strongly  
700 supported by 2–7 gene trees with little to no contradicting signal (Figure 3). The sister-  
701 group relationship between Haematopodidae and Recurvirostridae to the exclusion of the  
702 ibisbill (*Ibidorhyncha*) received a low support value (localPP = 0.42, equal to the support  
703 for the next best arrangement) but was only weakly contradicted by a single gene (RAG1),



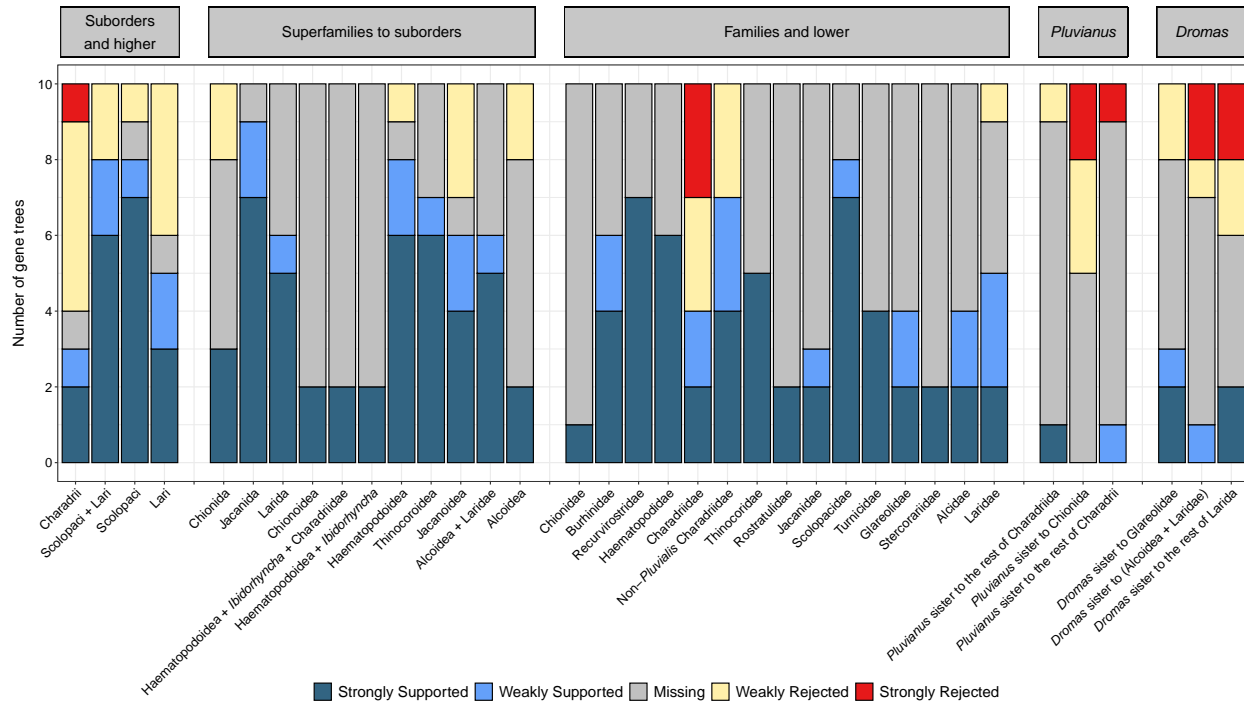

704 which supported a sister-group relationship between *Ibidorhyncha* and Haematopodidae  
 705 instead. In contrast, the position of *Pluvialis* within Charadriidae (localPP = 0.51) was as-  
 706 sociated with substantial inter-gene conflict (Figure 3), with strong support from two loci  
 707 (ALDOB, mitogenome) and strong opposition from three others, which either allied *Pluvi-*  
 708 *alis* with Haematopodoidea (ADNH) or with a clade comprising Haematopodoidea and all  
 709 other charadriids (GAPDH, MB2).

710 Two family-level relationships were subject to conflict between the ASTRAL tree  
 711 on the one hand and concatenation-based results, as well as previous molecular phyloge-  
 712 nies, on the other. These concerned the position of the monotypic families comprising the  
 713 Egyptian plover (Pluvianidae) and the crab plover (Dromadidae) (Figure 4). The former  
 714 taxon formed the sister group to the rest of Charadrii (localPP = 0.05), while the lat-  
 715 ter emerged sister to an (Alcoidea + Laridae) clade (localPP = 0.25), thus violating the  
 716 monophyly of Charadriida and Glareoloidea *sensu* Cracraft (2013), respectively. Notably,  
 717 despite the inclusion of these relationships in the final ASTRAL tree, both branches had  
 718 better-supported alternative resolutions that agreed with the concatenation-based topology  
 719 and previous analyses in placing *Pluvianus* as the earliest-diverging member of a mono-  
 720 phyletic Charadriida (localPP = 0.92), and *Dromas* as the sister group of the pratincoles  
 721 and coursers (Glareolidae) (localPP = 0.67). This result is also borne out by a detailed  
 722 examination of the gene tree support for the alternative topologies (Figure 3). The conven-  
 723 tional position of *Pluvianus* within Charadriida was strongly supported by a single gene  
 724 (RAG1; bootstrap = 83%) and weakly opposed by one other locus (mitogenome; bootstrap  
 725 = 56%) which favored the alternative quadripartition included in the species tree, whereas  
 726 the inclusion of *Dromas* within Glareoloidea received support from three loci (FGB7: 90%,  
 727 MB2: 78%, RAG1: 56%) while being contradicted by two others that instead weakly sup-



ported a relationship to the auk and gull clade (BDNF: 34%, mitogenome: 43%). However, the failure to include the better-supported alternative positions in the species tree was not due to an inadequate exploration of the search space, as constrained searches performed on topologies enforcing alternative resolutions for the two quadripartitions in question all yielded quartet scores 0.013–0.065% lower than that of the original tree. Enforcement of the conventional position incurred a greater quartet score reduction for *Dromas* (0.043%, averaged over the three possible resolutions for the branch attaching to *Pluvianus*) than for *Pluvianus* (0.036%, averaged over the three possible resolutions for the branch attaching to *Dromas*).

### 3.3 Concatenated analyses

The average internode certainty (IC) value across the branches of the RAxML tree was 0.59; of the 304 internal branches present in the unrooted tree, 10.5% had negative IC values (indicating that a conflicting bipartition had greater prevalence in the bootstrap set than the bipartition present in the maximum likelihood tree), and 88.8% had strictly positive internode certainties (indicating that the bipartition in the RAxML tree occurred in the bootstrap set more frequently than any conflicting bipartition). Nearly all the branches associated with negative IC values represented internal relationships within species-rich genera such as *Calidris*, *Larus*, *Ochthodromus*, and *Vanellus*. The average bootstrap support (BS) across the RAxML tree was 79%, with 69.6% of branches exceeding the threshold of BS = 70%. In contrast, the IC value exceeded by the same percentage of branches only amounted to 0.26. On average, the branches of the RAxML tree were informed by 5.9 genes. It should be noted that this value is not directly comparable to that given for the ASTRAL tree, as mitochondrial loci were considered separately when quantifying the locus coverage across the concatenation-based trees. Over 87% of branches were informed by 2 or more loci, with 52% of branches represented by at least 5 loci. We found decisive evidence that the locus coverage of a branch was positively correlated with both its internode uncertainty ( $\rho = 0.24$ , Bayes factor = 801.3) and its bootstrap support ( $\rho = 0.21$ , BF = 128.8).

The average posterior probability on the ExaBayes tree was 0.86, with 65% of nodes exceeding the threshold of PP = 0.95. The average locus coverage of a branch in the ExaBayes tree was 5.8 genes, with 86% of branches informed by at least 2 loci and 51% of branches represented by 5 or more loci. Bayesian correlation analysis found decisive evidence for a relationship between the posterior probability of a branch and its locus coverage ( $\rho = 0.28$ , BF =  $4.03 \times 10^4$ ). The average posterior probability of the 50 bipartitions present in the ExaBayes tree but not the RAxML tree was 0.46, while the average bootstrap and internode certainty of the conflicting branches from the RAxML tree amounted to 40% and 0.03, respectively.

The RAxML and ExaBayes analyses of the concatenated alignment agreed on all family-level interrelationships, which were also consistent with previous molecular results and – except for the positions of *Pluvianus* and *Dromas* – with the topology of the species tree (Figure 4). The monophyly of Haematopodoidea to the exclusion of *Ibidorhyncha* received strong support from both approaches (BS = 88%, PP = 1), while the monophyly of the plovers was considerably less robust (BS = 47%, PP = 0.71). Both analyses found

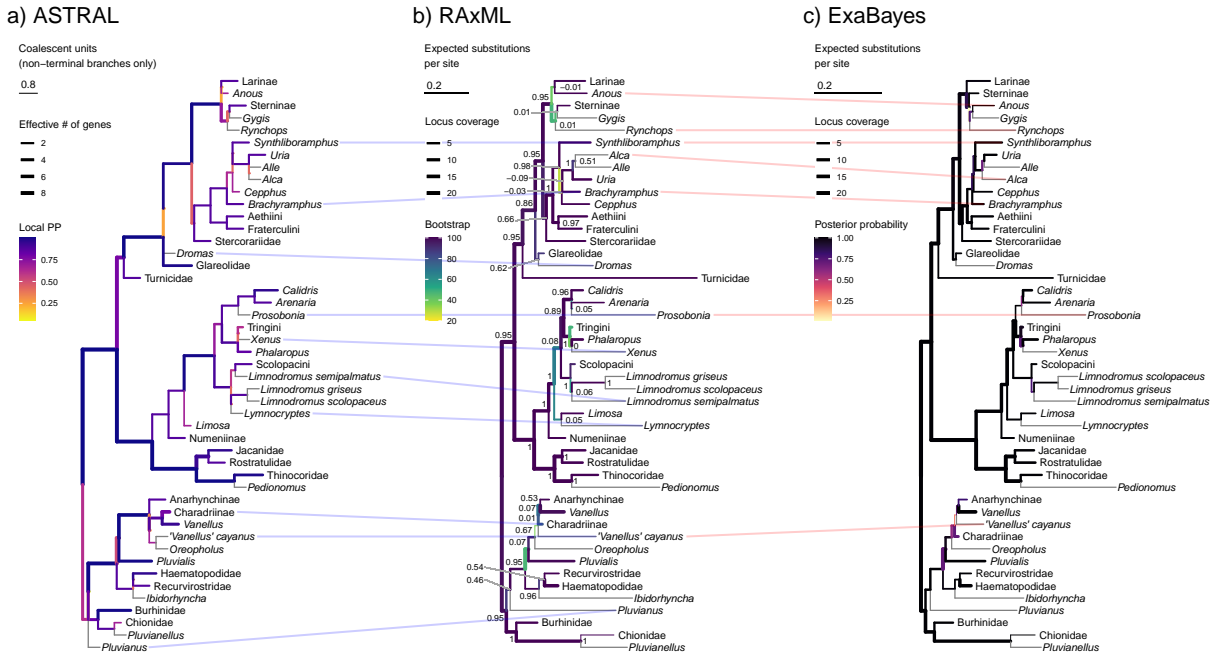

771 strong support for the sister-group relationships between *Dromas* and Glareolidae (BS =  
 772 89%, PP = 1) and between *Pluvianus* and the rest of Charadriidae (BS = 87%, PP = 1),  
 773 in contrast to the ASTRAL tree. Major areas of disagreement between the RAXML and  
 774 ExaBayes topologies included the intrafamilial relationships within the Laridae and the  
 775 Alcidae. In the former case, both approaches found the gulls (Larinae) outside of a clade  
 776 including the true terns (Sterninae), white terns (*Gygis*), and the skimmers (*Rynchops*),  
 777 but disagreed on the position of the noddies (*Anous*), which were allied with the gulls in  
 778 the RAXML phylogram (BS = 40%) but with *Gygis* in the ExaBayes consensus tree (PP  
 779 = 0.77). Similarly, among the auks, the interrelationships of *Brachyramphus*, *Synthlibo-*  
 780 *ramphus*, the true guillemots (*Cepphus*), and the true auks and murrelets (*Alca*, *Alle*, *Uria*)  
 781 differed between the two methods, but with poor support values (BS < 50%, PP < 0.9) in  
 782 both cases.

783 Topological inconsistencies between the concatenated analyses and the ASTRAL  
 784 estimate were similarly limited to branches that were poorly supported in all three trees  
 785 (Figure 4). In contrast to previous studies (Baker et al., 2007; Burleigh et al., 2015), both  
 786 concatenation-based trees found the jacksnipe (*Lymnocyrtus*) within Limosinae rather  
 787 than Scolopacinae (BS = 63%, PP = 1). The species tree weakly upheld a scolopacine  
 788 affinity for the jacksnipe (localPP = 0.42) but rendered the dowitchers (*Limnodromus*) pa-  
 789 raphyletic with respect to the rest of the subfamily (localPP = 0.58; Figure 4). Within the  
 790 Charadriidae, RAXML and ExaBayes both found the tawny-throated dotterel (*Oreopholus*)  
 791 to represent the second earliest divergence after *Pluvialis* (BS = 36%, PP = 0.60), consis-  
 792 tent with several earlier analyses (Baker et al., 2012; Burleigh et al., 2015). In the species  
 793 tree, this position was instead occupied by a moderately well-supported clade (localPP  
 794 = 0.67) uniting *Oreopholus* with the pied lapwing ("*Vanellus*" *cayanus*), whose lack of a

795 close relationship to other lapwings (*Vanellus*) was also borne out by the concatenated  
796 analyses (Figure 4). Aside from this limited conflict, the species-tree and concatenation-  
797 based approaches yielded highly similar topologies, as evidenced by the fact that the  
798 RAxML–ExaBayes (0.165), RAxML–ASTRAL (0.165), and ExaBayes–ASTRAL (0.221)  
799 RF distances were all significantly smaller than the average distance between any of the  
800 three trees and 1000 sequence-only topologies from the Jetz et al. (2012) pseudoposterior  
801 (RAxML: 0.304, 95% CI: 0.273–0.333; ExaBayes: 0.328, 95% CI: 0.300–0.356; ASTRAL:  
802 0.313, 95% CI: 0.285–0.341). To a lesser extent, this was also true for their distances from  
803 the supermatrix-based tree of Burleigh et al. (2015) (RAxML = 0.267, ExaBayes = 0.286,  
804 ASTRAL = 0.267).

### 805 3.4 Combined analyses

806 The fully resolved tree generated by the evolutionary placement algorithm (EPA) differed  
807 from the total-evidence (TE) tree in the positions of 21 out of the 31 species without se-  
808 quence data (Supplementary Information, Fig. S9). Neither tree perfectly matched the  
809 preexisting taxonomy of the clade. Both analyses found the beach stone-curlew (*Burhi-*  
810 *nus magnirostris*), often placed in the separate genus *Esacus* (Boyd, 2019; Clements et al.,  
811 2019), to be deeply nested among other *Burhinus* species. The EPA tree rendered the lap-  
812 wings (*Vanellus*) polyphyletic by allying the Senegal lapwing (*V. lugubris*) with *Oreopho-*  
813 *lus*, while the TE analysis weakly favored the polyphyly of the jacana genus *Actophilornis*  
814 by inferring a sister-group relationship between *A. albinucha* and *Microparra* (Figure 5).  
815 However, the relationships within the Jacanidae were essentially ambiguous in the TE  
816 tree, and none of the nodes separating the two species of *Actophilornis* received a boot-  
817 strap support value greater than 50%. The same was true of most of the nodes present in  
818 the TE tree but not the EPA tree (average BS = 38.4%), and indeed of most of the nodes  
819 connecting the morphology-only species to the rest of the tree (average BS = 46.2%). In  
820 terms of RF distances, the TE and EPA topologies were substantially closer to each other  
821 (RF distance = 0.201) than to a sample of 1000 all-taxa trees from the Jetz et al. (2012)  
822 pseudoposterior (TE: 0.520, 95% CI: 0.488–0.550; EPA: 0.510, 95% CI: 0.478–0.541). De-  
823 spite this high degree of congruence between both analyses, the TE tree was found to fit  
824 the combined data significantly better than the EPA tree (Table 3).

| Tree | IQ-TREE log likelihood | <i>p</i> (KH) | <i>p</i> (SH) | <i>p</i> (AU) | <i>c</i> (ELW) |
|------|------------------------|---------------|---------------|---------------|----------------|
| TE   | -412147.336            | 0.979 +       | 1 +           | 0.985 +       | 0.978 +        |
| EPA  | -412224.722            | 0.0213 -      | 0.0213 -      | 0.0154 -      | 0.0219 -       |

Table 3: Likelihood support for the total-evidence (TE) and evolutionary placement algorithm (EPA) trees calculated on the combined dataset using IQ-TREE. Significance levels (*p*) and the inclusion in (+) or significant exclusion from (–) the 95% confidence set are given for the Kishino-Hasegawa (KH; Kishino and Hasegawa, 1989), Shimodaira-Hasegawa (SH; Shimodaira and Hasegawa, 1999), and approximately unbiased (AU; Shimodaira, 2002) tests; *c* (ELW) denotes confidence as measured using expected likelihood weight (Strimmer and Rambaut, 2002).

825 The inclusion of morphological data in the TE analysis also changed the backbone  
826 relationships among the species represented by sequence data. When pruned down to  
827 the taxon sample of the concatenated tree, the TE tree differed from the former in 43  
828 nodes (RF distance = 0.142); however, these were generally poorly supported in both  
829 the concatenated RAxML tree (average BS = 38.2%, average IC = 0.025) and in the TE  
830 tree (average BS = 34.6%). Out of the 43 nodes present in the concatenated RAxML  
831 tree but not in the TE tree, 33 were also absent from the concatenated ExaBayes tree.  
832 The TE tree and the concatenated trees agreed on all essential features of higher-level  
833 charadriiform phylogeny, including the sister-group relationship between *Ibidorhyncha* and  
834 Haematopodoidea and the monophyly of Charadriidae (Figure 5), and topological conflict  
835 was largely restricted to intrageneric relationships within species-rich genera such as *Glare-*  
836 *ola*, *Larus*, or *Ochthodromus*. Notable deviations from the concatenation-based topologies  
837 included the monophyly of the lapwings (*Vanellus*), with *V. cayanus* sister to the rest of  
838 the clade, but the support for this result was extremely weak (BS = 9%).

### 839 3.5 Fossil calibrations

840 The Bayesian re-analyses of the morphological matrix of Musser and Clarke (2020) ro-  
841 bustly supported a charadriiform affinity for specimen IGM 100/1435 from the Pale-  
842 ocene/Eocene boundary of Mongolia, which predates the previous oldest known remains  
843 of the clade (Figure 1). Under all three topological constraints, IGM 100/1435 emerged as  
844 a crown-group charadriiform and specifically as a total-group member of the Chionoidea  
845 (average PP = 0.909; Supplementary Information, Fig. S10), a position also supported  
846 by some of the original, partially constrained parsimony analyses (Musser and Clarke,  
847 2020). For the purposes of calibration design, we took the conservative approach of asso-  
848 ciating the specimen with the least inclusive clade to which it could be assigned with a  
849  $PP \geq 0.95$ , a condition satisfied only by the entire charadriiform crown group (Table 2).  
850 When constructing the outgroup sequences, which require taxa to be associated with  
851 branches rather than nodes, the fossil was treated as *incertae sedis* within the total group  
852 of Charadrii. The analyses also weakly (average PP = 0.504) but consistently placed SMF  
853 Av 619, another early Eocene shorebird record (Figure 1), within the total group of Lar-  
854 ida. However, the least inclusive node to which the specimen could be assigned with a PP  
855  $\geq 0.95$  was again the charadriiform crown group, rendering it redundant as a potential cal-  
856 ibration. To account for phylogenetic uncertainty, we averaged the posterior probabilities  
857 of the membership of IGM 100/1435 within the shorebird crown across all three analyses,  
858 and used the complement ( $1 - \text{average PP} = 0.024$ ) as the left-tail probability for the  
859 corresponding calibration density (i.e., the probability that the true age of the clade is  
860 younger than the soft minimum defined by IGM 100/1435).

### 861 3.6 Divergence time estimation

862 Under the IR model, the 2-partition analysis failed to reach the target ESS ( $> 200$ ) and  
863 PSRF ( $< 1.01$ ) for the ages of two of the calibrated nodes (calibrations 1 and 4; nodes 221  
864 and 226 in Figure 5). We therefore refer primarily to the unpartitioned results, although  
865 the estimates were broadly similar between the two analyses. Figure 5 shows the posterior

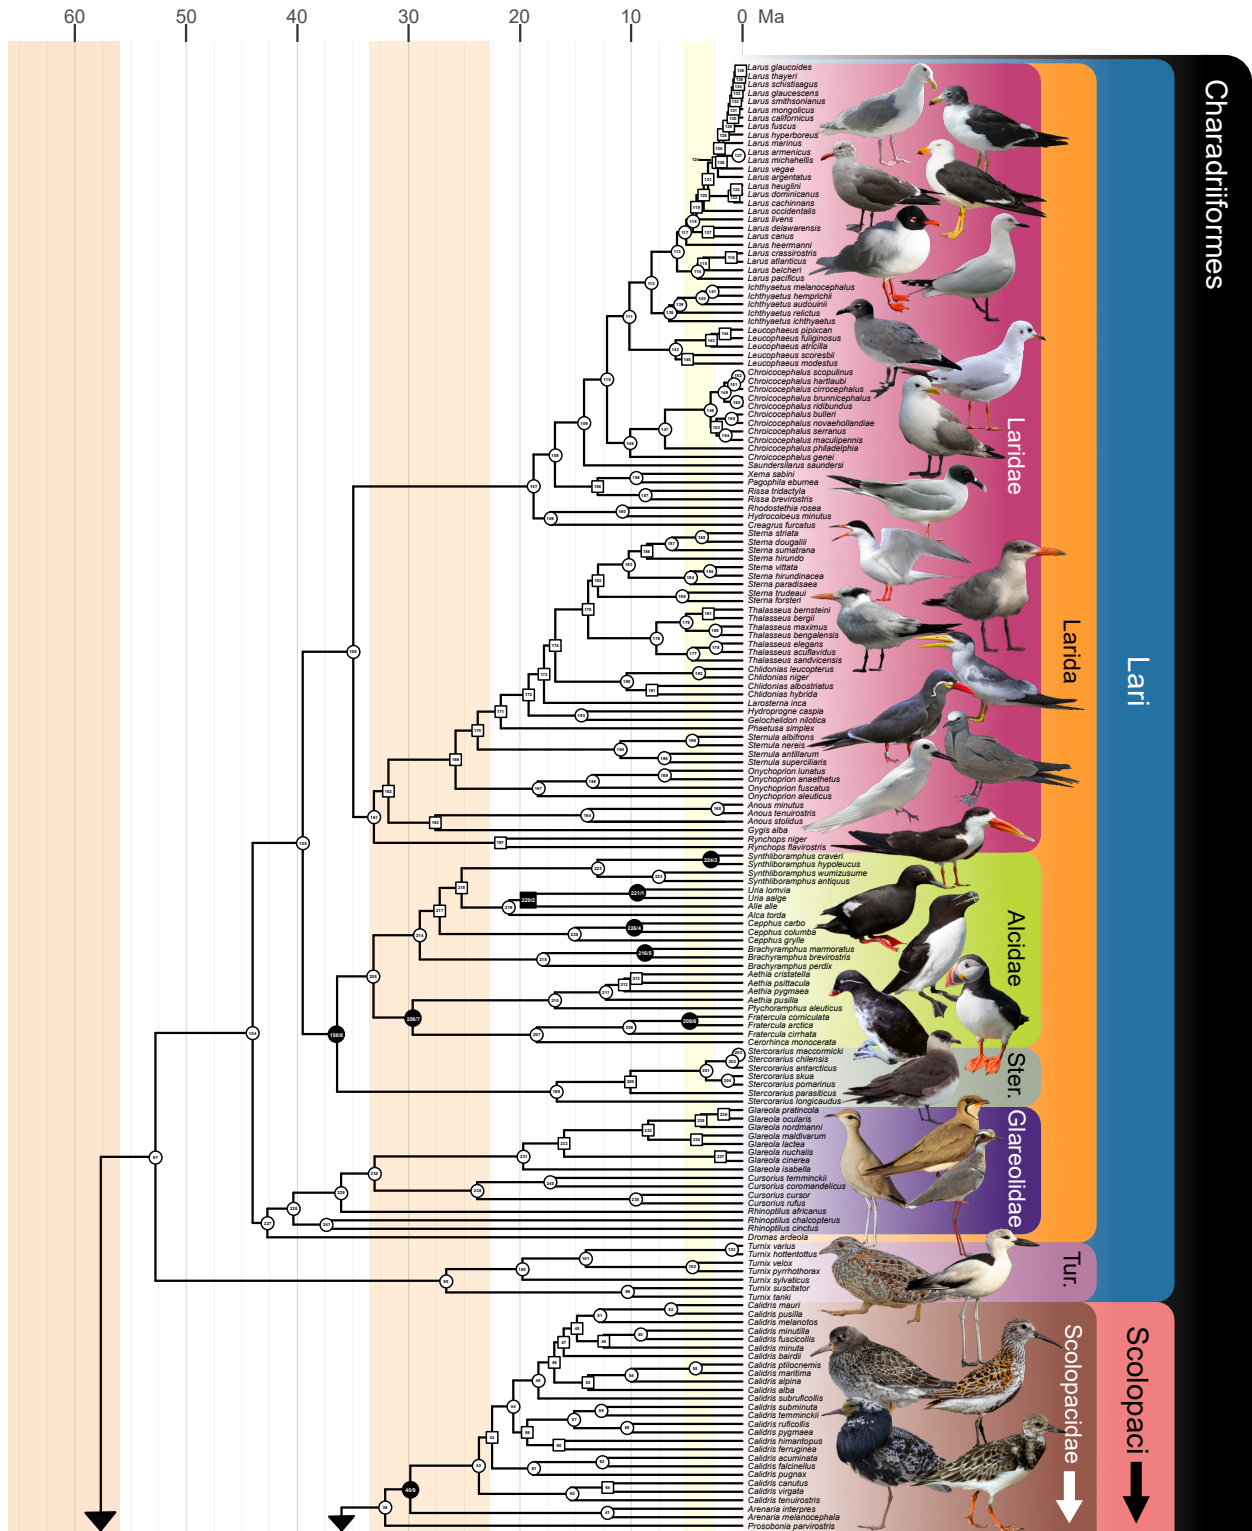







866 mean node ages obtained from the unpartitioned analysis under the IR model, supporting  
 867 a mid-Paleocene origin for the charadriiform crown group at 59.3 Ma (95% posterior CI  
 868 = 55.4–64.8 Ma). This result was robust to the choice of the relaxed clock model (auto-  
 869 correlated rates: mean = 58.1 Ma, 95% posterior CI = 55.0–63.0 Ma) and the partitioning  
 870 scheme (2-partition analysis, AR: mean = 58.3 Ma, 95% posterior CI = 55.1–63.6 Ma; IR:  
 871 mean = 60.9 Ma, 95% posterior CI = 55.9–66.0 Ma), with all analyses yielding relatively  
 872 narrow credibility intervals that did not extend into the Cretaceous. Almost half of the  
 873 families (IR: 8 out of 19; AR: 9 out of 19) had Eocene mean stem ages, indicating an early  
 874 period of steady diversification. The estimated timeline suggests that the current diversity  
 875 of the three most species-rich families (Laridae: 105 species in the TiF checklist, Scolopaci-  
 876 dae: 97 species, Charadriidae: 67 species) has been accumulated over long periods of time,  
 877 as the posterior distributions of their crown ages were concentrated in the Eocene (Lari-  
 878 dae, IR: 30.2–39.8 Ma; Scolopacidae, IR: 37.4–48.6 Ma; Charadriidae, IR: 31.5–43.3 Ma),  
 879 substantially predating those of the other families with the exception of Glareolidae.

| Dataset    | Model     | Log marginal $L \pm SE$                 | Bayes factor | PP           |
|------------|-----------|-----------------------------------------|--------------|--------------|
| 19 species | <b>AR</b> | <b><math>-43224.05 \pm 0.094</math></b> | —            | <b>0.986</b> |
|            | IR        | $-43228.34 \pm 0.097$                   | 0.0138       | 0.014        |
| 40 species | AR        | $-63958.95 \pm 0.125$                   | 0.1498       | 0.130        |
|            | <b>IR</b> | <b><math>-63957.05 \pm 0.084</math></b> | —            | <b>0.870</b> |

Table 4: Bayes factor comparison of the relaxed clock models. AR = autocorrelated rates; IR = independent rates; Log marginal  $L \pm SE$  = logarithm of the marginal likelihood with standard error; PP = model posterior probability assuming a flat prior over models. For each dataset, the model with the highest marginal likelihood is shown in bold; note that the Bayes factors are given relative to the preferred model.

880 The Bayesian clock model selection yielded ambiguous results (Table 5), favoring  
 881 the AR model over the IR model in the 19-species dataset (PP = 0.986, BF = 72.6, strong  
 882 evidence *sensu* Kass and Raftery, 1995) but flipping in favor of the IR model in the 40-  
 883 species dataset (PP = 0.870, BF = 6.7, positive evidence). Clock model choice had little  
 884 impact on the ages of the deepest nodes, but resulted in considerable differences between  
 885 the date estimates for some of the more recent divergences (Figure 6). On average, the IR  
 886 posterior mean ages were 1.80 Myr younger compared to the AR estimates, although the  
 887 greatest difference between the two models occurred at a node that was much older un-  
 888 der independent rates (node 241 in Figure 5: IR mean = 37.4 Ma, AR mean = 20.8 Ma).  
 889 Notably, all of the 37 nodes whose posterior CIs did not overlap between the two clock  
 890 models were younger under the IR model (Figure 6); these nodes were all concentrated  
 891 within the gull subfamily (Larinae). The difference was even more pronounced in the parti-  
 892 tioned analysis (IR means on average younger by 5.52 Myr; 62 nodes with non-overlapping  
 893 posterior CIs all younger under the IR model). The 95% posterior CIs tended to be nar-  
 894 rower under the IR model (average width = 8.67 Myr) than under the AR model (average  
 895 width = 9.88 Myr). Compared to the IR model, outliers with particularly diffuse posterior  
 896 age distributions were more prominent but mostly associated with the same nodes when

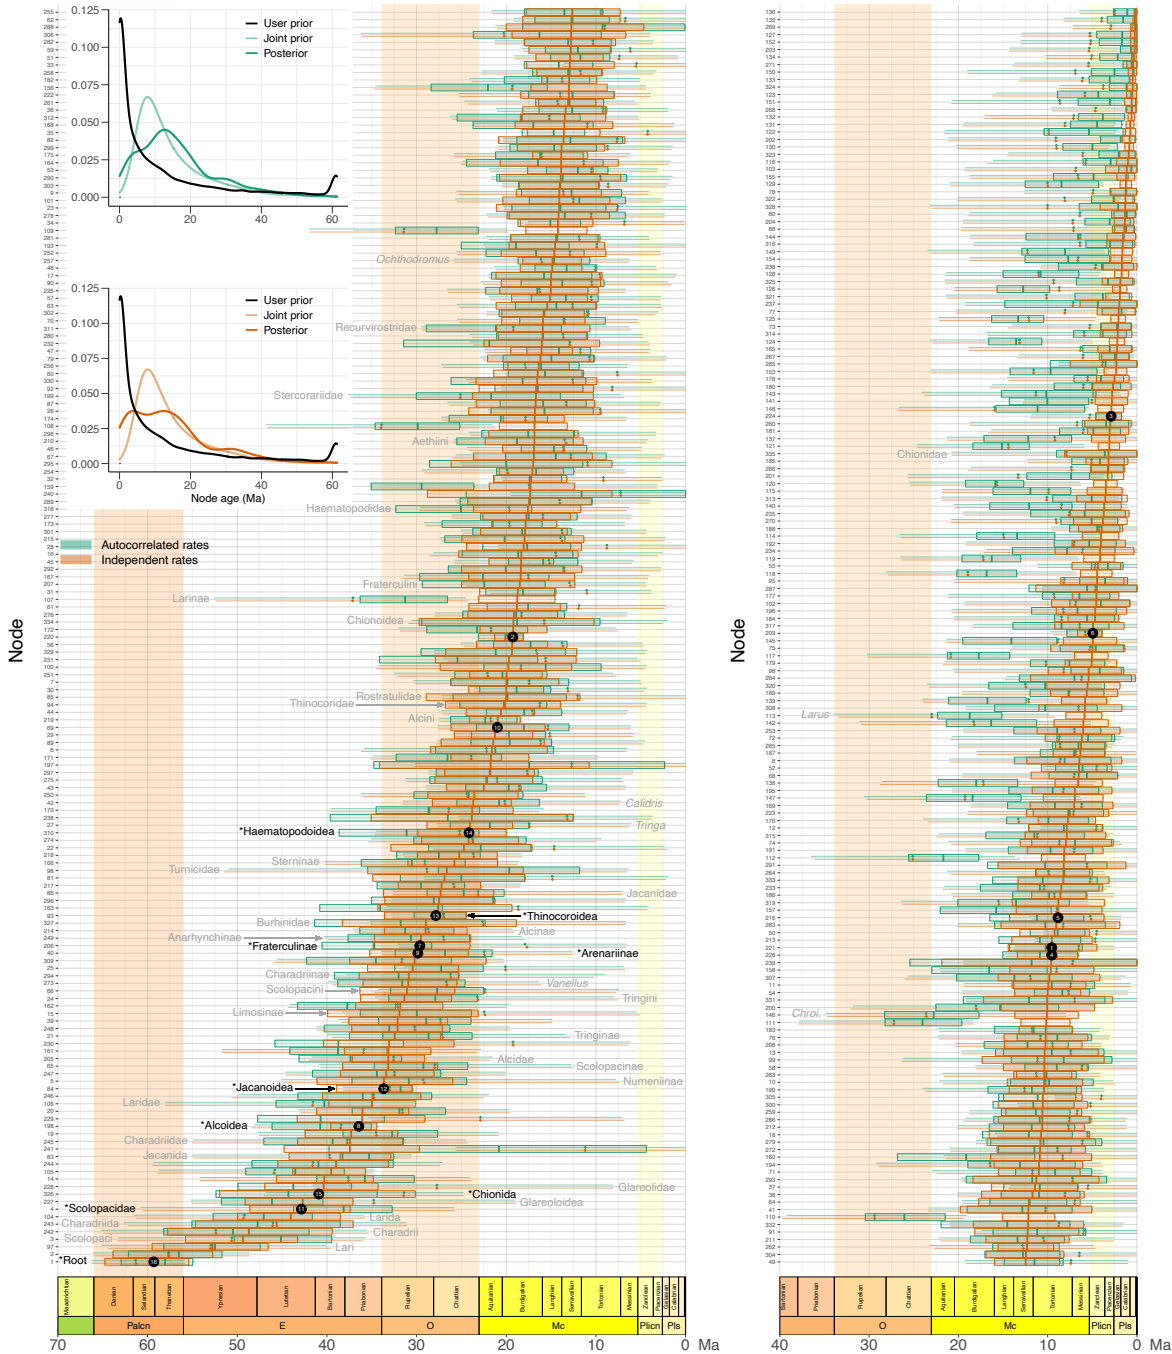

897 the AR model was employed; the three widest 95% posterior CIs (range of widths: 27.1–  
 898 35.4 Myr) were found at nodes 197, 238, and 241 under autocorrelated rates (Figure 6),  
 899 and at nodes 197, 238, and 239 under independent rates (range of widths: 21.9–23.4 Myr).  
 900 Bayesian simple linear regression of the 95% posterior CI onto the posterior mean (with  
 901 a suppressed intercept and an improper uniform prior on the slope) yielded lines with a  
 902 slope of 0.458 for the IR model and 0.471 for the AR model (Supplementary Information,  
 903 Fig. S11), indicating the amount by which the 95% posterior CI widens for every 1 Ma  
 904 added to the mean age (dos Reis et al., 2018). In the 2-partition analysis, the 95% pos-

905 terior CIs were wider under the AR model (average width = 12.69 Myr) but not the IR  
906 model (average width = 8.34 Myr; note that this value is not sensitive to the exclusion of  
907 the two nodes whose ages failed to converge). However, the regression lines were steeper  
908 for both models (Supplementary Information, Fig. S11), suggesting that the inclusion of  
909 a greater amount of sequence data in the unpartitioned analyses helped reduce the uncer-  
910 tainty associated with the divergence time estimates.

| Dataset    | Model     | Log marginal $L \pm SE$                 | Bayes factor | PP           |
|------------|-----------|-----------------------------------------|--------------|--------------|
| 19 species | <b>AR</b> | <b>-43224.05 <math>\pm</math> 0.094</b> | —            | <b>0.986</b> |
|            | IR        | -43228.34 $\pm$ 0.097                   | 0.0138       | 0.014        |
| 40 species | AR        | -63958.95 $\pm$ 0.125                   | 0.1498       | 0.130        |
|            | <b>IR</b> | <b>-63957.05 <math>\pm</math> 0.084</b> | —            | <b>0.870</b> |

Table 5: Bayes factor comparison of the relaxed clock models. AR = autocorrelated rates; IR = independent rates; Log marginal  $L \pm SE$  = logarithm of the marginal likelihood with standard error; PP = model posterior probability assuming a flat prior over models. For each dataset, the model with the highest marginal likelihood is shown in bold; note that the Bayes factors are given relative to the preferred model.

911 Although MCMCTree employs conditional rather than multiplicative calibration  
912 construction, thus ensuring compatibility between the user-specified calibration densi-  
913 ties and the birth-death prior (Yang and Rannala, 2005; Heled and Drummond, 2011),  
914 the joint (effective) prior density on the age of a node can still deviate from the specified  
915 calibration density because of the requirement that ancestral nodes be older than their  
916 descendants (dos Reis et al., 2018; Su et al., 2021). We observed this effect for several cal-  
917 ibration densities assigned to nested nodes (Figure 7). In particular, the joint prior on the  
918 age of the sandpipers (Scolopacidae) appears to have been pushed into the past by the cal-  
919 ibration densities assigned to two of its subclades (Arenariinae and *Gallinago* + *Coeno-*  
920 *corypha*), with its 95% prior CI ranging from 25.8–60.6 Ma, as opposed to 20.0–48.3 Ma  
921 for the user-specified density (Table 2). However, the fact that the joint priors of the two  
922 subclades were bimodal suggests that the effect may have been bidirectional, with the  
923 ancestral node pulling the ages of the nested nodes deeper into the past (Figure 7). The  
924 same phenomenon also affected another pair of nested calibrations within Fraterculinae  
925 (6 and 7) but did not impact calibrations 8 (assigned to a clade comprising calibrations 1  
926 through 7) and 2 (assigned to the node immediately above calibration 1), possibly due to  
927 the fact that their user-specified densities were much older than those of any of the cali-  
928 brated nodes descended from them (Table 2). Similar patterns of calibration interactions  
929 were also observed under the AR model (Supplementary Information, Fig. S12).

930 Consistent with other recent studies (Chazot et al., 2019; Su et al., 2021), we found  
931 that the sequence data were able to inform the estimated dates, as indicated by the diver-  
932 gence of node age posteriors from the corresponding joint priors (Figure 7). This distinc-  
933 tion was particularly notable for the root age (calibration 16). Although the joint prior  
934 placed probabilities of 0.055 (IR) or 0.057 (AR) on ages predating the K–Pg boundary  
935 (66.0 Ma), approximating the user-specified 5% fraction, the posterior probability of a  
936 pre-K–Pg origin of shorebirds only amounted to 0.0095 or 0.0035 under the IR and AR

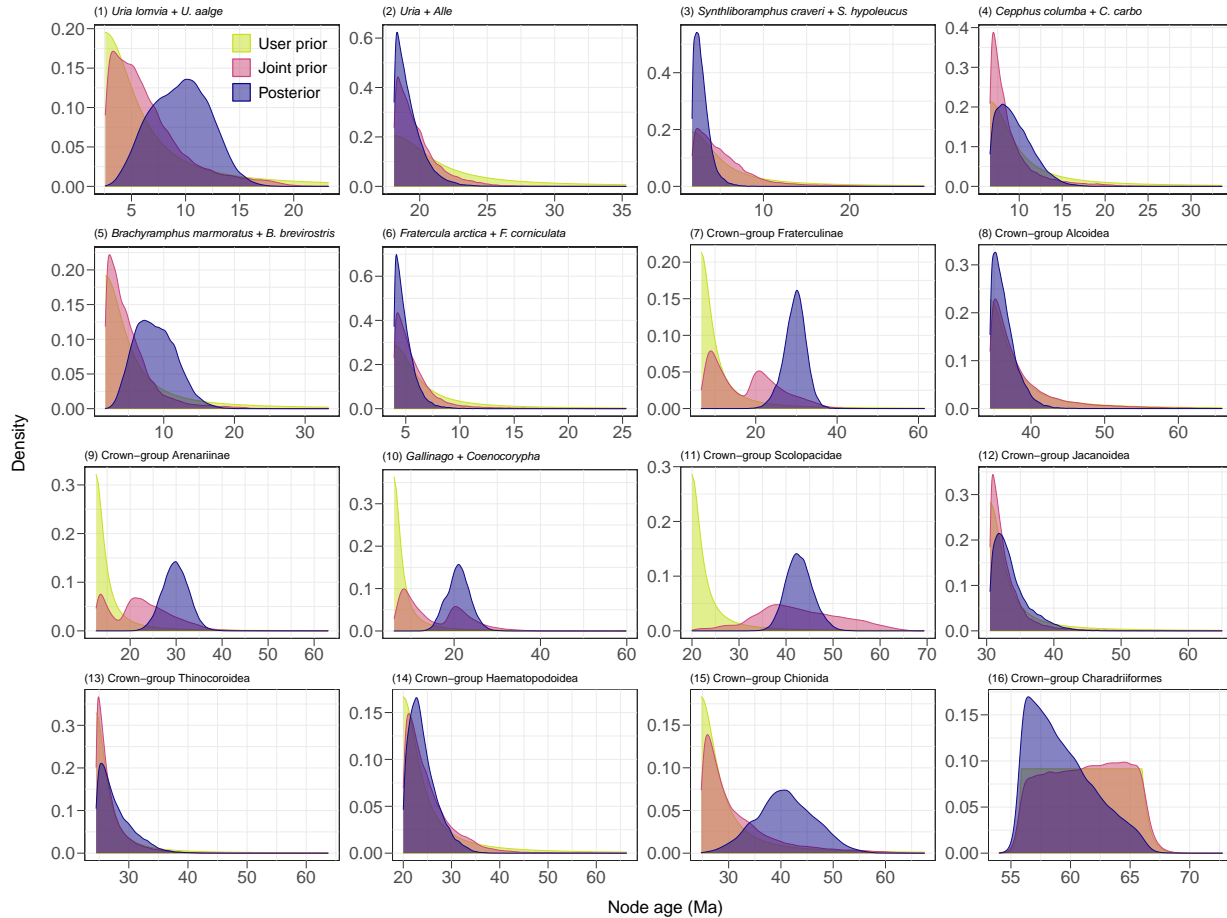

937 models, respectively. Conversely, the probability of a post-Paleocene origin more than dou-  
 938 bled from 0.021 (IR) or 0.020 (AR) under the joint prior (user-specified prior probabili-  
 939 ty: 0.024) to 0.044 and 0.099 under the IR and AR posteriors, with the mean and median  
 940 shifting toward the present by 2.0 and 2.6 Myr (IR) or 3.3 and 4.0 Myr (AR), respectively.  
 941 In agreement with recent findings (Brown and Smith, 2018), we found greater differences  
 942 between the induced prior and the posterior for uncalibrated nodes than for calibrated  
 943 nodes, indicating that the ability of the data to override the prior was real but limited.  
 944 Relative prior-posterior displacement, defined here as  $|a_{po} - a_{pr}| / [(a_{po} + a_{pr}) / 2]$  (where  $a_{pr}$   
 945 is the prior mean and  $a_{po}$  is the posterior mean), was greater for the uncalibrated nodes  
 946 (IR: 0.530, AR: 0.356) than for the calibrated ones (IR: 0.206, AR: 0.237). Similarly, the  
 947 average shrinkage of the 95% posterior CIs relative to the 95% prior CIs was less promi-  
 948 nent for the nodes with calibrations (IR: 37.8%, AR: 37.1%) than for those without them  
 949 (IR: 57.9%, AR: 51.8%) (Figure 6).

### 950 3.7 Macroevolutionary rate estimation

951 Using the time tree inferred under the AR model, we found no evidence for clade-specific  
 952 diversification regimes that significantly differed from that of the order as a whole (Fig-

953 ure 8a). The 95% credibility set contained a single configuration without rate shifts, and  
 954 the model consisting of a single macroevolutionary regime was favored over multi-regime  
 955 alternatives (PP = 0.86, BF = 3.74 relative to the next best model with one shift). Within  
 956 this regime, we found strong support for a treewide diversification slowdown, with non-  
 957 overlapping 95% CIs about the mean net diversification rates at the root (0.144–0.303  
 958 sp·Myr<sup>-1</sup>, i.e., species per million years) and at the tips (0.037–0.053 sp·Myr<sup>-1</sup>).

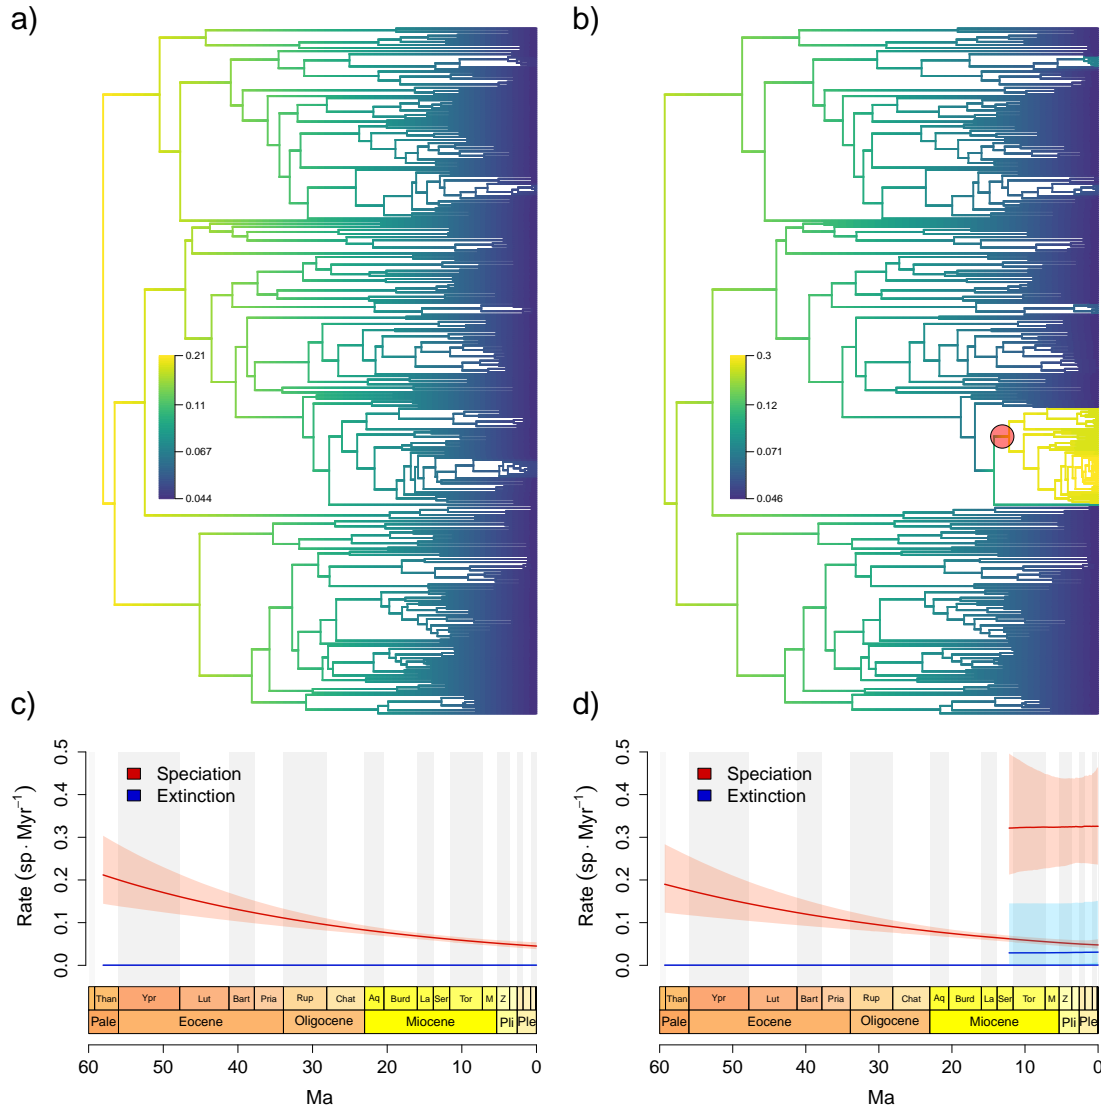

959 In contrast, when estimating diversification dynamics from the tree based on the  
 960 IR relaxed clock, the best supported model included a rate shift associated with the clade  
 961 comprising the gull genera *Larus*, *Ichthyaetus*, *Leucophaeus*, and *Chroicocephalus* (node  
 962 110 in Figure 5). The shift subtending this node, or a shift subtending the node immedi-  
 963 ately above it (node 109), consistently appeared in all the 22 configurations included in  
 964 the 95% credibility set, and represented the only shift present in the MAP configuration  
 965 (PP = 0.67; Figure 8b). The model-averaged time-weighted mean rate of the (*Larus* +  
 966 *Chroicocephalus* clade exceeded that of the background regime by a factor of 5.0 for spe-



967 ciation and 4.5 for net diversification. The elevated net diversification rates estimated for  
968 the gull clade were nearly constant through time (root 95% CI: 0.168–0.445 sp·Myr<sup>-1</sup>, tip  
969 95% CI: 0.187–0.404 sp·Myr<sup>-1</sup>), whereas the background regime again exhibited declining  
970 diversification (root 95% CI: 0.123–0.283 sp·Myr<sup>-1</sup>, tip 95% CI: 0.038–0.058 sp·Myr<sup>-1</sup>)  
971 (Figure 8d). Configurations containing additional shifts were also sampled relatively fre-  
972 quently on the IR tree, and enjoyed non-negligible support. The cumulative posterior  
973 probability of models involving 2–7 shifts amounted to 0.34, and the Bayes factor of the  
974 single-shift model compared to the next best model with 2 shifts was 1.36 (“barely worth  
975 mentioning” following the criteria of Kass and Raftery, 1995). In addition to the upshift  
976 associated with the gulls, other frequently sampled shifts occurred within the genera  
977 *Haematopus* (nodes 319–321 in Figure 5; present in 6 out of the top 22 configurations with  
978 a cumulative PP of 0.065) and *Stercorarius* (nodes 201 or 202; present in 4 out of the top  
979 22 configurations with a cumulative PP of 0.035). All of the rate shifts present in the 95%  
980 credible set of configurations represented accelerations (upshifts).

## 981 4 Discussion

### 982 4.1 Congruence and conflict in higher-level charadriiform rela- 983 tionships

984 The topologies inferred by our concatenated, species-tree, and total-evidence analyses  
985 are broadly consistent with previous estimates based on molecular data (Ericson et al.,  
986 2003; Paton et al., 2003; Paton and Baker, 2006; Baker et al., 2007; Fain and Houde, 2007;  
987 Hackett et al., 2008; Prum et al., 2015; Hu et al., 2017). Our results support the three-  
988 suborder division of the Charadriiformes into Charadrii, Scolopaci, and Lari; the position  
989 of the morphologically aberrant buttonquails (Turnicidae) as the earliest-diverging lineage  
990 within the Lari; and most of the previously proposed interfamilial relationships (Baker  
991 et al., 2007; Burleigh et al., 2015; Prum et al., 2015). In conjunction with previous work,  
992 these findings indicate that most of the higher-order charadriiform relationships are ro-  
993 bustly resolved. However, several localized areas of uncertainty persist despite the compre-  
994 hensive taxon sampling employed here.

995 Most notably, our ASTRAL species tree contradicts both previous phylogenies of  
996 the clade (Baker et al., 2007; Pereira and Baker, 2010; Burleigh et al., 2015; De Pietri  
997 et al., 2020) and our own concatenated analyses in placing the crab plover (*Dromas arde-*  
998 *ola*) closer to the auks and gulls than to the pratincoles and coursers, and in finding the  
999 Egyptian plover (*Pluvianus aegyptius*) outside of a group comprising the Chionida and  
1000 the plover–oystercatcher assemblage, as opposed to allying it with the latter clade (Fig-  
1001 ure 4). Although close examination of the branches in question revealed the presence of  
1002 better-supported alternatives consistent with the concatenation-based results, constrained  
1003 searches failed to improve on the quartet score of the unconstrained estimate. We hypoth-  
1004 esize that the relationships involving the two taxa interacted with other regions of the tree  
1005 in such a manner that their unconventional positions increased global quartet support de-  
1006 spite decreasing it locally. This phenomenon was recently noted by Rabiee and Mirarab  
1007 (2020), who showed that constrained ASTRAL searches can reveal well-supported clades



1008 absent from the main ASTRAL tree at the cost of decreasing the overall quartet score. As  
1009 a result, we do not consider the relationships of *Dromas* and *Pluvianus* to represent gen-  
1010 uine instances of gene tree/species tree discordance, but their different resolutions in the  
1011 species-tree and concatenated analyses may indicate the presence of such conflict in neigh-  
1012 boring regions of the tree.

1013 We found weak but consistent support for the monophyly of typical plovers  
1014 (Charadriidae), as opposed to previous studies that have suggested their paraphyly with  
1015 respect to Haematopodoidea and *Ibidorhyncha* (Ericson et al., 2003; Baker et al., 2007;  
1016 Fain and Houde, 2007; Burleigh et al., 2015; but see Baker et al., 2012; Hu et al., 2017).  
1017 The consistent grouping of the golden and gray plovers (*Pluvialis*) with the rest of the  
1018 Charadriidae in our species-tree as well as concatenated analyses suggests that plover  
1019 paraphyly is not an artifact of gene tree/species tree discordance, in agreement with Baker  
1020 et al. (2012). Instead, our analyses support the interpretation of this result as a stochastic  
1021 error stemming from the use of a small number of loci that happen to incorrectly resolve  
1022 the short branch connecting *Pluvialis* to the rest of the plovers. Contrary to the suggestion  
1023 of Baker et al. (2012) that mitochondrial loci may have been especially prone to inferring  
1024 the incorrect relationship due to their high mutational variance, we observed no difference  
1025 between nuclear and mitogenomic data in this regard. In fact, the nuclear loci used in this  
1026 study mostly favored paraphyly (5 out of the 8 applicable loci), which was supported by  
1027 the gene trees for RAG1 (also used by Ericson et al., 2003 and Baker et al., 2007), MB2  
1028 (used by Ericson et al., 2003), as well as ADNH, FGB7, and GAPDH (all three also used  
1029 by Fain and Houde, 2007). In contrast, mitochondrial loci narrowly supported charadriid  
1030 monophyly (8 out of the 15 loci), as did the mitochondrial genome as a whole when an-  
1031 alyzed as a single unit. This finding is consistent with the previous observation of Chen  
1032 et al. (2018) that increased locus sampling tends to overturn plover paraphyly in mtDNA  
1033 analyses (see also Hu et al., 2017). In conjunction with previous work, our results suggest  
1034 that plover monophyly is supported by both nuclear and mitochondrial genomes (Baker  
1035 et al., 2012; Hu et al., 2017; Chen et al., 2018), and underline the need for extensive gene  
1036 sampling to eliminate stochastic error.

1037 Our study helps indicate directions for future research by identifying regions of  
1038 the shorebird tree that could not be confidently resolved using the relatively small num-  
1039 ber of loci employed here. One such area of uncertainty represents the interrelationships  
1040 of the five major lineages comprising the Laridae (often classified as separate subfamilies;  
1041 Cracraft, 2013; Boyd, 2019): the gulls (Larinae), true terns (Sterninae), skimmers (*Ryn-*  
1042 *chops*), noddies (*Anous*), and white terns (*Gygis*), whose relationships have so far proved  
1043 elusive (Chu, 1998; Paton and Baker, 2006; Baker et al., 2007; Fain and Houde, 2007;  
1044 Burleigh et al., 2015; Hu et al., 2017). This uncertainty is expected given the combination  
1045 of very short internodes connecting the five taxa and the relatively long branches subtend-  
1046 ing them, a feature characteristic of ancient rapid radiations (Lanyon, 1988; Whitfield and  
1047 Lockhart, 2007). However, our node-dating analyses show that the corresponding diver-  
1048 gences unfolded over a period of approximately 6–7 Myr, suggesting they were not so rapid  
1049 as to be intractable. As a result, longer alignments relying on data from ultraconserved  
1050 elements (Faircloth et al., 2012), exon capture (Bragg et al., 2016), or whole-genome se-  
1051 quencing (Jarvis et al., 2014; Zhang et al., 2014) may be more successful at resolving the  
1052 larid radiation. The same is likely to be true of the interrelationships of the six extant true

1053 auk genera (*Alca*, *Alle*, *Uria*, *Synthliboramphus*, *Brachyramphus*, and *Cepphus*), where dis-  
1054 agreements occur both among earlier studies (Baker et al., 2007; Smith and Clarke, 2015)  
1055 and among the different analytical approaches employed here (Figure 4). Finally, topologi-  
1056 cal conflict is also rampant among the sandpipers (Scolopacidae), especially with regard to  
1057 the position of the jacksnipe (*Lymnocryptes*), the monophyly of the dowitchers (*Limnodro-*  
1058 *mus*), the membership of the Polynesian sandpipers (*Prosobonia*) in the Arenariinae *sensu*  
1059 Banks (2012) (*Arenaria* + *Calidris*), and the exact sequence of divergences within the  
1060 Tringinae (Figure 4). While the last two of these relationships are again associated with  
1061 extremely short internodes and have been uncertain in previous studies (Baker et al., 2007;  
1062 Cibois et al., 2012; Gibson and Baker, 2012; De Pietri et al., 2020), the differences between  
1063 the species-tree and concatenated analyses detected for *Limnodromus* and *Lymnocryptes*  
1064 hint at the presence of other problems, such as gene tree estimation error or genuine gene  
1065 tree/species tree discordance.

1066 Despite maximizing taxon sampling based on the available molecular and morpho-  
1067 logical data, our study still contains gaps in taxonomic coverage that suggest where ad-  
1068 ditional sampling effort should be directed. Of the 13 non-monotypic charadriiform fam-  
1069 ilies, the buttonquails (Turnicidae) had the lowest coverage in the present study (7 out  
1070 of 17 species), and currently available sequence data do not even make it possible to test  
1071 whether *Turnix* is monophyletic with respect to the monotypic *Ortyxelos*. We suggest that  
1072 sequencing the latter genus as well as additional *Turnix* species should be a priority for  
1073 future studies seeking to improve taxon sampling within the Charadriiformes.

## 1074 4.2 Taxonomic implications

1075 While the higher-level phylogeny of the Charadriiformes is generally well-established, the  
1076 comprehensive taxon sampling of our study helps reveal instances of nonmonophyly at the  
1077 genus level. Despite the low support values often associated with shallower relationships  
1078 in our trees, several of these results are robust enough to motivate changes to the cur-  
1079 rent taxonomies of the clade. Our findings lend support to classifying the double-banded  
1080 courser as the sole member of the genus *Smutornis*, following Clements et al. (2019),  
1081 in contrast to other recent treatments that consider it a species of *Rhinoptilus* (“*R.*”  
1082 *africanus*; Dickinson and Remsen, 2013; Boyd, 2019; De Pietri et al., 2020). Although  
1083 at least one molecular phylogeny showed the species to be nested within a monophyletic  
1084 *Rhinoptilus* (Cohen, 2011), our concatenated and total-evidence analyses find moderate to  
1085 strong support (RAxML BS/IC = 87%/0.564, ExaBayes PP = 0.73, TE BS = 85%) for  
1086 a node uniting it with *Cursorius* and *Glareola* instead, in agreement with Burleigh et al.  
1087 (2015) and with earlier observations noting its morphological and behavioral differences  
1088 from the *Rhinoptilus* coursers (del Hoyo and Collar, 2014).

1089 Our analyses yield a scolopacid topology that is highly similar to the phylogeny of  
1090 Gibson and Baker (2012), as expected given their reliance on much of the same sequence  
1091 data. Accordingly, our findings are consistent with the changes implemented by recent tax-  
1092 onomies in response to the latter study, including the expansion of the genera *Calidris* and  
1093 *Tringa* to ensure their monophyly (Dickinson and Remsen, 2013; Boyd, 2019; Clements  
1094 et al., 2019), and the reassignment of the imperial snipe to a separate genus (*Chubbia*) to  
1095 preserve the monophyly of *Gallinago* (Boyd, 2019). In contrast, the narrow concept of the

1096 genus *Charadrius* and the reassignment of most of its former species to the resurrected  
1097 genera *Afroxyechus*, *Eupoda*, and *Ochthodromus*, while adopted by the taxonomy employed  
1098 here (Boyd, 2019) to reflect recent phylogenetic findings (Barth et al., 2013; Dos Reme-  
1099 dios et al., 2015), does not fit our results substantially better than alternative taxonomies  
1100 (Dickinson and Remsen, 2013; Clements et al., 2019).

1101 We corroborate previous findings (Barth et al., 2013; Burleigh et al., 2015;  
1102 Dos Remedios et al., 2015) showing that most of the species traditionally assigned to  
1103 *Charadrius* are more closely related to *Anarhynchus*, *Erythrogonys*, and the Vanellinae  
1104 than to the type (*C. hiaticula*), thus violating the monophyly of the genus and of the sub-  
1105 family Charadriinae as traditionally defined (Cracraft, 2013). We also find *Anarhynchus*  
1106 to be deeply nested within the clade consisting of most of the former *Charadrius* species  
1107 (“CRD II” *sensu* Dos Remedios et al., 2015; Anarhynchinae *sensu* Boyd, 2019), although  
1108 its exact position with respect to the latter differs here from the earlier analyses despite  
1109 no appreciable differences in taxon sampling. Our results support the reassignment of  
1110 “*Charadrius*” *bicinctus* to *Anarhynchus* in light of their sister-group relationship (AS-  
1111 TRAL localPP = 0.44, RAxML BS/IC = 53%/0.065, ExaBayes PP = 0.56, TE BS =  
1112 49%), and show a moderately well-supported (RAxML BS/IC = 71%/0.327, ExaBayes PP  
1113 = 0.98, TE BS = 62%) early-diverging clade consisting of the greater sand plover (“*C.*”  
1114 *leschenaultii*), oriental plover (“*C.*” *veredus*), and mountain plover (“*C.*” *montanus*), for  
1115 which the name *Eupoda* was resurrected by Boyd (2019). However, instead of allying the  
1116 Caspian plover (“*C.*” *asiaticus*) with the rest of the genus *Eupoda* (of which it is the type  
1117 species) and the New Zealand plover (“*C.*” *obscurus*) with *Anarhynchus*, as in Barth et al.  
1118 (2013) and Dos Remedios et al. (2015), our concatenated and total-evidence analyses show  
1119 both taxa to form a robust clade (RAxML BS/IC = 80%/0.305, ExaBayes PP = 1, TE  
1120 BS = 82%) that is more closely related to *Ochthodromus* than to either *Anarhynchus* or  
1121 *Eupoda* (RAxML, TE), or even deeply nested within *Ochthodromus* (ExaBayes). Interest-  
1122 ingly, the ASTRAL species tree does recover *Eupoda* and *Anarhynchus sensu* Boyd (2019)  
1123 as monophyletic with localPP values of 0.97 and 0.31, respectively. To safeguard generic  
1124 monophyly under both of the competing hypotheses, we suggest combining the genera  
1125 *Anarhynchus*, *Eupoda*, and *Ochthodromus*, in which case *Anarhynchus* Quoy and Gaimard  
1126 1830 takes the priority. The subfamily Anarhynchinae would then comprise the genera  
1127 *Anarhynchus*, *Erythrogonys*, and *Peltohyas*, which are universally recognized by major  
1128 taxonomies (Dickinson and Remsen, 2013; Boyd, 2019; Clements et al., 2019).

1129 The second major assemblage of the former *Charadrius* species (“CRD I” *sensu*  
1130 Dos Remedios et al., 2015; Charadriinae *sensu* Boyd, 2019) is rendered nonmonophyletic  
1131 by the inclusion of the genera *Thinornis* and *Afroxyechus*. Like Barth et al. (2013) and  
1132 Dos Remedios et al. (2015), we find that the former genus is itself nonmonophyletic, as  
1133 its two species (*T. novaeseelandiae* and *T. rubricollis*) span a clade that also includes two  
1134 plovers usually assigned to *Charadrius* (“*C.*” *dubius* and “*C.*” *forbesi*) as well as the black-  
1135 fronted dotterel, occasionally placed in its own separate genus (“*Elsayornis*” *melanops*).  
1136 These results therefore support the expansion of *Thinornis* following Boyd (2019). How-  
1137 ever, we find the three-banded plover (“*Afroxyechus*” *tricoloris*) to be nested within the  
1138 expanded *Thinornis* as well, contrasting with the results of Dos Remedios et al. (2015)  
1139 who found it outside of the (*Charadrius* + *Thinornis*) clade. The latter result was ex-  
1140 tremely weakly supported (PP = 0.47) and only appeared in the concatenated analysis

1141 despite its absence from any of the individual gene trees, whereas we find strong support  
1142 for the inclusion of “*A.*” *tricoloris* within *Thinornis* (ASTRAL localPP = 0.85, RAxML  
1143 BS/IC = 78%/0.581, ExaBayes PP = 1, TE BS = 63%), a position also favored by 5 out  
1144 of the 6 gene trees of Dos Remedios et al. (2015). We therefore suggest that the species  
1145 be reassigned to this genus as a new combination, *Thinornis tricoloris*. More surpris-  
1146 ingly, another species formerly recovered within and reassigned to *Thinornis*, the long-  
1147 billed plover (“*T.*” *placidus*; see Dos Remedios et al., 2015; Boyd, 2019), is found here to  
1148 be deeply nested within *Ochthodromus* (*Anarhynchus* in our preferred taxonomy), possi-  
1149 bly as a result of differences in the sampling of the mitochondrial genome (4 genes used by  
1150 Dos Remedios et al., 2015 vs. 15 genes used here). We refrain from making taxonomic rec-  
1151 ommendations for this species pending results from analyses with broader locus sampling.

1152 Our final recommendation concerns the pied lapwing (“*Vanellus*” *cayanus*), whose  
1153 affinity to other lapwings (*Vanellus*) remains doubtful (Figure 4). Of the analyses per-  
1154 formed here, only the total-evidence tree supported its inclusion within the genus, but  
1155 with virtually no bootstrap support (9%), and only as the sister species to all other  
1156 members of the genus. In contrast, other analyses variously placed the pied lapwing in  
1157 a sister-group relationship with *Oreopholus* (ASTRAL; localPP = 0.67), all charadriids  
1158 other than *Oreopholus* and *Pluvialis* (RAxML; BS/IC = 36%/0.011), or the (Vanellinae  
1159 + Anarhynchinae) clade (ExaBayes; PP = 0.29). To account for this range of hypotheses,  
1160 we propose to resurrect the genus *Hoploxypterus* Bonaparte 1856 for the species. The sub-  
1161 family Vanellinae, currently redundant in most taxonomies with respect to *Vanellus*, could  
1162 then represent a useful name for the (*Vanellus* + *Hoploxypterus*) group, should it prove to  
1163 be monophyletic.

### 1164 4.3 A new timeline for charadriiform evolution

1165 The mid-Paleocene origin of the charadriiform crown inferred here is consistent with an  
1166 explosive radiation of neoavian lineages in the wake of the end-Cretaceous mass extinction  
1167 (Ericson et al., 2006; Suh, 2016; Berv and Field, 2017), and (unlike the early mitogenomic  
1168 timescales; Paton et al. 2002; Pereira and Baker 2006; Baker et al. 2007) does not require  
1169 positing a long period during which the clade supposedly diversified but failed to leave  
1170 behind a fossil record. The near-complete absence of support for a Cretaceous origin of  
1171 shorebirds (PP < 0.01) in this study is remarkable, since our root calibration was designed  
1172 to allow for this possibility (Table 2), and consequently saw one of the greatest shifts  
1173 between the effective prior and the posterior (Figure 7). At the same time, our age esti-  
1174 mates for the charadriiform root (IR mean: 59.3 Ma, AR mean: 58.1 Ma) are older than  
1175 the early Eocene dates favored by many recent studies (Smith, 2011: 53.6 Ma; Claramunt  
1176 and Cracraft, 2015: 53.5 Ma; Prum et al., 2015: 48.8–50.6 Ma; Smith and Clarke, 2015:  
1177 49.3 Ma; cf. Figure 1). Given the recent evidence for the crown-charadriiform affinities  
1178 of fossil specimens from the early Eocene of Virginia (SMF Av 619; Mayr, 2016) and the  
1179 Paleocene–Eocene boundary of Mongolia (IGM 100/1435; Hood et al., 2019), presented  
1180 by Musser and Clarke (2020) and corroborated by our constrained Bayesian re-analyses  
1181 of their dataset, these earlier estimates must now be viewed as contradicting the known  
1182 fossil record. The fact that the fossil evidence most relevant to the age of the charadriiform  
1183 root only emerged one year before the completion of this study (Figure 1) illustrates the



1184 fast pace at which calibrations continue to be superseded and replaced, and serves as a  
1185 reminder of the need to use up-to-date fossil information in calibration design (Ksepka  
1186 et al., 2015; Marjanović, 2021).

1187 Our timeline for shorebird evolution is compatible with the positions of both SMF  
1188 Av 619 and IGM 100/1435 within the charadriiform crown, despite the fact that their in-  
1189 clusion therein was not strictly enforced: our soft-bounded root age prior placed nonzero  
1190 probability on ages younger than those of the two fossils, and this probability increased af-  
1191 ter analyzing the sequence data (section 3.6). However, while our re-analyses of the Musser  
1192 and Clarke (2020) dataset found weak but consistent support for the placement of the  
1193 two fossils within the total groups of Larida and Chionoidea, respectively, our divergence  
1194 time estimates preclude their inclusion in these clades. Our point estimates for the Lar-  
1195 ida/Turnicidae divergence are very slightly younger (IR mean: 52.8 Ma, AR mean: 52.5  
1196 Ma) than SMF Av 619 (54.17–53.7 Ma based on calcareous nannoplankton zonation; An-  
1197 thonissen and Ogg, 2012; Mayr, 2016), whose age is nevertheless still included in the cor-  
1198 responding 95% credibility intervals. Our dating of the Chionoidea/Burhinidae divergence  
1199 (IR mean: 40.9 Ma, AR mean: 44.3 Ma) is substantially younger than the estimated age  
1200 of IGM 100/1435 (~55.88 Ma; see Supplementary Information), which was even excluded  
1201 from the relevant 95% CIs under both relaxed clock models. Should more evidence emerge  
1202 for a deeply nested phylogenetic position of early Eocene fossils, the timescale presented  
1203 here would have to be altered by shifting the root age even deeper into the past, and/or  
1204 by positing a more rapid succession of the interfamilial divergences.

1205 In addition to the origin of the order, our timescale also diverges from recent phy-  
1206 logenomic studies with respect to the age of individual charadriiform subclades. Compared  
1207 to the pseudoposterior of Jetz et al. (2012), our posterior mean ages inferred under the IR  
1208 model were so young as to be excluded from the 95% pseudoposterior CIs for Chionida  
1209 (40.9 Ma vs. 41.9–66.1 Ma), Charadriidae (37.4 Ma vs. 37.5–59.2 Ma), Thinocoroidea (27.9  
1210 Ma vs. 28.9–48.7 Ma), Jacanoidea (33.7 Ma vs. 33.8–54.2 Ma), and Rostratulidae (20.0 Ma  
1211 vs. 22.9–40.5 Ma); for the last three clades, this was also true under the AR model, in ad-  
1212 dition to Jacanida (35.3 Ma vs. 37.0–58.1 Ma) and Jacanidae (24.7 Ma vs. 27.0–45.1 Ma).  
1213 For Larida and its constituent families (Alcidae, Glareolidae, Laridae, Stercorariidae) and  
1214 superfamilies (Alcoidea, Glareoloidea), the difference was even more pronounced but op-  
1215 posite in direction, as we found all of these clades to be significantly older than suggested  
1216 by the Jetz et al. (2012) time tree distribution. Regardless of the clock model used, not  
1217 only their means but also their entire 95% CIs fell outside of those derived from the Jetz  
1218 et al. (2012) pseudoposterior, which produced mean ages for the Alcidae and the Sterco-  
1219 rariidae that were less than half as old as the IR posterior means yielded by the present  
1220 study (16.0 vs 33.2 Ma and 7.4 vs 16.7 Ma, respectively). Our estimates for the ages of Al-  
1221 coidea, the (Alcoidea + Laridae) clade, and Larida also exceed those of other recent anal-  
1222 yses (Claramunt and Cracraft, 2015; Prum et al., 2015; Kuhl et al., 2020), although they  
1223 are not as old as suggested by early studies that relied on obsolete calibrations (Pereira  
1224 and Baker, 2008).

1225 The difference can be largely explained by our use of calibration 8 (Table 2), repre-  
1226 senting a late Eocene pan-alcid of uncertain affinities whose position within the clade was  
1227 nevertheless supported by a formal phylogenetic analysis (Smith, 2011). The post-Eocene  
1228 dates suggested for the Alcidae/Stercorariidae divergence (or even more inclusive clades)



1229 by recent studies therefore exemplify the “zombie lineage” problem described by Springer  
1230 et al. (2017), in which molecular divergence times turn out to be younger than the known  
1231 fossil record allows. The same underestimation of divergence times was recently reported  
1232 for the Gruiformes by Musser et al. (2019), and may be relatively widespread as a result  
1233 of efforts to correct for the implausibly old divergences yielded by earlier studies by means  
1234 of overly stringent calibration choice. Conversely, the criteria employed here that allowed  
1235 calibration 8 to be used could be criticized as too lax given the fragmentary nature of the  
1236 material and the long temporal gap separating it from the next oldest pan-alcid occur-  
1237 rence. Ultimately, this problem may only be resolved by total-evidence tip-dating analyses  
1238 (Ronquist et al., 2012a; Heath et al., 2014), which co-estimate tree topology and diver-  
1239 gence times for extant and fossil taxa alike while allowing the phylogenetic position of the  
1240 fossils to be informed by both their morphology and their stratigraphic age. Such analyses  
1241 unfortunately remain computationally prohibitive for datasets as taxon-rich as ours. In the  
1242 absence of a viable alternative to node-dating, the question of the age of Alcoidea illus-  
1243 trates the overwhelming influence of calibration choice on the outcomes of divergence time  
1244 estimation – a statistical problem that is not fully identifiable without fossil data (Ran-  
1245 nala, 2016).

1246 Our ability to infer the timescale of charadriiform evolution with confidence is lim-  
1247 ited by the discordance between the results based on two different relaxed clock models,  
1248 and by the lack of unambiguous support for one model over the other. Unfortunately,  
1249 Bayes factor model comparisons cannot be conducted on phylogenies with hundreds of  
1250 tips, since the likelihood approximation that makes MCMCTree analyses tractable for  
1251 trees of such size is not valid for parameter values far removed from the likelihood peak,  
1252 which are frequently visited in the course of marginal likelihood estimation (dos Reis and  
1253 Yang, 2011; dos Reis et al., 2018). As a result, model comparisons have to be restricted  
1254 to subsets of the full tree that are small enough for exact likelihood calculation to remain  
1255 feasible. While previous studies that made use of such restricted analyses obtained consis-  
1256 tent results under different subsampling schemes (dos Reis et al., 2018; McGowen et al.,  
1257 2019), we find the preferred model to differ between the 19-species and 40-species schemes  
1258 employed here (Table 5). Moreover, the direction of the change in model preference is un-  
1259 expected, since the signal for rate autocorrelation should be more difficult to detect in  
1260 sparsely sampled trees with long periods of time separating individual branching events  
1261 (Drummond et al., 2006; Brown and van Tuinen, 2011). Here, it was the sparser 19-species  
1262 dataset that favored rate autocorrelation over the independent-rates model. The resulting  
1263 incongruence is substantial, as the autocorrelated-rates model estimates much older ages  
1264 for many of the shallower nodes (Figure 6), raising concerns about the effect of this dif-  
1265 ference on downstream inferences (see below). Without more efficient marginal likelihood  
1266 estimators to help choose between competing relaxed clock models, the more recent half of  
1267 the shorebird evolutionary timeline remains subject to considerable uncertainty.

1268 Recent node-dating studies have discouraged the use of truncated Cauchy cali-  
1269 bration densities, finding them to be more prone to truncation and consequent deviation  
1270 from the user-specified prior than simple uniform densities (dos Reis et al., 2018; Su et al.,  
1271 2021). Additionally, they have been criticized for being overly informative to the extent  
1272 that the sequence data may not be able to meaningfully update them (Su et al., 2021), or  
1273 for being so heavy-tailed as to allow calibration interactions to pull the corresponding joint

1274 prior too deep into the past (dos Reis et al., 2018). Here, we have only observed these ef-  
1275 fects on a limited scale. The user-specified prior was generally close to the joint prior, and  
1276 both often (though not always) deviated from the posterior (Figure 7), in both cases ex-  
1277 hibiting the behavior one would ideally expect from a calibrated analysis. Nevertheless,  
1278 instances of the effective prior being pulled deeper into the past were observed for cali-  
1279 brations 7 and 9–11 (Figure 7), an effect likely attributable to interactions between the  
1280 user-specified densities assigned to nested clades. For approximately half of the calibrated  
1281 nodes, there was little movement between the joint prior and the posterior, although this  
1282 failure to update the effective prior was not as pervasive as recently reported (Brown and  
1283 Smith, 2018). Moreover, the small number of loci employed here likely did not exhaust the  
1284 ability of molecular data to update node age priors. Plotting 95% CI width against pos-  
1285 terior mean node ages (“infinite-sites plots” *sensu* Rannala and Yang, 2007) reveals con-  
1286 siderable scatter about the regression line (Supplementary Information, Fig. S11), indicat-  
1287 ing that uncertainty in the estimated divergence times cannot be attributed solely to the  
1288 fossil calibrations, but includes sequence-data sampling error as well (Rannala and Yang,  
1289 2007; Inoue et al., 2009; dos Reis et al., 2018; McGowen et al., 2019). We therefore expect  
1290 that the use of longer alignments will improve not only topological inference within the  
1291 Charadriiformes, but also the precision of their estimated divergence times.

#### 1292 4.4 Tempo and mode of shorebird diversification

1293 Our BAMM analyses of shorebird macroevolutionary dynamics yielded drastically dif-  
1294 ferent results depending on the time tree used (Figure 8). The inference based on the  
1295 independent-rates tree showed that a clade comprising 4 genera of gulls (including a total  
1296 of 48 species; Boyd, 2019) entered a new diversification regime characterized by acceler-  
1297 ated rates of speciation and extinction that have not appreciably declined since the clade’s  
1298 origin. This scenario is consistent with the findings of Jetz et al. (2012), who identified  
1299 a gull clade of similar composition and size (44 species) as the single fastest-diversifying  
1300 group of extant birds. Their estimate of the net diversification rate was even higher (0.74  
1301 vs. 0.29 sp·Myr<sup>-1</sup>) as a result of a younger origin inferred for the clade (4.6 vs 12.2 Ma).  
1302 In contrast, the BAMM analysis based on the autocorrelated-rates tree found little evi-  
1303 dence for clade-specific diversification regimes, or any notable speed-up within the gulls  
1304 (Figure 8a).

1305 A close examination shows that this lack of congruence is due entirely to the drasti-  
1306 cally different divergence times estimated for the gull radiation by the two relaxed clocks.  
1307 Both the IR and AR models infer similar ages for Laridae as a whole (IR mean: 35.0 Ma,  
1308 AR mean: 40.3 Ma), but disagree on the ages of the gulls (Larinae; IR mean: 18.8 Ma,  
1309 AR mean: 31.3 Ma), the shifted node (*Chroicocephalus* + *Larus*; IR mean: 12.2 Ma, AR  
1310 mean: 26.1 Ma), and most of the individual larine genera, including the species-rich *Larus*  
1311 (IR mean: 5.9 Ma, AR mean: 18.7 Ma). In all these cases, the 95% posterior CIs failed  
1312 to overlap under the two clock models (Figure 6). This conflict appears to follow directly  
1313 from the different assumptions made by the two models about the distribution of branch  
1314 rates across the tree. The AR model, which disfavors sudden shifts, prefers to assign sim-  
1315 ilar rates to the parent and daughter branches, and consequently ended up distributing  
1316 divergence times evenly between the origin of Laridae and the present (Supplementary In-

1317 formation, Fig. S13 and Table S1). In contrast, under the IR model, each branch rate rep-  
1318 resents an independent draw from a lognormal distribution, so that the highest-probability  
1319 rates can differ drastically even between the parent and daughter branches if required by  
1320 the data (Drummond et al., 2006). The strong impact of clock model choice on the esti-  
1321 mated macroevolutionary rates contrasts with previous simulation-based research finding  
1322 the latter to be largely unaffected by the choice between strict and independent-rates re-  
1323 laxed clocks (Sarver et al., 2019), and suggests that the sensitivity of diversification rate  
1324 analyses to the assumptions made in time tree inference should be widely explored in em-  
1325 pirical systems.

## 1326 **5 Conclusions**

1327 The densely sampled, time-calibrated, total-evidence tree of shorebirds presented here is  
1328 a major step toward understanding the evolution of one of the most ecomorphologically  
1329 diverse and species-rich clades of non-passerine birds. It represents a substantial advance  
1330 over earlier studies that were not consistent with the fossil record of the group, did not in-  
1331 clude as many species, or only did so without informing their placement by character data.  
1332 We expect that the availability of a generally well-resolved phylogeny accounting for nearly  
1333 nine tenths of the extant diversity of the clade will greatly facilitate future comparative,  
1334 biogeographical, and macroecological studies of shorebirds. In addition to highlighting ar-  
1335 eas of robust support, which span nearly the entire suprafamilial backbone of the charadri-  
1336 iform tree, we also identify regions of persisting uncertainty to be prioritized by future  
1337 analyses with increased taxon and locus sampling. Our study demonstrates the importance  
1338 of new fossil evidence for inferring evolutionary timescales, and serves as a cautionary note  
1339 about the impact of modeling choices on downstream inferences, with implications for the  
1340 Charadriiformes and beyond.

## 1341 **Funding**

1342 The authors received no funding for this work.

## 1343 **Acknowledgments**

1344 We are grateful to Mario dos Reis, Siavash Mirarab, and Alexis Stamatakis for their help  
1345 with the methods and software used in this study. We further thank the wildlife photog-  
1346 raphers whose work features in this paper for making their art available under Creative  
1347 Commons licenses, Simon Ho for providing us with the time trees used to generate Figure  
1348 1, and Susan Kidwell for sharing stratigraphic information relevant to calibration design.  
1349 Early drafts of the manuscript were improved by comments from John Bates and Graham  
1350 Slater. Marginal likelihood estimation was performed on the Midway2 Research Comput-  
1351 ing Cluster at the University of Chicago.

## 1352 Competing interests

1353 There are no competing interests to declare.

## 1354 Data accessibility

1355 All GenBank accession numbers, alignments, tree files, configuration files, and R scripts  
1356 are available from the Dryad Digital Repository: <http://dx.doi.org/10.5061/dryad.nnnnnnnn>.  
1357

## 1358 References

- 1359 Aberer, A. J., Kobert, K., and Stamatakis, A. (2014). ExaBayes: massively parallel  
1360 Bayesian tree inference for the whole-genome era. *Mol. Biol. Evol.*, 31(10):2553–2556.
- 1361 Anthonissen, D. E. and Ogg, J. G. (2012). Cenozoic and Cretaceous biochronology of  
1362 planktonic foraminifera and calcareous nannofossils. In Gradstein, F. M., Ogg, J. G.,  
1363 Schmitz, M. D., and Ogg, G. M., editors, *The Geologic Time Scale 2012*, pages 1083–  
1364 1127. Elsevier, Boston, MA.
- 1365 Baker, A. J., Pereira, S. L., and Paton, T. A. (2007). Phylogenetic relationships and diver-  
1366 gence times of Charadriiformes genera: multigene evidence for the Cretaceous origin of  
1367 at least 14 clades of shorebirds. *Biol. Lett.*, 3(2):205–210.
- 1368 Baker, A. J., Yatsenko, Y., and Tavares, E. S. (2012). Eight independent nuclear genes  
1369 support monophyly of the plovers: The role of mutational variance in gene trees. *Mol.*  
1370 *Phylogenet. Evol.*, 65(2):631–641.
- 1371 Banks, R. C. (2012). Classification and nomenclature of the sandpipers (Aves: Arenari-  
1372 inae). *Zootaxa*, 3513(1):86–88.
- 1373 Barbosa, A. and Moreno, E. (1999). Evolution of foraging strategies in shorebirds: An  
1374 ecomorphological approach. *Auk*, 116(3):712–725.
- 1375 Barth, J. M. I., Matschiner, M., and Robertson, B. C. (2013). Phylogenetic position and  
1376 subspecies divergence of the endangered New Zealand Dotterel (*Charadrius obscurus*).  
1377 *PLOS ONE*, 8(10):e78068.
- 1378 Benson, D. A., Cavanaugh, M., Clark, K., Karsch-Mizrachi, I., Lipman, D. J., Ostell, J., ,  
1379 and Sayers, E. W. (2013). Genbank. *Nucl. Acids Res.*, 41:D36–D42.
- 1380 Benton, M. J. and Donoghue, P. C. J. (2006). Paleontological evidence to date the tree of  
1381 life. *Mol. Biol. Evol.*, 24(1):26–53.
- 1382 Berger, S. A. and Stamatakis, A. (2010). Accuracy of morphology-based phylogenetic fos-  
1383 sil placement under maximum likelihood. In *ACS/IEEE International Conference on*  
1384 *Computer Systems and Applications – AICCSA 2010*, pages 1–9.

- 1385 Berger, S. A., Stamatakis, A., and Lücking, R. (2011). Morphology-based phylogenetic  
1386 binning of the lichen genera *Graphis* and *Allographa* (Ascomycota: Graphidaceae) using  
1387 molecular site weight calibration. *Taxon*, 60(5):1450–1457.
- 1388 Berv, J. S. and Field, D. J. (2017). Genomic signature of an avian Lilliput Effect across  
1389 the K-Pg extinction. *Syst. Biol.*, 67(1):1–13.
- 1390 Bininda-Emonds, O. R. P. (2014). An introduction to supertree construction (and parti-  
1391 tioned phylogenetic analyses) with a view toward the distinction between gene trees and  
1392 species trees. In Garamszegi, L. Z., editor, *Modern Phylogenetic Comparative Methods  
1393 and Their Application in Evolutionary Biology: Concepts and Practice*, chapter 3, pages  
1394 49–76. Springer-Verlag, Berlin, Germany.
- 1395 Björklund, M. (1994). Phylogenetic relationships among Charadriiformes: Reanalysis of  
1396 previous data. *Auk*, 111(4):825–832.
- 1397 Boyd, J. H. (2019). Taxonomy in Flux: Version 3.05, August 2, 2019. [http://jboyd.net/  
1398 Taxo/List.html](http://jboyd.net/Taxo/List.html). Accessed September 29, 2020.
- 1399 Bragg, J. G., Potter, S., Bi, K., and Moritz, C. (2016). Exon capture phylogenomics: effi-  
1400 cacy across scales of divergence. *Mol. Ecol. Resour.*, 16(5):1059–1068.
- 1401 Bridge, E. S., Jones, A. W., and Baker, A. J. (2005). A phylogenetic framework for  
1402 the terns (Sternini) inferred from mtDNA sequences: implications for taxonomy and  
1403 plumage evolution. *Mol. Phylogenet. Evol.*, 35(2):459–469.
- 1404 Brodkorb, P. (1967). Catalogue of fossil birds: part 3 (Ralliformes, Ichthyornithiformes,  
1405 Charadriiformes). *Bull. Florida State Mus., Biol. Sci.*, 11(3):99–220.
- 1406 Brown, C. and Ward, D. (1990). The morphology of the syrinx in the Charadriiformes  
1407 (Aves): Possible phylogenetic implications. *Bonn. zool. Beitr.*, 41(2):95–107.
- 1408 Brown, J. W., Payne, R. B., and Mindell, D. P. (2007). Nuclear DNA does not reconcile  
1409 ‘rocks’ and ‘clocks’ in Neoaves: a comment on Ericson *et al.* *Biol. Lett.*, 3(3):257–260.
- 1410 Brown, J. W., Rest, J. S., García-Moreno, J., Sorenson, M. D., and Mindell, D. P. (2008).  
1411 Strong mitochondrial DNA support for a Cretaceous origin of modern avian lineages.  
1412 *BMC Biol.*, 6(1):6.
- 1413 Brown, J. W. and Smith, S. A. (2018). The past sure is tense: On interpreting phyloge-  
1414 netic divergence time estimates. *Syst. Biol.*, 67(2):340–353.
- 1415 Brown, J. W. and van Tuinen, M. (2011). Evolving perceptions on the antiquity of the  
1416 modern avian tree. In Dyke, G. J. and Kaiser, G., editors, *Living Dinosaurs: The Evolu-  
1417 tionary History of Modern Birds*, pages 306–324. John Wiley & Sons, London, UK.
- 1418 Burleigh, J. G., Kimball, R. T., and Braun, E. L. (2015). Building the avian tree of life  
1419 using a large-scale, sparse supermatrix. *Mol. Phylogenet. Evol.*, 84:53–63.



- 1420 Chazot, N., Wahlberg, N., Freitas, A. V. L., Mitter, C., Labandeira, C., Sohn, J.-C., Sa-  
1421 hoo, R. K., Seraphim, N., de Jong, R., and Heikkilä, M. (2019). Priors and posteriors  
1422 in Bayesian timing of divergence analyses: The age of butterflies revisited. *Syst. Biol.*,  
1423 68(5):797–813.
- 1424 Chen, W., Zhang, C., Pan, T., Liu, W., Li, K., Hu, C., and Chang, Q. (2018). The mi-  
1425 tochondrial genome of the Kentish Plover *Charadrius alexandrinus* (Charadriiformes:  
1426 Charadriidae) and phylogenetic analysis of Charadrii. *Genes Genom.*, 40(9):955–963.
- 1427 Chu, P. C. (1995). Phylogenetic reanalysis of Strauch’s osteological data set for the  
1428 Charadriiformes. *Condor*, 97(1):174–196.
- 1429 Chu, P. C. (1998). A phylogeny of the gulls (Aves: Larinae) inferred from osteological and  
1430 integumentary characters. *Cladistics*, 14(1):1–43.
- 1431 Cibois, A., Dekker, R. W. R. J., Pasquet, E., and Thibault, J.-C. (2012). New insights into  
1432 the systematics of the enigmatic Polynesian sandpipers *Aechmorhynchus parvirostris*  
1433 and *Prosobonia leucoptera*. *Ibis*, 154(4):756–767.
- 1434 Claramunt, S. and Cracraft, J. (2015). A new time tree reveals Earth history’s imprint on  
1435 the evolution of modern birds. *Sci. Adv.*, 1(11):e1501005.
- 1436 Clements, J. F., Schulenberg, T. S., Iliff, M. J., Billerman, S. M., Fredericks, T. A., Sulli-  
1437 van, B. L., and Wood, C. L. (2019). The eBird/Clements checklist of birds of the world:  
1438 v2019. <http://www.birds.cornell.edu/clementschecklist/download>. Accessed  
1439 September 29, 2020.
- 1440 Cohen, C. (2011). *The phylogenetics, taxonomy and biogeography of African arid zone ter-  
1441 restrial birds: the bustards (Otididae), sandgrouse (Pteroclididae), coursers (Glareolidae)  
1442 and Stone Partridge (Ptilopachus)*. PhD thesis, University of Cape Town.
- 1443 Cracraft, J. (1981). Toward a phylogenetic classification of the recent birds of the world  
1444 (Class Aves). *Auk*, 98(4):681–714.
- 1445 Cracraft, J. (2013). Avian higher-level relationships and classification: Nonpasseriforms. In  
1446 Dickinson, E. C. and Remsen, J. V., editors, *The Howard and Moore Complete Checklist  
1447 of the Birds of the World, Volume 1: Non-passerines (4th edition)*, pages xxi–xliii. Aves  
1448 Press, Eastbourne, UK.
- 1449 Cracraft, J., Barker, F. K., Braun, M., Harshman, J., Dyke, G. J., Feinstein, J., Stanley,  
1450 S., Cibois, A., Schikler, P., Beresford, P., García-Moreno, J., Sorenson, M. D., Yuri, T.,  
1451 and Mindell, D. P. (2004). Phylogenetic relationships among modern birds (Neornithes):  
1452 toward an avian tree of life. In Cracraft, J. and Donoghue, M. J., editors, *Assembling  
1453 the Tree of Life*, pages 468–489. Oxford University Press, New York.
- 1454 Cracraft, J., Houde, P., Ho, S. Y. W., Mindell, D. P., Fjeldså, J., Lindow, B., Edwards,  
1455 S. V., Rahbek, C., Mirarab, S., Warnow, T., Gilbert, M. T. P., Zhang, G., Braun, E. L.,  
1456 and Jarvis, E. D. (2015). Response to Comment on “Whole-genome analyses resolve  
1457 early branches in the tree of life of modern birds”. *Science*, 349(6255):1460b.

- 1458 Crochet, P.-A., Bonhomme, F., and Lebreton, J.-D. (2000). Molecular phylogeny and  
1459 plumage evolution in gulls (Larini). *J. Evol. Biol.*, 13(1):47–57.
- 1460 Czech, L., Barbera, P., and Stamatakis, A. (2020). Genesis and Gappa: processing, analyz-  
1461 ing and visualizing phylogenetic (placement) data. *Bioinform.*, 36(10):3263–3265.
- 1462 De Pietri, V. L., Worthy, T. H., Scofield, R. P., Cole, T. L., Wood, J. R., Mitchell, K. J.,  
1463 Cibois, A., Jansen, J. J. F. J., Cooper, A. J., Feng, S., Chen, W., Tennyson, A. J. D.,  
1464 and Wragg, G. M. (2020). A new extinct species of Polynesian sandpiper (Charadri-  
1465 iformes: Scolopacidae: *Prosobonia*) from Henderson Island, Pitcairn Group, and the phy-  
1466 logenetic relationships of *Prosobonia*. *Zool. J. Linn. Soc.*
- 1467 Degnan, J. H. and Rosenberg, N. A. (2006). Discordance of species trees with their most  
1468 likely gene trees. *PLOS Genet.*, 2(5):1–7.
- 1469 del Hoyo, J. and Collar, N. J. (2014). *HBW and BirdLife International Illustrated Check-*  
1470 *list of the Birds of the World. Volume 1. Non-passerines.* Lynx Edicions, Barcelona.
- 1471 Dickinson, E. C. and Remsen, J. V. (2013). *The Howard and Moore Complete Checklist of*  
1472 *the Birds of the World, Volume 1: Non-passerines (4th edition).* Aves Press, Eastbourne,  
1473 UK.
- 1474 dos Reis, M., Gunnell, G. F., Barba-Montoya, J., Wilkins, A., Yang, Z., and Yoder, A. D.  
1475 (2018). Using phylogenomic data to explore the effects of relaxed clocks and calibration  
1476 strategies on divergence time estimation: Primates as a test case. *Syst. Biol.*, 67(4):594–  
1477 615.
- 1478 dos Reis, M. and Yang, Z. (2011). Approximate likelihood calculation on a phylogeny for  
1479 Bayesian estimation of divergence times. *Mol. Biol. Evol.*, 28(7):2161–2172.
- 1480 dos Reis, M., Zhu, T., and Yang, Z. (2014). The impact of the rate prior on Bayesian esti-  
1481 mation of divergence times with multiple loci. *Syst. Biol.*, 63(4):555–565.
- 1482 Dos Remedios, N., Lee, P. L. M., Burke, T., Székely, T., and Küpper, C. (2015). North or  
1483 south? Phylogenetic and biogeographic origins of a globally distributed avian clade. *Mol.*  
1484 *Phylogenet. Evol.*, 89:151–159.
- 1485 Dove, C. J. (2000). A descriptive and phylogenetic analysis of plumulaceous feather char-  
1486 acters in Charadriiformes. *Ornithol. Monogr.*, 51:1–163.
- 1487 Drummond, A. J., Ho, S. Y. W., Phillips, M. J., and Rambaut, A. (2006). Relaxed phylo-  
1488 genetics and dating with confidence. *PLOS Biol.*, 4(5):e88.
- 1489 Dufour, P., Guerra Carande, J., Renaud, J., Renoult, J. P., Lavergne, S., and Crochet, P.-  
1490 A. (2020). Plumage colouration in gulls responds to their non-breeding climatic niche.  
1491 *Global Ecol. Biogeogr.*, 29(10):1704–1715.
- 1492 Edgar, R. C. (2004). MUSCLE: multiple sequence alignment with high accuracy and high  
1493 throughput. *Nucl. Acids Res.*, 32(5):1792–1797.

- 1494 Ericson, P. G. P., Anderson, C. L., Britton, T., Elzaiowski, A., Johansson, U. S.,  
1495 Källersjö, M., Ohlson, J. I., Parsons, T. J., Zuccon, D., and Mayr, G. (2006). Diver-  
1496 sification of Neoaves: integration of molecular sequence data and fossils. *Biol. Lett.*,  
1497 2(4):543–547.
- 1498 Ericson, P. G. P., Envall, I., Irestedt, M., and Norman, J. A. (2003). Inter-familial re-  
1499 lationships of the shorebirds (Aves: Charadriiformes) based on nuclear DNA sequence  
1500 data. *BMC Evol. Biol.*, 3(1):16.
- 1501 Fain, M. G. and Houde, P. (2004). Parallel radiations in the primary clades of birds. *Evo-*  
1502 *lution*, 58(11):2558–2573.
- 1503 Fain, M. G. and Houde, P. (2007). Multilocus perspectives on the monophyly and phy-  
1504 logeny of the order Charadriiformes (Aves). *BMC Evol. Biol.*, 7(1):35.
- 1505 Faircloth, B. C. (2015). PHYLUCE is a software package for the analysis of conserved  
1506 genomic loci. *Bioinform.*, 32(5):786–788.
- 1507 Faircloth, B. C., McCormack, J. E., Crawford, N. G., Harvey, M. G., Brumfield, R. T.,  
1508 and Glenn, T. C. (2012). Ultraconserved elements anchor thousands of genetic markers  
1509 spanning multiple evolutionary timescales. *Syst. Biol.*, 61(5):717–726.
- 1510 Field, D. J., Berv, J. S., Hsiang, A. Y., Lanfear, R., Landis, M. J., and Dornburg, A.  
1511 (2020). Timing the extant avian radiation: the rise of modern birds, and the importance  
1512 of modeling molecular rate variation. In Pittman, M. and Xu, X., editors, *Pennarap-*  
1513 *toran Theropod Dinosaurs: Past Progress and New Frontiers*, pages 159–182. Bull. Am.  
1514 Mus. Nat. Hist. 440.
- 1515 Freyman, W. A. (2015). SUMAC: constructing phylogenetic supermatrices and assessing  
1516 partially decisive taxon coverage. *Evol. Bioinform.*, 11:263–266.
- 1517 Friedman, M., Keck, B. P., Dornburg, A., Eytan, R. I., Martin, C. H., Hulsey, C. D.,  
1518 Wainwright, P. C., and Near, T. J. (2013). Molecular and fossil evidence place  
1519 the origin of cichlid fishes long after Gondwanan rifting. *Proc. R. Soc. Lond. B*,  
1520 280(1770):20131733.
- 1521 Garcia-R, J. C., Gibb, G. C., and Trewick, S. A. (2014). Deep global evolutionary radi-  
1522 ation in birds: Diversification and trait evolution in the cosmopolitan bird family Ralli-  
1523 dae. *Mol. Phylogenet. Evol.*, 81:96–108.
- 1524 Gatesy, J. and Springer, M. S. (2004). A critique of matrix representation with parsimony  
1525 supertrees. In Bininda-Emonds, O. R. P., editor, *Phylogenetic Supertrees: Combining In-*  
1526 *formation to Reveal the Tree of Life*, pages 369–388. Kluwer Academic Publishers, Dor-  
1527 drecht, NL.
- 1528 Gibson, R. and Baker, A. J. (2012). Multiple gene sequences resolve phylogenetic rela-  
1529 tionships in the shorebird suborder Scolopaci (Aves: Charadriiformes). *Mol. Phylogenet.*  
1530 *Evol.*, 64(1):66–72.

- 1531 Gysels, H. and Rabaey, M. (1964). Taxonomic relationships of *Alca torda*, *Fratercula arc-*  
1532 *tica* and *Uria aalge* as revealed by biochemical methods. *Ibis*, 106(4):536–540.
- 1533 Hackett, S. J., Kimball, R. T., Reddy, S., Bowie, R. C. K., Braun, E. L., Braun, M. J.,  
1534 Chojnowski, J. L., Cox, W. A., Han, K.-L., Harshman, J., Huddleston, C. J., Marks,  
1535 B. D., Miglia, K. J., Moore, W. S., Sheldon, F. H., Steadman, D. W., Witt, C. C., and  
1536 Yuri, T. (2008). A phylogenomic study of birds reveals their evolutionary history. *Sci-*  
1537 *ence*, 320(5884):1763–1768.
- 1538 Heath, T. A., Huelsenbeck, J. P., and Stadler, T. (2014). The fossilized birth–death pro-  
1539 cess for coherent calibration of divergence-time estimates. *Proc. Natl. Acad. Sci. USA*,  
1540 111(29):E2957–E2966.
- 1541 Hedman, M. M. (2010). Constraints on clade ages from fossil outgroups. *Paleobiol.*,  
1542 36(1):16–31.
- 1543 Heled, J. and Drummond, A. J. (2011). Calibrated tree priors for relaxed phylogenetics  
1544 and divergence time estimation. *Syst. Biol.*, 61(1):138–149.
- 1545 Höhna, S., Stadler, T., Ronquist, F., and Britton, T. (2011). Inferring speciation and ex-  
1546 tinction rates under different sampling schemes. *Mol. Biol. Evol.*, 28(9):2577–2589.
- 1547 Hood, S. C., Torres, C. R., Norell, M. A., and Clarke, J. A. (2019). New fossil birds from  
1548 the earliest Eocene of Mongolia. *Am. Mus. Nov.*, 2019(3934):1–24.
- 1549 Hope, S. (2002). The Mesozoic radiation of Neornithes. In Chiappe, L. M. and Witmer,  
1550 L. M., editors, *Mesozoic Birds: Above the Heads of Dinosaurs*, pages 339–388. University  
1551 of California Press, Berkeley, CA.
- 1552 Houde, P., Braun, E. L., Narula, N., Minjares, U., and Mirarab, S. (2019). Phylogenetic  
1553 signal of indels and the neoavian radiation. *Diversity*, 11(7):108.
- 1554 Hu, C., Zhang, C., Sun, L., Zhang, Y., Xie, W., Zhang, B., and Chang, Q. (2017). The  
1555 mitochondrial genome of pin-tailed snipe *Gallinago stenura*, and its implications for the  
1556 phylogeny of Charadriiformes. *PLoS ONE*, 12(4):e0175244.
- 1557 Inoue, J., Donoghue, P. C. J., and Yang, Z. (2009). The impact of the representation  
1558 of fossil calibrations on Bayesian estimation of species divergence times. *Syst. Biol.*,  
1559 59(1):74–89.
- 1560 Jarvis, E. D., Mirarab, S., Aberer, A. J., Li, B., Houde, P., Li, C., Ho, S. Y. W., Faircloth,  
1561 B. C., Nabholz, B., Howard, J. T., Suh, A., Weber, C. C., da Fonseca, R. R., Li, J.,  
1562 Zhang, F., Li, H., Zhou, L., Narula, N., Liu, L., Ganapathy, G., Boussau, B., Bayzid,  
1563 M. S., Zavidovych, V., Subramanian, S., Gabaldón, T., Capella-Gutiérrez, S., Huerta-  
1564 Cepas, J., Rekepalli, B., Munch, K., Schierup, M., Lindow, B., Warren, W. C., Ray, D.,  
1565 Green, R. E., Bruford, M. W., Zhan, X., Dixon, A., Li, S., Li, N., Huang, Y., Derry-  
1566 berry, E. P., Bertelsen, M. F., Sheldon, F. H., Brumfield, R. T., Mello, C. V., Lovell,  
1567 P. V., Wirthlin, M., Schneider, M. P. C., Prosdocimi, F., Samaniego, J. A., Velazquez,

- 1568 A. M. V., Alfaro-Núñez, A., Campos, P. F., Petersen, B., Sicheritz-Ponten, T., Pas, A.,  
1569 Bailey, T., Scofield, P., Bunce, M., Lambert, D. M., Zhou, Q., Perelman, P., Driskell,  
1570 A. C., Shapiro, B., Xiong, Z., Zeng, Y., Liu, S., Li, Z., Liu, B., Wu, K., Xiao, J., Yinqi,  
1571 X., Zheng, Q., Zhang, Y., Yang, H., Wang, J., Smeds, L., Rheindt, F. E., Braun, M.,  
1572 Fjeldså, J., Orlando, L., Barker, F. K., Jönsson, K. A., Johnson, W., Koepfli, K.-P.,  
1573 O'Brien, S., Haussler, D., Ryder, O. A., Rahbek, C., Willerslev, E., Graves, G. R.,  
1574 Glenn, T. C., McCormack, J., Burt, D., Ellegren, H., Alström, P., Edwards, S. V., Sta-  
1575 matakis, A., Mindell, D. P., Cracraft, J., Braun, E. L., Warnow, T., Jun, W., Gilbert,  
1576 M. T. P., and Zhang, G. (2014). Whole-genome analyses resolve early branches in the  
1577 tree of life of modern birds. *Science*, 346(6215):1320–1331.
- 1578 Jehl, J. R. (1968). The systematic position of the Surfbird, *Aphriza virgata*. *Condor*,  
1579 70(3):206–210.
- 1580 Jetz, W., Thomas, G. H., Joy, J. B., Hartmann, K., and Mooers, A. Ø. (2012). The global  
1581 diversity of birds in space and time. *Nature*, 491(7424):444–448.
- 1582 Jombart, T., Balloux, F., and Dray, S. (2010). adephylo: new tools for investigating the  
1583 phylogenetic signal in biological traits. *Bioinform.*, 26(15):1907–1909.
- 1584 Joseph, L., Lessa, E. P., and Christidis, L. (1999). Phylogeny and biogeography in the  
1585 evolution of migration: shorebirds of the *Charadrius* complex. *J. Biogeogr.*, 26(2):329–  
1586 342.
- 1587 Kass, R. E. and Raftery, A. E. (1995). Bayes factors. *J. Am. Stat. Assoc.*, 90(430):773–  
1588 795.
- 1589 Kearse, M., Moir, R., Wilson, A., Stones-Havas, S., Cheung, M., Sturrock, S., Buxton, S.,  
1590 Cooper, A., Markowitz, S., Duran, C., Thierer, T., Ashton, B., Meintjes, P., and Drum-  
1591 mond, A. (2012). Geneious Basic: An integrated and extendable desktop software plat-  
1592 form for the organization and analysis of sequence data. *Bioinform.*, 28(12):1647–1649.
- 1593 Kimball, R. T., Oliveros, C. H., Wang, N., White, N. D., Barker, F. K., Field, D. J.,  
1594 Ksepka, D. T., Chesser, R. T., Moyle, R. G., Braun, M. J., Brumfield, R. T., Faircloth,  
1595 B. C., Smith, B. T., and Braun, E. L. (2019). A phylogenomic supertree of birds. *Diver-*  
1596 *sity*, 11(7):109.
- 1597 Kimball, R. T., Wang, N., Heimer-McGinn, V., Ferguson, C., and Braun, E. L. (2013).  
1598 Identifying localized biases in large datasets: A case study using the avian tree of life.  
1599 *Mol. Phylogenet. Evol.*, 69(3):1021–1032.
- 1600 Kishino, H. and Hasegawa, M. (1989). Evaluation of the maximum likelihood estimate of  
1601 the evolutionary tree topologies from DNA sequence data, and the branching order in  
1602 Hominoidea. *J. Mol. Evol.*, 29(2):170–179.
- 1603 Kobert, K., Salichos, L., Rokas, A., and Stamatakis, A. (2016). Computing the internode  
1604 certainty and related measures from partial gene trees. *Mol. Biol. Evol.*, 33(6):1606–  
1605 1617.



- 1606 Kozlov, A. M., Darriba, D., Flouri, T., Morel, B., and Stamatakis, A. (2019). RAxML-NG:  
1607 a fast, scalable and user-friendly tool for maximum likelihood phylogenetic inference.  
1608 *Bioinform.*, 35(21):4453–4455.
- 1609 Kozlova, E. V. (1961). *Fauna of USSR: Birds. Volume II No. 3. Charadriiformes, Suborder*  
1610 *Alcae [Translation by R. Ettinger]*. Israel Program for Scientific Translations, Jerusalem.
- 1611 Krajewski, C., Sipiorski, J. T., and Anderson, F. E. (2010). Complete mitochondrial  
1612 genome sequences and the phylogeny of cranes (Gruiformes: Gruidae). *Auk*, 127(2):440–  
1613 452.
- 1614 Ksepka, D. T., Parham, J. F., Allman, J. F., Benton, M. J., Carrano, M. T., Cranston,  
1615 K. A., Donoghue, P. C. J., Head, J. J., Hermesen, E. J., Irmis, R. B., Joyce, W. G.,  
1616 Kohli, M., Lamm, K. D., Leehr, D., Patané, J. S. L., Polly, P. D., Phillips, M. J., Smith,  
1617 N. A., Smith, N. D., van Tuinen, M., Ware, J. L., and Warnock, R. C. M. (2015). The  
1618 fossil calibration database—a new resource for divergence dating. *Syst. Biol.*, 64(5):853–  
1619 859.
- 1620 Ksepka, D. T. and Phillips, M. J. (2015). Avian diversification patterns across the K-Pg  
1621 boundary: influence of calibrations, datasets, and model misspecification. *Ann. Missouri*  
1622 *Bot. Gard.*, 100(4):300–328.
- 1623 Ksepka, D. T., Stidham, T. A., and Williamson, T. E. (2017). Early Paleocene landbird  
1624 supports rapid phylogenetic and morphological diversification of crown birds after the  
1625 K–Pg mass extinction. *Proc. Natl. Acad. Sci. USA*, 114(30):8047–8052.
- 1626 Kuhl, H., Frankl-Vilches, C., Bakker, A., Mayr, G., Nikolaus, G., Boerno, S. T., Klages,  
1627 S., Timmermann, B., and Gahr, M. (2020). An unbiased molecular approach using 3′-  
1628 UTRs resolves the avian family-level tree of life. *Mol. Biol. Evol.*, 38(1):108–127.
- 1629 Lanfear, R., Frandsen, P. B., Wright, A. M., Senfeld, T., and Calcott, B. (2016). Partition-  
1630 Finder 2: new methods for selecting partitioned models of evolution for molecular and  
1631 morphological phylogenetic analyses. *Mol. Biol. Evol.*, 34(3):772–773.
- 1632 Lanyon, S. M. (1988). The stochastic mode of molecular evolution: What consequences for  
1633 systematic investigations? *Auk*, 105(3):565–573.
- 1634 Larsson, A. (2014). AliView: a fast and lightweight alignment viewer and editor for large  
1635 datasets. *Bioinform.*, 30(22):3276–3278.
- 1636 Lewis, P. O. (2001). A likelihood approach to estimating phylogeny from discrete morpho-  
1637 logical character data. *Syst. Biol.*, 50(6):913–925.
- 1638 Livezey, B. C. (2010). Phylogenetics of modern shorebirds (Charadriiformes) based on  
1639 phenotypic evidence: analysis and discussion. *Zool. J. Linn. Soc.*, 160(3):567–618.
- 1640 Livezey, B. C. and Zusi, R. L. (2007). Higher-order phylogeny of modern birds  
1641 (Theropoda, Aves: Neornithes) based on comparative anatomy. II. Analysis and discus-  
1642 sion. *Zool. J. Linn. Soc.*, 149(1):1–95.

- 1643 Makowski, D., Ben-Shachar, M. S., and Lüdecke, D. (2019). bayestestR: Describing ef-  
1644 fects and their uncertainty, existence and significance within the Bayesian framework. *J.*  
1645 *Open Source Softw.*, 4(40):1541.
- 1646 Marjanović, D. (2021). The making of calibration sausage exemplified by recalibrating the  
1647 transcriptomic timetree of jawed vertebrates. *Front. Genet.*, 12:535.
- 1648 Marki, P. Z., Jönsson, K. A., Irestedt, M., Nguyen, J. M. T., Rahbek, C., and Fjeldså, J.  
1649 (2017). Supermatrix phylogeny and biogeography of the Australasian Meliphagides radi-  
1650 ation (Aves: Passeriformes). *Mol. Phylogenet. Evol.*, 107:516–529.
- 1651 Marshall, C. R. (2017). Five palaeobiological laws needed to understand the evolution of  
1652 the living biota. *Nature Ecol. Evol.*, 1(6):0165.
- 1653 Mayr, G. (2000). Charadriiform birds from the early Oligocene of Céreste (France) and  
1654 the Middle Eocene of Messel (Hessen, Germany). *Geobios*, 33(5):625–636.
- 1655 Mayr, G. (2009). *Paleogene Fossil Birds*. Springer-Verlag, Berlin, Germany.
- 1656 Mayr, G. (2011). The phylogeny of charadriiform birds (shorebirds and allies) – reassessing  
1657 the conflict between morphology and molecules. *Zool. J. Linn. Soc.*, 161(4):916–934.
- 1658 Mayr, G. (2014). The origins of crown group birds: molecules and fossils. *Palaeontol.*,  
1659 57(2):231–242.
- 1660 Mayr, G. (2016). The world’s smallest owl, the earliest unambiguous charadriiform bird,  
1661 and other avian remains from the early Eocene Nanjemoy Formation of Virginia (USA).  
1662 *PalZ*, 90(4):747–763.
- 1663 McCormack, J. E., Harvey, M. G., Faircloth, B. C., Crawford, N. G., Glenn, T. C., and  
1664 Brumfield, R. T. (2013). A phylogeny of birds based on over 1,500 loci collected by tar-  
1665 get enrichment and high-throughput sequencing. *PLoS ONE*, 8(1):1–11.
- 1666 McCraney, W. T., Thacker, C. E. T., and Alfaro, M. E. (2020). Supermatrix phylogeny  
1667 resolves goby lineages and reveals unstable root of Gobiaria. *Mol. Phylogenet. Evol.*,  
1668 151:106862.
- 1669 McGowen, M. R., Tsagkogeorga, G., Álvarez Carretero, S., dos Reis, M., Struebig, M.,  
1670 Deaville, R., Jepson, P. D., Jarman, S., Polanowski, A., Morin, P. A., and Rossiter, S. J.  
1671 (2019). Phylogenomic resolution of the cetacean tree of life using target sequence cap-  
1672 ture. *Syst. Biol.*, 69(3):479–501.
- 1673 McKittrick, M. C. (1991). Phylogenetic analysis of avian hindlimb musculature. *Misc. Pub.*  
1674 *Mus. Zool. U. Michigan*, 179:1–87.
- 1675 Miller, M. A., Pfeiffer, W., and Schwartz, T. (2010). Creating the CIPRES Science Gate-  
1676 way for inference of large phylogenetic trees. In *Proceedings of the Gateway Comput-*  
1677 *ing Environments Workshop (GCE), 14 Nov. 2010, New Orleans, LA*, pages 1–8. IEEE  
1678 Press.

- 1679 Mirarab, S., Bayzid, M. S., and Warnow, T. (2014a). Evaluating summary methods for  
1680 multilocus species tree estimation in the presence of incomplete lineage sorting. *Syst.*  
1681 *Biol.*, 65(3):366–380.
- 1682 Mirarab, S., Reaz, R., Bayzid, M. S., Zimmermann, T., Swenson, M. S., and Warnow, T.  
1683 (2014b). ASTRAL: genome-scale coalescent-based species tree estimation. *Bioinform.*,  
1684 30(17):i541–i548.
- 1685 Mitchell, J. S., Etienne, R. S., and Rabosky, D. L. (2018). Inferring diversification rate  
1686 variation from phylogenies with fossils. *Syst. Biol.*, 68(1):1–18.
- 1687 Moynihan, M. (1959). A revision of the family Laridae (Aves). *Am. Mus. Nov.*, 1928:1–42.
- 1688 Musser, G. and Clarke, J. A. (2020). An exceptionally preserved specimen from the Green  
1689 River Formation elucidates complex phenotypic evolution in Gruiformes and Charadri-  
1690 iformes. *Front. Ecol. Evol.*, 8:559929.
- 1691 Musser, G., Ksepka, D. T., and Field, D. J. (2019). New material of Paleocene-Eocene  
1692 *Pellornis* (Aves: Gruiformes) clarifies the pattern and timing of the extant gruiform ra-  
1693 diation. *Diversity*, 11(7):102.
- 1694 Nguyen, L.-T., Schmidt, H. A., von Haeseler, A., and Minh, B. Q. (2014). IQ-TREE: A  
1695 fast and effective stochastic algorithm for estimating maximum-likelihood phylogenies.  
1696 *Mol. Biol. Evol.*, 32(1):268–274.
- 1697 Nielsen, B. P. (1975). Affinities of *Eudromias morinellus* (L.) to the genus *Charadrius* L.  
1698 *Ornis Scand.*, 6(1):65–82.
- 1699 Olson, S. L. and Steadman, D. W. (1981). The relationships of the Pedionomidae (Aves,  
1700 Charadriiformes). *Smithson. Contrib. Zool.*, 337:1–25.
- 1701 Olsson, U. and Alström, P. (2020). A comprehensive phylogeny and taxonomic evaluation  
1702 of the waxbills (Aves: Estrildidae). *Mol. Phylogenet. Evol.*, 146:106757.
- 1703 Parham, J. F., Donoghue, P. C. J., Bell, C. J., Calway, T. D., Head, J. J., Holroyd, P. A.,  
1704 Inoue, J. G., Irmis, R. B., Joyce, W. G., Ksepka, D. T., Patané, J. S. L., Smith, N. D.,  
1705 Tarver, J. E., van Tuinen, M., Yang, Z., Angielczyk, K. D., Greenwood, J. M., Hipsley,  
1706 C. A., Jacobs, L., Makovicky, P. J., Müller, J., Smith, K. T., Theodor, J. M., Warnock,  
1707 R. C. M., and Benton, M. J. (2011). Best practices for justifying fossil calibrations. *Syst.*  
1708 *Biol.*, 61(2):346–359.
- 1709 Paton, T., Haddrath, O., and Baker, A. J. (2002). Complete mitochondrial DNA genome  
1710 sequences show that modern birds are not descended from transitional shorebirds. *Proc.*  
1711 *R. Soc. Lond. B*, 269(1493):839–846.
- 1712 Paton, T. A. and Baker, A. J. (2006). Sequences from 14 mitochondrial genes provide a  
1713 well-supported phylogeny of the Charadriiform birds congruent with the nuclear RAG-1  
1714 tree. *Mol. Phylogenet. Evol.*, 39(3):657–667.

- 1715 Paton, T. A., Baker, A. J., Groth, J. G., and Barrowclough, G. F. (2003). RAG-1 se-  
1716 quences resolve phylogenetic relationships within Charadriiform birds. *Mol. Phylogenet.*  
1717 *Evol.*, 29(2):268–278.
- 1718 Pereira, S. L. and Baker, A. J. (2006). A mitogenomic timescale for birds detects variable  
1719 phylogenetic rates of molecular evolution and refutes the standard molecular clock. *Mol.*  
1720 *Biol. Evol.*, 23(9):1731–1740.
- 1721 Pereira, S. L. and Baker, A. J. (2008). DNA evidence for a Paleocene origin of the Alcidae  
1722 (Aves: Charadriiformes) in the Pacific and multiple dispersals across northern oceans.  
1723 *Mol. Phylogenet. Evol.*, 46(2):430–445.
- 1724 Pereira, S. L. and Baker, A. J. (2010). The enigmatic monotypic crab plover *Dromas arde-*  
1725 *ola* is closely related to pratincoles and coursers (Aves, Charadriiformes, Glareolidae).  
1726 *Genet. Mol. Biol.*, 33(3):583–586.
- 1727 Plummer, M., Best, N., Cowles, K., and Vines, K. (2006). CODA: Convergence Diagnosis  
1728 and Output Analysis for MCMC. *R News*, 6:7–11.
- 1729 Pons, J.-M., Hassanin, A., and Crochet, P.-A. (2005). Phylogenetic relationships within  
1730 the Laridae (Charadriiformes: Aves) inferred from mitochondrial markers. *Mol. Phylo-*  
1731 *genet. Evol.*, 37(3):686–699.
- 1732 Prum, R. O., Berv, J. S., Dornburg, A., Field, D. J., Townsend, J. P., Lemmon, E. M.,  
1733 and Lemmon, A. R. (2015). A comprehensive phylogeny of birds (Aves) using targeted  
1734 next-generation DNA sequencing. *Nature*, 526(7574):569–573.
- 1735 R Core Team (2019). *R: A Language and Environment for Statistical Computing*. R Foun-  
1736 dation for Statistical Computing, Vienna, Austria.
- 1737 Rabiee, M. and Mirarab, S. (2020). Forcing external constraints on tree inference using  
1738 ASTRAL. *BMC Genom.*, 21(2):218.
- 1739 Rabosky, D. L. (2014). Automatic detection of key innovations, rate shifts, and diversity-  
1740 dependence on phylogenetic trees. *PLOS ONE*, 9(2):e89543.
- 1741 Rabosky, D. L. (2015). No substitute for real data: A cautionary note on the use of phylo-  
1742 genies from birth–death polytomy resolvers for downstream comparative analyses. *Evo-*  
1743 *lution*, 69(12):3207–3216.
- 1744 Rabosky, D. L., Grudler, M., Anderson, C., Title, P., Shi, J. J., Brown, J. W., Huang, H.,  
1745 and Larson, J. G. (2014). BAMMtools: an R package for the analysis of evolutionary  
1746 dynamics on phylogenetic trees. *Methods Ecol. Evol.*, 5(7):701–707.
- 1747 Rambaut, A. and Drummond, A. J. (2018). LogCombiner v1.10.4. Available from [http:](http://beast.community/logcombiner.html)  
1748 [//beast.community/logcombiner.html](http://beast.community/logcombiner.html).
- 1749 Rambaut, A., Drummond, A. J., Xie, D., Baele, G., and Suchard, M. A. (2018). Posterior  
1750 summarization in Bayesian phylogenetics using Tracer 1.7. *Syst. Biol.*, 67(5):901–904.

- 1751 Rannala, B. (2016). Conceptual issues in Bayesian divergence time estimation. *Phil.*  
1752 *Trans. R. Soc. B*, 371(1699):20150134.
- 1753 Rannala, B. and Yang, Z. (2007). Inferring speciation times under an episodic molecular  
1754 clock. *Syst. Biol.*, 56(3):453–466.
- 1755 Reddy, S., Kimball, R. T., Pandey, A., Hosner, P. A., Braun, M. J., Hackett, S. J., Han,  
1756 K.-L., Harshman, J., Huddleston, C. J., Kingston, S., Marks, B. D., Miglia, K. J.,  
1757 Moore, W. S., Sheldon, F. H., Witt, C. C., Yuri, T., and Braun, E. L. (2017). Why do  
1758 phylogenomic data sets yield conflicting trees? Data type influences the avian tree of life  
1759 more than taxon sampling. *Syst. Biol.*, 66(5):857–879.
- 1760 Revell, L. J. (2012). phytools: an R package for phylogenetic comparative biology (and  
1761 other things). *Methods Ecol. Evol.*, 3(2):217–223.
- 1762 Reyes, A., Gissi, C., Catzeflis, F., Nevo, E., Pesole, G., and Saccone, C. (2004). Congruent  
1763 mammalian trees from mitochondrial and nuclear genes using Bayesian methods. *Mol.*  
1764 *Biol. Evol.*, 21(2):397–403.
- 1765 Richards, E. J., Brown, J. M., Barley, A. J., Chong, R. A., and Thomson, R. C. (2018).  
1766 Variation across mitochondrial gene trees provides evidence for systematic error: How  
1767 much gene tree variation is biological? *Syst. Biol.*, 67(5):847–860.
- 1768 Robinson, D. F. and Foulds, L. R. (1981). Comparison of phylogenetic trees. *Math.*  
1769 *Biosci.*, 53(1):131–147.
- 1770 Ronquist, F., Klopfstein, S., Vilhelmsen, L., Schulmeister, S., Murray, D. L., and Rasnit-  
1771 syn, A. P. (2012a). A total-evidence approach to dating with fossils, applied to the early  
1772 radiation of the Hymenoptera. *Syst. Biol.*, 61(6):973–999.
- 1773 Ronquist, F., Teslenko, M., van der Mark, P., Ayres, D. L., Darling, A., Höhna, S., Larget,  
1774 B., Liu, L., Suchard, M. A., and Huelsenbeck, J. P. (2012b). MrBayes 3.2: Efficient  
1775 Bayesian phylogenetic inference and model choice across a large model space. *Syst.*  
1776 *Biol.*, 61(3):539–542.
- 1777 Rotthowe, K. and Starck, J. M. (1998). Evidence for a phylogenetic position of button  
1778 quails (Turnicidae: Aves) among the Gruiformes. *J. Zool. Syst. Evol. Res.*, 36(1).
- 1779 Salichos, L. and Rokas, A. (2013). Inferring ancient divergences requires genes with strong  
1780 phylogenetic signals. *Nature*, 497(7449):327–331.
- 1781 Salichos, L., Stamatakis, A., and Rokas, A. (2014). Novel information theory-based  
1782 measures for quantifying incongruence among phylogenetic trees. *Mol. Biol. Evol.*,  
1783 31(5):1261–1271.
- 1784 Sanderson, M. J., McMahon, M. M., and Steel, M. (2010). Phylogenomics with incomplete  
1785 taxon coverage: the limits to inference. *BMC Evol. Biol.*, 10(1):155.



- 1786 Sarver, B. A., Pennell, M. W., Brown, J. W., Keeble, S., Hardwick, K. M., Sullivan, J.,  
1787 and Harmon, L. J. (2019). The choice of tree prior and molecular clock does not sub-  
1788 stantially affect phylogenetic inferences of diversification rates. *PeerJ*, 7:e6334.
- 1789 Sayyari, E. and Mirarab, S. (2016). Fast coalescent-based computation of local branch  
1790 support from quartet frequencies. *Mol. Biol. Evol.*, 33(7):1654–1668.
- 1791 Sayyari, E. and Mirarab, S. (2018). Testing for polytomies in phylogenetic species trees  
1792 using quartet frequencies. *Genes*, 9(3):132.
- 1793 Sayyari, E., Whitfield, J. B., and Mirarab, S. (2018). DiscoVista: Interpretable visualiza-  
1794 tions of gene tree discordance. *Mol. Phylogenet. Evol.*, 122:110–115.
- 1795 Schliep, K. P. (2010). phangorn: phylogenetic analysis in R. *Bioinform.*, 27(4):592–593.
- 1796 Shimodaira, H. (2002). An approximately unbiased test of phylogenetic tree selection.  
1797 *Syst. Biol.*, 51(3):492–508.
- 1798 Shimodaira, H. and Hasegawa, M. (1999). Multiple comparisons of log-likelihoods with  
1799 applications to phylogenetic inference. *Mol. Biol. Evol.*, 16(8):1114–1114.
- 1800 Sibley, C. G. and Ahlquist, J. E. (1990). *Phylogeny and Classification of Birds: A Study in*  
1801 *Molecular Evolution*. Yale University Press, New Haven, CT.
- 1802 Smith, B. T. and Klicka, J. (2013). Examining the role of effective population size on  
1803 mitochondrial and multilocus divergence time discordance in a songbird. *PLOS ONE*,  
1804 8(2):e55161.
- 1805 Smith, N. A. (2011). *Systematics and evolution of extinct and extant Pan-Alcidae (Aves,*  
1806 *Charadriiformes): combined phylogenetic analyses, divergence estimation, and paleocli-*  
1807 *matic interactions*. PhD thesis, University of Texas at Austin.
- 1808 Smith, N. A. (2015). Sixteen vetted fossil calibrations for divergence dating of Charadri-  
1809 iformes (Aves, Neognathae). *Palaeont. Elec.*, 18.1.4FC.
- 1810 Smith, N. A. and Clarke, J. A. (2012). Endocranial anatomy of the Charadriiformes:  
1811 sensory system variation and the evolution of wing-propelled diving. *PLoS ONE*,  
1812 7(11):e49584.
- 1813 Smith, N. A. and Clarke, J. A. (2015). Systematics and evolution of the Pan-Alcidae  
1814 (Aves, Charadriiformes). *J. Avian Biol.*, 46(2):125–140.
- 1815 Smith, S. A., Brown, J. W., and Walker, J. F. (2018). So many genes, so little time: A  
1816 practical approach to divergence-time estimation in the genomic era. *PLOS ONE*,  
1817 13(5):e0197433.
- 1818 Springer, M. S., Emerling, C. A., Meredith, R. W., Janečka, J. E., Eizirik, E., and Mur-  
1819 phy, W. J. (2017). Waking the undead: Implications of a soft explosive model for the  
1820 timing of placental mammal diversification. *Mol. Phylogenet. Evol.*, 106:86–102.

- 1821 Stamatakis, A. (2014). RAxML version 8: a tool for phylogenetic analysis and post-  
1822 analysis of large phylogenies. *Bioinform.*, 30(9):1312–1313.
- 1823 Storer, R. W. (1960). Evolution in the diving birds. In Bergman, G., Donner, K. O., and  
1824 von Haartman, L., editors, *Proceedings of the XII International Ornithological Congress*,  
1825 pages 694–707. Tilgmannin Kirjapaino, Helsinki.
- 1826 Strauch, J. G. (1978). The phylogeny of the Charadriiformes (Aves): a new estimate using  
1827 the method of character compatibility analysis. *Trans. Zool. Soc. Lond.*, 34(3):263–345.
- 1828 Strimmer, K. and Rambaut, A. (2002). Inferring confidence sets of possibly misspecified  
1829 gene trees. *Proc. R. Soc. Lond. B*, 269(1487):137–142.
- 1830 Su, D., Yang, L., Shi, X., Ma, X., Zhou, X., Hedges, S. B., and Zhong, B. (2021). Large-  
1831 scale phylogenomic analyses reveal the monophyly of bryophytes and Neoproterozoic  
1832 origin of land plants. *Mol. Biol. Evol.*
- 1833 Suh, A. (2016). The phylogenomic forest of bird trees contains a hard polytomy at the  
1834 root of Neoaves. *Zool. Scr.*, 45(S1):50–62.
- 1835 Suh, A., Smeds, L., and Ellegren, H. (2015). The dynamics of incomplete lineage sorting  
1836 across the ancient adaptive radiation of neoavian birds. *PLOS Biol.*, 13(8):1–18.
- 1837 Thomas, G. H., Wills, M. A., and Székely, T. (2004). A supertree approach to shorebird  
1838 phylogeny. *BMC Evol. Biol.*, 4(1):28.
- 1839 Upham, N. S., Esselstyn, J. A., and Jetz, W. (2020). Ecological causes of uneven specia-  
1840 tion and species richness in mammals. *bioRxiv*, page doi:10.1101/504803.
- 1841 Verheyen, R. (1958). Analyse du potentiel morphologique et projet d’une nouvelle classifi-  
1842 cation des charadriiformes. *Bull. Inst. roy. Sci. nat. Belg.*, 34(18):1–35.
- 1843 Warnock, R. C. M., Yang, Z., and Donoghue, P. C. J. (2012). Exploring uncertainty in the  
1844 calibration of the molecular clock. *Biol. Lett.*, 8(1):156–159.
- 1845 Weedop, K. B., Mooers, A. Ø., Tucker, C. M., and Pearse, W. D. (2019). The effect of  
1846 phylogenetic uncertainty and imputation on EDGE Scores. *Anim. Conserv.*, 22(6):527–  
1847 536.
- 1848 Wetmore, A. (1960). A classification for the birds of the world. *Smithson. Misc. Coll.*,  
1849 139(11):1–37.
- 1850 Whitfield, J. B. and Lockhart, P. J. (2007). Deciphering ancient rapid radiations. *Trends*  
1851 *Ecol. Evol.*, 22(5):258–265.
- 1852 Wilkinson, R. D., Steiper, M. E., Soligo, C., Martin, R. D., Yang, Z., and Tavaré, S.  
1853 (2010). Dating primate divergences through an integrated analysis of palaeontological  
1854 and molecular data. *Syst. Biol.*, 60(1):16–31.

- 1855 Xie, W., Lewis, P. O., Fan, Y., Kuo, L., and Chen, M.-H. (2011). Improving marginal like-  
1856 lihood estimation for Bayesian phylogenetic model selection. *Syst. Biol.*, 60(2):150–160.
- 1857 Yang, Z. (2007). PAML 4: Phylogenetic Analysis by Maximum Likelihood. *Mol. Biol.*  
1858 *Evol.*, 24(8):1586–1591.
- 1859 Yang, Z. (2014). *Molecular Evolution: A Statistical Approach*. Oxford University Press,  
1860 Oxford, UK.
- 1861 Yang, Z. and Rannala, B. (2005). Bayesian estimation of species divergence times under  
1862 a molecular clock using multiple fossil calibrations with soft bounds. *Mol. Biol. Evol.*,  
1863 23(1):212–226.
- 1864 Yuri, T., Kimball, R. T., Harshman, J., Bowie, R. C. K., Braun, M. J., Chojnowski, J. L.,  
1865 Han, K.-L., Hackett, S. J., Huddleston, C. J., Moore, W. S., Reddy, S., Sheldon, F. H.,  
1866 Steadman, D. W., Witt, C. C., and Braun, E. L. (2013). Parsimony and model-based  
1867 analyses of indels in avian nuclear genes reveal congruent and incongruent phylogenetic  
1868 signals. *Biology*, 2(1):419–444.
- 1869 Zhang, C., Rabiee, M., Sayyari, E., and Mirarab, S. (2018). ASTRAL-III: polynomial time  
1870 species tree reconstruction from partially resolved gene trees. *BMC Bioinform.*, 19:153.
- 1871 Zhang, G., Li, B., Li, C., Gilbert, M. T. P., Jarvis, E. D., Wang, J., and Consortium, T.  
1872 A. G. (2014). Comparative genomic data of the Avian Phylogenomics Project. *Giga-*  
1873 *Science*, 3(1).
- 1874 Zheng, Y., Peng, R., Kuro-o, M., and Zeng, X. (2011). Exploring patterns and extent of  
1875 bias in estimating divergence time from mitochondrial DNA sequence data in a particu-  
1876 lar lineage: a case study of salamanders (order Caudata). *Mol. Biol. Evol.*, 28(9):2521–  
1877 2535.

## 1878 Figure Captions

1879 **Figure 1.** Previous age estimates for the Charadriiformes, plotted against the publica-  
1880 tion year and the oldest crown-charadriiform fossil known at the time (solid line). Mean  
1881 estimates across different studies are shown separately for the total group (dotted line)  
1882 and crown group (dashed line). After a long period during which the molecular divergence  
1883 times drastically predated the known fossil record, the converse problem has started to oc-  
1884 cur with the advent of phylogenomic studies in the mid 2010s. See References for the full  
1885 citations of the studies shown.

1886

1887 **Figure 2.** Taxonomic coverage of previous phylogenetic analyses of the Charadriiformes.  
1888 Outgroups were not included in counts of family-level coverage. Counts of total recognized  
1889 charadriiform families follow Boyd (2019). Bars are labeled with the number of characters  
1890 used; asterisks denote morphological characters.

1891

1892 **Figure 3.** Gene tree support for higher-level clades of shorebirds summarized using Dis-  
1893 coVista. Strong support or rejection are defined by the focal or conflicting clade exceeding  
1894 a 75% bootstrap threshold, respectively; missing data refers to loci that lacked the taxon  
1895 sampling needed to evaluate a given branch. For *Pluvianus* and *Dromas*, two family-level  
1896 taxa whose phylogenetic positions differed between the species-tree and concatenated anal-  
1897 yses, all three possible resolutions of the relevant branch have been scored.

1898

1899 **Figure 4.** Phylogenetic estimates for the Charadriiformes obtained from species-tree (a),  
1900 concatenated maximum likelihood (b), and concatenated Bayesian (c) methods. Higher-  
1901 level clades have been collapsed except when subject to topological conflict; branches sub-  
1902 tending terminal taxa are shown in gray. The node labels of the RAxML tree denote in-  
1903 ternode certainty (IC) values; the light blue and red lines connect taxa with conflicting  
1904 placements between a given pair of trees. Note that the effective number of genes for the  
1905 ASTRAL tree is calculated out of a maximum of 10 (mitochondrial genome treated as a  
1906 single unit), while the per-branch locus coverage of the concatenation-based trees is calcu-  
1907 lated out of 24 (mitochondrial loci analyzed separately). The full versions of all three trees  
1908 are given in Supplementary Information (Figs. S3–S8).

1909

1910 **Figure 5.** Time-calibrated phylogeny of 336 species of shorebirds based on the Bayesian  
1911 node-dating analysis of 8 clock-like loci under the independent-rates relaxed clock and a  
1912 fixed maximum-likelihood topology inferred using RAxML-NG from 24 genes and 69 mor-  
1913 phological characters. The figure and this caption continue on the opposite page. Nodes  
1914 with bootstrap support  $\geq 70\%$  are indicated by circles; nodes with bootstrap support  
1915  $< 70\%$  are indicated by squares. Fossil-calibrated nodes are shown in black; the second of  
1916 the two numbers corresponds to that in Table 2. Shaded tabs represent higher-level clades;  
1917 background shading indicates geochronological epochs. Ma = million years ago; Ster. =  
1918 Stercorariidae; Tur. = Turnicidae; Jac. = Jacanidae; Hae. = Haematopodidae; Rec. = Re-  
1919 curvirostridae; Bur. = Burhinidae; Chion. = Chionida; Palcn = Paleocene; E = Eocene; O  
1920 = Oligocene; Mc = Miocene; Plicn = Pliocene; Pls = Pleistocene. Representative species  
1921 are illustrated next to their lineages; see Supplementary Information (Table S2) for full

1922 image credits.

1923 **Figure 6.** Comparison of the prior and posterior node age distributions under the AR ver-  
1924 sus IR relaxed clock models. Node numbers on the left correspond to those in Figure 5.  
1925 Lines and boxes represent the 95% prior and posterior credibility intervals, respectively  
1926 (with prior means indicated by diamonds and posterior means indicated by vertical lines).  
1927 Calibrated nodes are highlighted by black circles; the calibration number inside each circle  
1928 corresponds to that in Table 2. Clade labels are provided for suprageneric taxa and major  
1929 genera; the labels for calibrated nodes are in black and denoted by asterisk, while other  
1930 nodes are labeled in gray. Insets show the kernel densities of node ages under the AR ver-  
1931 sus IR models; the density for the user-specified prior was calculated from 1000 simulated  
1932 trees.

1933  
1934 **Figure 7.** Probability density functions for the ages of the 16 calibrated nodes. “User  
1935 prior” = user-specified calibration densities (truncated Cauchy for calibrations 1 through  
1936 15, soft-bounded uniform for calibration 16); “Joint prior” = effective prior resulting from  
1937 calibration interactions under the IR model; “Posterior” = marginal posterior under the  
1938 IR model.

1939  
1940 **Figure 8.** Top: phylorate plots for the AR (a) and IR (b) trees with branches colored by  
1941 the net diversification rate (in  $\text{sp}\cdot\text{Myr}^{-1}$ ) and rate shifts denoted by red circles. Bottom:  
1942 corresponding rate-through-time (RTT) plots showing the mean speciation and extinction  
1943 rates with their associated 95% credibility intervals (c, d). The RTT plot for the IR tree  
1944 (d) shows the rates for both the background regime and the shifted regime corresponding  
1945 to the gull clade highlighted in (b).
